1 **The interferon stimulated gene-encoded protein HELZ2 inhibits human LINE-1**  
2 **retrotransposition and LINE-1 RNA-mediated type I interferon induction**

3  
4 Ahmad Luqman-Fatah<sup>1,3</sup>, Yuzo Watanabe<sup>2</sup>, Fuyuki Ishikawa<sup>1,3</sup>, John V. Moran<sup>4,5</sup>, and  
5 \*Tomoichiro Miyoshi<sup>1,3</sup>

6  
7 <sup>1</sup> Department of Gene Mechanisms, Graduate School of Biostudies, Kyoto University, Kyoto  
8 606-8501, Japan

9 <sup>2</sup> Proteomics Facility, Graduate School of Biostudies, Kyoto University, Kyoto 606-8501, Japan

10 <sup>3</sup> Radiation Biology Center, Graduate School of Biostudies, Kyoto University, Kyoto 606-8501,  
11 Japan

12 <sup>4</sup> Department of Human Genetics, University of Michigan Medical School, Ann Arbor, MI  
13 48109-5618, USA

14 <sup>5</sup> Department of Internal Medicine, University of Michigan Medical School, Ann Arbor, MI  
15 48109-5618, USA

16  
17 **\*Correspondence:** [miyoshi.tomoichiro.5e@kyoto-u.ac.jp](mailto:miyoshi.tomoichiro.5e@kyoto-u.ac.jp) (T.M.)

18 **Abstract**

19 Some interferon stimulated genes (ISGs) encode proteins that inhibit LINE-1 (L1)  
20 retrotransposition. Here, we used immunoprecipitation followed by liquid chromatography-  
21 tandem mass spectrometry to identify proteins that associate with the L1 ORF1-encoded  
22 protein (ORF1p) in ribonucleoprotein particles. Three ISG proteins that interact with ORF1p  
23 inhibit retrotransposition: HECT and RLD domain containing E3 ubiquitin-protein ligase 5  
24 (HERC5); 2'-5'-oligoadenylate synthetase-like (OASL); and helicase with zinc finger 2  
25 (HELZ2). HERC5 destabilizes ORF1p, but does not affect its cellular localization. OASL  
26 impairs ORF1p cytoplasmic foci formation. HELZ2 recognizes sequences and/or structures  
27 within the L1 5'UTR to reduce L1 RNA, ORF1p, and ORF1p cytoplasmic foci levels.  
28 Overexpression of WT or reverse transcriptase-deficient L1s led to a modest induction of IFN-  
29  $\alpha$  expression, which was abrogated upon HELZ2 overexpression. Notably, IFN- $\alpha$  expression  
30 was enhanced upon overexpression of an ORF1p RNA binding mutant, suggesting ORF1p  
31 binding might protect L1 RNA from "triggering" IFN- $\alpha$  induction. Thus, ISG proteins can inhibit  
32 retrotransposition by different mechanisms.

## 33 Introduction

34 Sequences derived from Long Interspersed Element-1 (LINE-1 or L1) retrotransposons  
35 comprise ~17% of human genomic DNA<sup>1</sup>. The overwhelming majority of L1-derived  
36 sequences have been rendered retrotransposition-defective by mutational processes either  
37 during or after their integration into the genome<sup>2-4</sup>. However, an average human genome is  
38 estimated to contain at least 100 full-length human-specific retrotransposition-competent L1s  
39 (RC-L1s)<sup>5-7</sup>, with only a small number of human-specific “hot” L1s responsible for the bulk of  
40 retrotransposition activity<sup>6,8</sup>.

41 Human RC-L1s are ~6 kb and consist of a 5' untranslated region (UTR), two open reading  
42 frames (ORF1 and ORF2), and a 3'UTR that ends in a poly(A) tract<sup>4,9,10</sup>. ORF1 encodes a ~40  
43 kDa protein (ORF1p) that has RNA-binding and nucleic acid chaperone activities<sup>11-13</sup>. ORF2  
44 encodes a ~150-kDa protein (ORF2p) that has endonuclease (EN) and reverse transcriptase  
45 (RT) activities required for canonical L1 retrotransposition<sup>14-17</sup>. RC-L1s mobilize via a “copy-  
46 and-paste” mechanism, where an L1 RNA intermediate is reverse transcribed into an L1 cDNA  
47 at a new genomic integration site by a process termed target-site primed reverse transcription  
48 (TPRT)<sup>16,18-20</sup>.

49 L1 retrotransposition begins with transcription of full-length RC-L1 sense strand RNA using  
50 an internal RNA polymerase II promoter located within the L1 5'UTR<sup>21-23</sup>. The resultant  
51 bicistronic L1 mRNA is exported to the cytoplasm, where its translation leads to the production  
52 of ORF1p and ORF2p. ORF1p and ORF2p preferentially associate with their encoding L1  
53 RNA, by a process known as *cis*-preference<sup>24,25</sup>, to form a cytoplasmic L1 ribonucleoprotein  
54 (RNP) complex that appears necessary, but not sufficient for retrotransposition<sup>26,27</sup>.  
55 Components of the L1 RNP gain access to the nucleus by a process that does not strictly  
56 require mitotic nuclear envelope breakdown<sup>28</sup>, although recent reports suggest that  
57 components of the L1 RNP might also gain access to genomic DNA during mitotic nuclear  
58 envelope breakdown<sup>29</sup>.

59 Once in the nucleus, ORF2p EN makes a single-strand endonucleolytic nick at a  
60 consensus target sequence (e.g., 5'-TTTTT/AA-3' and related variants of that sequence) in

61 genomic DNA, generating 5'-PO<sub>4</sub> and 3'-OH groups<sup>16,17,20,30,31</sup>. Base pairing between the short  
62 stretch of thymidines in genomic DNA liberated by L1 EN cleavage and the 3' L1 poly(A) tract  
63 is thought to form a primer/template complex<sup>27,32</sup>, where the 3'-OH group of genomic DNA  
64 serves as a primer to allow ORF2p RT to generate (-) strand L1 cDNA from its associated L1  
65 RNA template<sup>16,17,19,32</sup>. How top strand genomic DNA cleavage and (+) strand L1 cDNA  
66 synthesis occurs requires elucidation, but each step likely requires activities contained within  
67 ORF2p<sup>4,33-35</sup>. The completion of TPRT results in the integration of an L1 at a new genomic  
68 location.

69 L1 retrotransposition is mutagenic and, on rare occasions, can lead to human genetic  
70 diseases<sup>4,36-39</sup>. Besides acting as an insertional mutagen, products generated during the  
71 process of L1 retrotransposition (e.g., double-stranded L1 RNAs and single-stranded L1  
72 cDNAs) are hypothesized to trigger a type I interferon (IFN) response that may contribute to  
73 inflammation and aging phenotypes<sup>40-46</sup>. However, how L1 expression contributes to the  
74 induction of a type I IFN response and whether this process plays a direct role in human  
75 diseases require elucidation.

76 Previous studies revealed that ORF1p, ORF2p, and L1 RNA can localize within  
77 cytoplasmic foci that often are in close proximity to stress granules (SGs) – dynamic  
78 membraneless cytoplasmic structures that form upon the treatment of cells with certain  
79 stressors – although it is unclear what role, if any, cytoplasmic foci play in L1 biology<sup>47-50</sup>. SGs  
80 sequester polysomes, host proteins, and cellular RNAs and are proposed to function as  
81 regulatory hubs during the cellular stress response<sup>51,52</sup>. Intriguingly, host factors that inhibit L1  
82 retrotransposition (e.g., the zinc-finger antiviral protein [ZAP] or MOV10 RNA helicase)  
83 frequently co-localize with L1 cytoplasmic foci<sup>50,53,54</sup>.

84 To further understand the suite of host factors that bind to L1 RNPs, we generated a panel  
85 of ORF1p missense mutation and tested them for their ability to: (1) be stably expressed in  
86 human cell lines; (2) reduce the formation of cytoplasmic foci; (3) impair the ability to bind L1  
87 RNA; and (4) inhibit L1 retrotransposition. These analyses led to the identification of a triple  
88 mutant, R206A/R210A/R222A (a.k.a., M8/RBM), in the ORF1p RNA binding domain<sup>12</sup>.

89 Immunoprecipitation (IP) coupled with liquid chromatography-tandem mass spectrometry  
90 (LC-MS/MS) analyses followed by Gene Ontology (GO)<sup>55</sup> and Gene Set Enrichment Analysis  
91 (GSEA)<sup>56</sup> revealed that a full-length RC-L1 containing a carboxyl-terminal epitope-tagged  
92 version of ORF1p (WT ORF1p-FLAG) preferentially associates with proteins encoded by  
93 several interferon stimulated genes (ISGs), including HERC5, HELZ2, OASL, DDX60L, and  
94 IFIT1. Detailed analyses revealed that HERC5, HELZ2, and OASL overexpression inhibits the  
95 retrotransposition of engineered L1s in cultured cells and that each protein appears to act at  
96 different steps in the L1 retrotransposition cycle. Finally, we report that HELZ2 preferentially  
97 recognizes RNA sequences and/or RNA structures within the L1 5'UTR to destabilize L1 RNA  
98 and that HELZ2 overexpression reduced the ability of engineered L1 RNAs to induce IFN- $\alpha$   
99 expression.

## 100 **Results**

### 101 Construction of a panel of ORF1p missense mutations

102 To refine the role of ORF1p domains necessary for L1 retrotransposition and/or  
103 cytoplasmic foci formation, we generated a panel of ORF1p alanine missense mutations in a  
104 full-length human RC-L1 expression construct that expresses a version of ORF1p containing  
105 a FLAG epitope tag at its carboxyl-terminus (**Fig. 1a**, pJM101/L1.3FLAG)<sup>5,50</sup>. Mutations were  
106 generated in the following ORF1p regions: (1) M1: a conserved pair of amino acids  
107 (N157A/R159A) important for ORF1p cytoplasmic foci formation and L1 retrotransposition<sup>48</sup>;  
108 (2) M2: a pair of amino acids predicted to play a role in ORF1p trimerization<sup>57</sup> (R117A/E122A);  
109 (3) M3 and M4: amino acids proposed to mediate the coordination of chloride ions in the coiled-  
110 coil domain to stabilize ORF1p homotrimer formation<sup>12</sup> (N142A and R135A, respectively); (4)  
111 M5: a putative ORF1p protein-protein interaction surface that may interact with host factors  
112 through its acidic patch<sup>12</sup> (E116A/D123A); (5) M6-M9: amino acids required for ORF1p RNA  
113 binding activity<sup>12,26,49</sup> (K137A/K140A, R235A, R206A/R210A/R211A, and R261A,  
114 respectively); and (6) M10: an amino acid thought to decrease nucleic acid chaperone  
115 activity<sup>49</sup> (Y282A). The relative position of each mutation in the ORF1p crystal structure<sup>12</sup> and  
116 the putative functions of the wild type amino acids are shown in **Supplementary Figs. 1 and**  
117 **2a.**

118

### 119 ORF1p RNA-binding is critical for ORF1p cytoplasmic foci formation

120 Western blot analyses, using an antibody that recognizes the ORF1p FLAG epitope tag,  
121 revealed that each of the ORF1p mutant constructs could be expressed in human U-2 OS  
122 osteosarcoma, HeLa-JVM cervical cancer, and HEK293T embryonic kidney cell lines (**Fig.**  
123 **1b and Supplementary Fig. 2b**). We observed a severe reduction in the steady state level of  
124 ORF1p in the M1 mutant, as well as an alteration in the electrophoretic mobility of ORF1p in  
125 the M5 mutant, when compared to the WT ORF1p-FLAG control in each cell line  
126 (**Supplementary Fig. 2b**). The steady state levels of the M9 and M10 ORF1p mutant proteins  
127 appeared to be reduced in the HeLa-JVM and HEK293T cell lines, but not in the U-2 OS cell

128 line, when compared to the WT ORF1p-FLAG control (**Supplementary Fig. 2b**).

129 We next assayed whether the ORF1p mutations affected L1 retrotransposition efficiency.  
130 Briefly, each of the full-length WT pJM101/L1.3FLAG and mutant ORF1p derivatives (mutants  
131 M1 to M10) constructs contain an *mneol* retrotransposition indicator cassette within their  
132 3'UTR, ensuring the G418-resistant foci will only arise upon the completion of a single round  
133 of retrotransposition<sup>17</sup>. The L1 retrotransposition efficiency was calculated by counting the  
134 resultant number of G418-resistant foci, which was normalized to the transfection efficiency,  
135 upon completion of the assays<sup>17,58,59</sup> (**Figs. 1c and 1d; see Methods**).

136 The M1, M2, M5, M8, and M9 mutants exhibited severely reduced L1 retrotransposition  
137 efficiencies when compared to the positive control (*i.e.*, >90% the levels of pJM101/L1.3FLAG).  
138 By comparison, the M6, M7, and M10 mutants only exhibited a ~60 to 70% decrease in L1  
139 retrotransposition efficiency, whereas the M3 and M4 mutants had no discernable effect on  
140 L1 retrotransposition efficiency, when compared to the pJM101/L1.3FLAG positive control  
141 (**Supplementary Fig. 2c**). A construct harboring a missense mutation within the ORF2p  
142 reverse transcriptase domain (D702A) served as a negative control. The above data suggest  
143 that the putative trimerization, RNA-binding, nucleic acid chaperone, and ORF1p protein-  
144 binding domains are important for L1 retrotransposition<sup>11,12,17,25,49</sup>. Because the M3 and M4  
145 mutants did not show a reduction in L1 retrotransposition efficiency, these data suggest that  
146 single point mutations in the putative chloride-ion coordinating sites (R135A or N142A) are not  
147 sufficient to destabilize ORF1p trimerization when compared to either the M2 mutant or the  
148 G132I/R135I/N142I triple mutant used in a previous study<sup>12</sup>.

149 We next focused our analyses on the M2, M5, and M8 mutants because their respective  
150 versions of ORF1p are stably expressed in HeLa-JVM cells despite severely reducing L1  
151 retrotransposition efficiency. To determine whether the M2, M5, and M8 mutant ORF1p  
152 proteins localize to cytoplasmic foci, we established a U-2 OS cell line that expresses a  
153 doxycycline-inducible stress granule protein, G3BP1, which is tagged at its amino terminus  
154 with a mCherry fluorescent protein (mCherry-G3BP1)<sup>60</sup> (**Supplementary Fig. 3a**). The U-2  
155 OS cells were transfected with either the WT (pJM101/L1.3FLAG), M2, M5, or M8 mutant

156 ORF1p derivatives and ORF1p-FLAG was visualized ~48 hours post-transfection using an  
157 anti-FLAG primary antibody and Alexa Fluor 488-conjugated anti-mouse IgG secondary  
158 antibody (see Methods). The M2 and M5 mutants were able to form cytoplasmic foci at  
159 comparable numbers and intensities relative to the WT control (**Supplementary Fig. 3b**). An  
160 increase in size of the ORF1p cytoplasmic foci and the co-localization of ORF1p with the stress  
161 granule marker mCherry-G3BP1 was further enhanced upon arsenite treatment  
162 (**Supplementary Fig. 3c**). By comparison, the M8 ORF1p RNA binding mutant exhibited a  
163 severe reduction in the percentage of cells containing ORF1p cytoplasmic foci (~15% of cells)  
164 when compared to U-2 OS cells expressing either the WT, M2, or M5 constructs (~80% of  
165 cells) even though it was stably expressed in HeLa-JVM, U-2 OS, and HEK293T cells (**Figs.**  
166 **1b, 1e, and 1f; Supplementary Figs. 2b, 3b, 3c, and 3d**). RNA-immunoprecipitation (RNA-  
167 IP) experiments confirmed that the M8 mutant was impaired for its ability to bind L1 RNA when  
168 compared to WT ORF1p (**Fig. 1g. and see below**), which is consistent with the previous  
169 study<sup>12</sup>.

170 To confirm that the M8 ORF1p protein exhibited reduced RNA binding, we transfected the  
171 pJM101/L1.3FLAG (ORF1p-FLAG) or pALAF008\_L1.3FLAG\_M8 (M8/RBM-FLAG)  
172 expression constructs into HeLa-JVM cells and immunoprecipitated (IP) the resultant ORF1p  
173 complexes using an anti-FLAG antibody (**Fig. 2a**). Control western blot experiments revealed  
174 a similar level of WT and M8/RBM ORF1p-FLAG in whole cell extracts and  
175 immunoprecipitates from the HeLa-JVM whole cell extracts cells, but not in a negative control  
176 transfected with an L1 expression vector lacking the FLAG epitope tag (**Fig. 2b**). Moreover,  
177 the Poly(A) Binding Protein Cytoplasmic 1 (PABPC1) was robustly detected in IP reactions  
178 conducted with WT ORF1p-FLAG cell extracts, but was severely reduced in IP reactions  
179 conducted with M8/RBM ORF1p-FLAG L1 cell extracts (**Fig. 2b**), which is consistent with  
180 previous studies that found the association between ORF1p and PABPC1 requires RNA<sup>50,61</sup>.  
181 Thus, the above data suggest that the M2, M5, and M8 mutants each produce similar steady  
182 state levels of ORF1p and reduce L1 retrotransposition efficiencies. However, cytoplasmic foci  
183 formation depends on the ability of ORF1p to bind RNA (M8 mutant). Given these data, we



184 focused our subsequent studies on the WT ORF1p-FLAG and M8/RBM-FLAG proteins (herein  
185 called the RNA Binding Mutant [RBM]).

186

187 *Immune-related proteins associate with the WT ORF1p complex*

188 To identify cellular proteins that differentially interact with the WT ORF1p-FLAG and  
189 M8/RBM-FLAG protein complexes, we conducted immunoprecipitation followed by liquid  
190 chromatography-tandem mass spectrometry (IP/LC-MS/MS) analyses (**Fig. 2c; see Source**  
191 **Data.xlsx file**). Proteins that exhibited five or more peptide matches to the UniProt database  
192 (<https://www.uniprot.org/>) then were subjected to gene ontology (GO) analysis. “Viral  
193 transcription” was the most statistically significant enriched PANTHER GO term with the  
194 lowest false discovery rate (FDR) identified in the WT ORF1p-FLAG IP/LC-MS/MS  
195 experiments (**Fig. 2d and Supplementary Table 1**); “viral gene expression” represented the  
196 third most enriched GO term (**Fig. 2d**). Analysis of the M8/RBM-FLAG IP/LC-MS/MS data did  
197 not return any significant GO term enrichments. Thus, there was a significant enrichment of  
198 proteins encoded by viral process-related genes in the WT ORF1p-FLAG vs. the M8/RBM-  
199 FLAG IP/LC-MS/MS analyses (**Fig. 2d; FDR<0.05**).

200 We next performed Gene Set Enrichment Analysis (GSEA) followed by leading edge  
201 analysis to determine if there was an enrichment of hallmark gene sets (Molecular Signatures  
202 Database [MsigDB]) from the proteins identified in the WT ORF1p-FLAG vs. M8/RBM-FLAG  
203 IP/LC-MS/MS experiments (**see Methods**). These analyses identified two interferon-related  
204 gene sets (interferon gamma and interferon alpha responses), which exhibited normalized  
205 enrichment score (NES) of ~1.6 and ~1.4, respectively, among the top five most significantly  
206 enriched gene sets in the WT ORF1p-FLAG vs. that M8/RBM-FLAG data (**Fig. 2e and**  
207 **Supplementary Table 2, see Methods**).

208 The overexpression of engineered L1s previously was reported to modestly induce the  
209 type I IFN response<sup>42,45,46,62</sup>. Thus, we tested whether there was a difference in IFN- $\alpha$  induction  
210 in HEK293T cells transfected with either pJM101/L1.3FLAG (WT ORF1p-FLAG),  
211 pJM105/L1.3 (reverse transcriptase deficient [RT-]), or pALAF008\_L1.3FLAG\_M8 (M8/RBM-

212 FLAG). Expression of the WT ORF1p-FLAG or RT-deficient mutant construct each led to a  
213 moderate induction (~2.5-fold increase) of IFN- $\alpha$  transcription (**Fig. 2f**). By comparison,  
214 M8/RBM-FLAG expression induced a more significant (~4-fold increase) in IFN- $\alpha$  transcription,  
215 when compared to a mock control (**Fig. 2f**). Notably, the L1 RNA levels of the mutants were  
216 similar to the WT L1 (using a primer set that amplified the *mneol* retrotransposition reporter  
217 cassette) (**Fig. 2f**). Because the expression of each construct upregulates IFN- $\alpha$  expression,  
218 the data suggest that L1 RNA, but not L1 cDNA or L1 retrotransposition *per se*, are responsible  
219 for the modest induction of type I IFN expression.

220

### 221 Proteins produced by Interferon-Stimulated Genes (ISGs) as potential L1 regulators

222 A number of proteins expressed from interferon stimulated genes (ISGs) have been  
223 reported to influence L1 and/or Alu retrotransposition. These proteins include: (1) MOV10, an  
224 RNA helicase<sup>53,63,64</sup>; (2) ADAR1, a double-stranded RNA-specific adenosine deaminase<sup>65</sup>; (3)  
225 APOBEC3A, 3B, 3C, 3F, and, for Alu, APOBEC3G, paralogs of the apolipoprotein B editing  
226 complex enzyme catalytic polypeptide-like 3 containing cytidine deaminase activity<sup>66-73</sup>; (4)  
227 TREX1, a three prime repair exonuclease<sup>141,74,75</sup>; (5) ZAP, a zinc-finger antiviral protein<sup>50,54</sup>;  
228 (6) SAMHD1, a sterile alpha motif (SAM) domain and histidine-aspartate (HD) domain-  
229 containing protein<sup>176-78</sup>; (7) RNase H2<sup>79,80</sup>; and (8) RNaseL, a protein that is activated by 2',5'-  
230 oligoadenylate (2-5A) synthetase (OAS) to enzymatically degrade L1 RNA<sup>81</sup>. Thus, we  
231 hypothesized that the ISG proteins associated with L1 RNPs may directly regulate L1  
232 retrotransposition and/or L1-mediated IFN- $\alpha$  expression.

233 To test the above hypothesis, we screened the top 300 proteins that associated with WT  
234 ORF1p-FLAG in our IP/LC-MS/MS analyses using the interferome database  
235 ([www.interferome.org](http://www.interferome.org))<sup>82</sup>. We used a strict threshold to identify proteins that exhibited a >10-  
236 fold increase in expression upon type I IFN induction, leading to the identification of seven  
237 proteins. Two proteins, ADAR1 and ZAP, previously were reported to inhibit L1  
238 retrotransposition<sup>50,54,65</sup>. We reasoned the other five proteins, DDX60L, HELZ2, HERC5, IFIT1  
239 and OASL, might also be involved in the regulation of L1 retrotransposition (**Fig. 3a**). Notably,

240 these proteins were enriched in the WT ORF1-FLAG IP/LC-MS/MS data vs. M8/RBM-FLAG  
241 by at least 2-fold (**Fig. 3b**).

242 We next relaxed our threshold and screened the interferome database for WT ORF1p-  
243 FLAG associated proteins exhibiting a 5-fold increase in expression upon type I IFN induction  
244 (**Supplementary Table 3**) and then used StringDB (<https://string-db.org/>)<sup>83</sup> to test for possible  
245 associations among the putative type I IFN interferon inducible proteins that preferentially  
246 associated with WT ORF1p-FLAG<sup>45,46</sup>. Most of the ISG candidates exhibiting a >10-fold  
247 increase in expression upon type I IFN induction (*i.e.*, ADAR1, ZAP, DDX60L, HELZ2, HERC5,  
248 IFIT1 and OASL), with the exception of HELZ2 and DDX60L, were annotated as antiviral  
249 defense proteins in UniProt (<https://www.uniprot.org/>) (**Fig. 3c**, red circles; FDR,  $4.5 \times 10^{-8}$ ,  
250 interaction strength, 1.55). Thus, a network of antiviral ISG proteins may regulate L1 RNA  
251 and/or L1 RNP dynamics.

252 To validate the interaction of proteins identified in the above analyses with WT ORF1p-  
253 FLAG, we conducted additional co-IP experiments. Briefly, pJM101/L1.3FLAG (WT ORF1p-  
254 FLAG) was co-transfected into HEK293T cells with individual ISG protein expression vectors  
255 (HELZ2, IFIT1, DDX60L, OASL, and HERC5) containing three copies of a MYC epitope tag  
256 at their respective carboxyl-termini. An anti-FLAG primary antibody then was used to  
257 immunoprecipitate associated proteins from HEK293T whole cell extracts and an anti-MYC  
258 antibody was used to confirm associations between WT ORF1p-FLAG and the candidate ISG  
259 proteins. WT ORF1p-FLAG co-immunoprecipitated HERC5, OASL, IFIT1, DDX60L, and  
260 HELZ2 (**Fig. 3d**).

261

### 262 *The ISG proteins, HELZ2, OASL, and HERC5 inhibit L1 retrotransposition*

263 To determine whether ectopic overexpression of the identified ISG proteins affect L1  
264 retrotransposition, we co-transfected HeLa-JVM or HEK293T cells with a WT human L1  
265 expression construct containing either a *mblast1* (pJJ101/L1.3) or *mEGFP1* (cepB-gfp-L1.3)  
266 retrotransposition indicator cassette and the carboxy-terminal MYC epitope-tagged HELZ2,  
267 IFIT1, DDX60L, OASL, or HERC5 expression vectors. L1 retrotransposition efficiencies then

268 were determined by counting the resultant number of blasticidin-resistant foci or EGFP-  
269 positive cells (**Fig. 1c, see Methods**). A MOV10 expression vector, also containing a carboxyl-  
270 terminal 3x MYC epitope tag served as a positive control. The overexpression of DDX60L and  
271 IFIT1 did not significantly inhibit L1 retrotransposition in HeLa-JVM (**Figs. 4a and 4b**) or  
272 HEK293T cells (**Supplementary Figs. 4a and 4b**), although we note the expression of  
273 DDX60L was barely detected by western blot in either cell line (**Fig. 4b and Supplementary**  
274 **Fig. 4b**). By comparison, overexpression of HERC5, HELZ2, and OASL reduced  
275 retrotransposition by at least 2-fold in the *mblastI*-based L1 retrotransposition assay  
276 conducted in HeLa-JVM cells (**Fig. 4a**) and by ~90% in the *mEGFP1*-based L1  
277 retrotransposition assay conducted in HEK293T cells (**Supplementary Fig. 4a**).

278

#### 279 Some ISG proteins affect ORF1p and L1 mRNA levels

280 To further understand how ISG proteins might inhibit L1 retrotransposition, we co-  
281 transfected a full-length RC-L1 (pTMF3) and either the HELZ2, IFIT1, DDX60L, OASL, HERC5,  
282 or MOV10 expression vectors into HeLa-JVM or HEK293T cells and examined whether the  
283 ISG proteins affected ORF1p and/or L1 RNA expression. Western blot analysis revealed a  
284 similar data trend in HeLa-JVM and HEK293T cells: the steady state ORF1p levels were  
285 significantly decreased by co-expression of HERC5, HELZ2, and MOV10, were modestly  
286 reduced by the co-expression of OASL, but were not changed by the co-expression of IFIT1  
287 or DDX60L (**Fig. 4b and Supplementary Fig. 4b**). RT-qPCR analyses, using a probe set that  
288 specifically recognizes the SV40 polyA signal of the plasmid-expressed L1 RNA, revealed that  
289 HELZ2 significantly reduced L1 RNA levels in HeLa-JVM cells (**Fig. 4c**, ~90% reduction of the  
290 WT L1 control). MOV10 co-expression resulted in a ~70% reduction in L1 RNA when  
291 compared to the WT L1 control, which is consistent with previous reports<sup>64,84</sup>.

292 We next tested whether the co-transfection of pJM101/L1.3FLAG (WT ORF1p-FLAG) with  
293 the individual ISG protein expression vectors (*i.e.*, HELZ2, HERC5, OASL, and MOV10)  
294 affected ORF1p-FLAG cytoplasmic foci formation in HeLa-JVM cells (**Figs. 4d and 4e**).  
295 Greater than 70% of transfected cells expressing WT ORF1p-FLAG exhibited cytoplasmic foci

296 (Fig. 4e), which is consistent with previous results<sup>49</sup> (see Supplementary Fig. 3d). Co-  
297 expression of HERC5 did not dramatically affect ORF1p cytoplasmic foci formation in HeLa-  
298 JVM cells (Fig. 4e, ~55% of cells contained ORF1p cytoplasmic foci that associated with  
299 HERC5). By comparison, the co-expression of HELZ2, OASL, and MOV10 resulted in a  
300 decrease in ORF1p-FLAG cytoplasmic foci (Fig. 4e, ~30%, ~15%, and ~5% of cells,  
301 respectively) and very few of these foci associated with the relevant ISG protein (Fig. 4e). In  
302 aggregate, these data suggest: (1) HERC5 destabilizes ORF1p, but does not affect its cellular  
303 localization; (2) OASL mainly impairs ORF1p cytoplasmic foci formation; and (3) HELZ2  
304 reduces the levels of L1 RNA, ORF1p, and ORF1p cytoplasmic foci formation. Thus, different  
305 ISGs appear to affect different steps of the L1 retrotransposition cycle.

306

#### 307 The HELZ2 helicase activity is important for inhibition of L1 retrotransposition

308 HELZ2 contains two putative helicase domains (helicase 1 and helicase 2) that flank a  
309 putative exoribonuclease RNase II/R (RNB) domain (Fig. 5a and Supplementary Fig. 5a).  
310 Because proteins containing a RNB domain often possess 3' to 5' single-strand  
311 exoribonuclease activity<sup>85,86</sup>, we aligned the protein sequences of RNB-containing proteins  
312 from human, yeast and *E. coli* to identify evolutionarily conserved aspartic acid residues, which  
313 when mutated, are predicted to impair exoribonuclease activity<sup>85-87</sup> (Supplementary Fig. 5b).  
314 We mutated three conserved aspartic acid residues in HELZ2 to asparagine residues  
315 (D1346N/D1354N/D1355N) and assayed whether this triple mutant affects L1  
316 retrotransposition. This triple mutant generally only had minor effects (*i.e.*, less than 2-fold) on  
317 L1 retrotransposition efficiency in HeLa-JVM and HEK293T cells when compared to the WT  
318 HELZ2 control (Supplementary Figs. 5c and 5d).

319 We next tested whether mutations in the putative HELZ2 helicase domains affect L1  
320 retrotransposition. We mutated conserved amino acids in the Walker A and Walker B boxes  
321 thought to be required for ATP binding (WA1 [K550A] and WA2 [K2180A]) or ATP hydrolysis  
322 (WB1 [E668A] and WB2 [E2361A]), respectively<sup>88-90</sup>. The WA1 mutant demonstrated a low,  
323 but not statistically significant decrease in L1 retrotransposition efficiency in HeLa-JVM cells

324 **(Fig. 5b)**, but exhibited a significant decrease in L1 retrotransposition in HEK293T cells **(Fig.**  
325 **5c)**. The WA2 did not significantly inhibit L1 retrotransposition in HeLa-JVM cells **(Fig. 5b)**,  
326 but showed a low level of inhibition in HEK293T cells **(Fig. 5c)**. The WA1&2 double mutant  
327 was unable to inhibit L1 retrotransposition in either HeLa-JVM or HEK293T cells **(Figs. 5b**  
328 **and 5c)**. By comparison, the WB1 mutant retained the ability to inhibit L1 retrotransposition in  
329 HeLa-JVM and HEK293T cells **(Figs. 5d and 5e, respectively)**, whereas the WB2 mutant did  
330 not inhibit L1 retrotransposition in HeLa-JVM cells **(Fig. 5d)** and only exhibited minor inhibition  
331 in HEK293T cells **(Fig. 5e)**. In general, the WA2 and WB2 mutants consistently exhibited a  
332 less severe inhibition of L1 retrotransposition when compared to WA1 and WB1 mutants,  
333 suggesting the importance of the helicase 2 domain in the inhibition of retrotransposition.

334 Additional experiments revealed that the WA1 mutant reduced both ORF1p-T7 and L1  
335 RNA levels in HeLa-JVM cells **(Fig. 5f)**; the WA2 and WA1&2 double mutant partially reduced  
336 L1 RNA levels in comparison to the WT control, but did not affect the steady state levels of  
337 the ORF1p-T7 protein **(Fig. 5f)**. Importantly, we did not observe a noticeable reduction in the  
338 steady state levels of the HELZ2 mutant proteins **(Fig. 5f, bottom panel)**, suggesting that the  
339 effects on L1 retrotransposition are not due to mutant HELZ2 protein instability **(Fig. 5f)**. Finally,  
340 the WA1&2 double mutant did not affect the ability of ORF1p-FLAG to localize to cytoplasmic  
341 foci when compared to WT HELZ2 **(Figs. 4d and 4e)**. A union of the above data suggest that  
342 the HELZ2 helicase activity has a more pronounced effect than the HELZ2 RNase activity on  
343 L1 retrotransposition and that mutations in the HELZ2 helicase domains affect L1 RNA stability,  
344 ORF1p levels, and ORF1p cytoplasmic localization to different extents.

345

#### 346 *Knockdown of endogenous HELZ2 enhances L1 retrotransposition*

347 To determine whether endogenous HELZ2 could inhibit L1 retrotransposition, we used  
348 small interfering RNAs (siRNAs) to reduce HELZ2 and MOV10 levels in HeLa-JVM cells.  
349 Control RT-qPCR experiments revealed a ~70% and ~80% knockdown of HELZ2 and MOV10  
350 RNAs, respectively, when compared to a non-targeting siRNA control **(Fig. 5g, middle panel)**;  
351 *mEGFP*-based assays revealed a ~1.5-fold and ~3-fold increase in L1 retrotransposition

352 efficiency in the siHELZ2 and siMOV10 treated cells, respectively (**Fig. 5g**, bottom panel).  
353 Thus, endogenous HELZ2 may also suppress L1 retrotransposition.

354

#### 355 HELZ2 recognizes L1 RNA independent of RNP formation

356 We further investigated the mechanism of association between ORF1p-FLAG and HELZ2.  
357 Treatment of the ORF1p RNP complex with RNase A abolished the ORF1p-FLAG/HELZ2  
358 interaction, suggesting that HELZ2, like PABPC1, associates with ORF1p in an RNA-  
359 dependent manner<sup>50,61</sup> (**Fig. 6a**).

360 To test whether L1 RNP formation is required for the association between ORF1p-FLAG  
361 and HELZ2, we compared the effects of HELZ2 overexpression on L1 RNA and ORF1p  
362 protein abundance in HeLa-JVM cells transfected with either pJM101/L1.3FLAG (ORF1p-  
363 FLAG) or pALAF008\_L1.3FLAG\_M8 (M8/RBM-FLAG). RT-qPCR using a probe set that  
364 specifically recognizes the SV40 polyA signal of plasmid expressed L1 RNA and western blot  
365 experiments conducted with an anti-FLAG antibody revealed a marked reduction in L1 RNA  
366 (~80% reduction) and ORF1p levels in both the WT ORF1p-FLAG or M8/RBM ORF1p-FLAG  
367 transfected cells upon HELZ2 overexpression when compared to controls (**Fig. 6b**). Thus,  
368 HELZ2 overexpression appears to destabilize L1 RNA independent of WT L1 RNP formation.  
369

#### 370 HELZ2 overexpression modestly inhibits Alu retrotransposition

371 To examine whether HELZ2 overexpression affects Alu retrotransposition, HeLa-HA  
372 cells<sup>69</sup> were transfected with an expression plasmid that contains both an engineered Alu-  
373 element harboring a *neo*-based retrotransposition indicator cassette (*neo*<sup>Tet</sup>)<sup>91</sup> and a  
374 monocistronic L1 ORF2p-3xFLAG expression cassette<sup>92</sup>. HELZ2 overexpression reduced Alu  
375 retrotransposition by ~2-fold when compared to the respective controls (**Fig. 6c**). Additional  
376 experiments revealed that HELZ2 overexpression reduced L1 ORF2p and Alu RNA levels by  
377 ~80% and ~35%, respectively (**Fig. 6d**); the reduction in L1 RNA levels led to a corresponding  
378 decrease L1 ORF2p protein levels (see below). Notably, the reductions in the levels of  
379 monocistronic and full-length L1 RNAs upon HELZ2 overexpression were quite similar (*i.e.*,

380 **Fig. 6b vs. Fig. 6d**), suggesting that the observed decrease in Alu retrotransposition mainly  
381 results from the HELZ2-dependent destabilization of L1 RNA.

382

383 *HELZ2 recognizes the 5'UTR of L1 RNA to reduce both L1 RNA levels and IFN- $\alpha$  induction*

384 HELZ2 overexpression adversely affects L1 and Alu retrotransposition. Intriguingly, the  
385 sequences of the L1 5' and 3'UTRs are shared between the full-length L1 and monocistronic  
386 ORF2p expression constructs used in these assays. However, the monocistronic ORF2p  
387 expression cassette that drives Alu retrotransposition contains a deletion of a conserved  
388 polypurine tract ( $\Delta$ ppt) in the L1 3'UTR, which does not dramatically affect L1  
389 retrotransposition<sup>17</sup>. Thus, we hypothesized that HELZ2 may recognize either RNA sequences  
390 or RNA structures in the L1 5'UTR and/or 3'UTR $\Delta$ ppt to destabilize L1 RNA.

391 To test the above hypothesis, we deleted the L1 5'UTR sequence from a WT L1 expression  
392 construct (pTMF3) that also contains the 3'UTR $\Delta$ ppt sequence and drove L1 expression solely  
393 from the cytomegalovirus immediate-early (CMV) promoter (**Fig. 6e**, L1 [ $\Delta$ 5'UTR]; a.k.a.  
394 pTMF3\_ $\Delta$ 5UTR). As an additional control, we also replaced the L1.3-coding sequences  
395 (*ORF1* and *ORF2*) with a firefly luciferase gene in the same WT L1 construct (**Fig. 6e**, Fluc;  
396 a.k.a. pL1[5&3UTRs]\_Fluc). Co-transfection of HeLa-JVM cells with either pTMF3,  
397 pTMF3\_ $\Delta$ 5UTR, or Fluc and HELZ2 followed by RT-qPCR (*i.e.*, using probe sets that  
398 specifically recognize the SV40 polyA signal of the plasmid, pTMF3, pTMF3\_ $\Delta$ 5UTR, or Fluc  
399 RNAs) (**see Methods**) revealed that HELZ2 overexpression significantly reduced the RNA  
400 levels derived from the L1 5'UTR-containing constructs irrespective of their downstream  
401 sequences (**Fig. 6e**). Consistently, independent experiments in HeLa-JVM cells revealed that  
402 HELZ2 overexpression does not affect steady state RNA or protein levels produced from an  
403 inducible Tet-On firefly luciferase or human L1 ORF<sub>45</sub> construct that lacks the L1 5'UTR<sup>45</sup>  
404 (**Supplementary Figs. 6a and 6b**). Together, these data suggest that HELZ2 destabilizes L1  
405 RNA by recognizing RNA sequences and/or RNA structure(s) within the L1 5'UTR.

406 Because previous experiments reported that L1 RNA induces a type I IFN response<sup>40,42,46</sup>  
407 (**Fig. 2f**), we next tested whether the destabilization of L1 RNA by HELZ2 leads to a decrease



408 in L1-mediated IFN- $\alpha$  induction. Strikingly, HELZ2 overexpression reduced the level of L1-  
409 dependent IFN- $\alpha$  induction to less than 5% of the control pJM101/L1.3FLAG construct (**Fig.**  
410 **6f**, compare the leftmost and middle data graphs). Notably, this level of IFN- $\alpha$  induction was  
411 even lower than that observed in cells transfected with only the pCEP4 empty vector (**Fig. 6f**,  
412 compare the center and rightmost data graphs), raising the possibility that HELZ2  
413 overexpression may also reduce the stability of endogenous immunogenic RNAs to reduce  
414 basal levels of IFN- $\alpha$  induction.

415

## 416 Discussion

417 Previous studies identified antiviral factors involved in innate immune responses that  
418 inhibit L1 retrotransposition by destabilizing L1 RNA, L1 proteins, L1 RNPs, and perhaps L1  
419 (-) strand cDNAs (see Results: “*Proteins produced by Interferon-Stimulated Genes (ISGs) as*  
420 *potential L1 regulators*” for a complete list). In this study, we uncovered five additional ISG  
421 proteins that are enriched in IP/LC-MS/MS experiments conducted with WT ORF1p, but not  
422 the M8/RBM ORF1p mutant, which exhibits both attenuated RNA binding and L1 cytoplasmic  
423 foci formation.

424 HELZ2, HERC5, and OASL were predominantly localized in the cytoplasm, and upon  
425 overexpression, inhibited the retrotransposition of an engineered wild-type L1 (**Fig. 4a;**  
426 **Supplementary Fig. 4a**). Overexpression experiments further revealed that HELZ2 interacts  
427 with ORF1p in an RNA-dependent manner (**Figs. 3d and 6a**) and reduces the steady state  
428 levels of engineered L1 RNA, ORF1p, and ORF1p cytoplasmic foci formation (**Figs. 4b, 4c,**  
429 **4d, and 4e; Supplementary Fig. 4b**). By comparison, HERC5 destabilizes ORF1p, but does  
430 not affect its cellular localization, whereas OASL mainly impairs ORF1p cytoplasmic foci  
431 formation. Thus, ISG proteins that predominantly act in the cytoplasm have the potential to  
432 inhibit L1 retrotransposition by acting at various steps in the L1 retrotransposition cycle (**Fig.**  
433 **7**).

434 HELZ2 is a poorly characterized protein containing two putative RNA helicase domains  
435 that surround a centrally-located exoribonuclease (RNB) domain. RNB domains typically are  
436 flanked by cold shock and S1 RNA binding domains; however, HELZ2 appears to lack these  
437 domains<sup>93</sup>. A more in depth analysis of HELZ2 revealed similarities to other RNB-containing  
438 proteins, such as the prokaryotic cold shock inducible protein RNase R, which can degrade  
439 highly structured RNAs through its concerted helicase and 3' to 5' exoribonuclease  
440 activities<sup>94,95</sup>. Thus, it is tempting to suggest that HELZ2 might function in a similar stepwise  
441 manner, where its helicase activity initially unwinds L1 RNA secondary structures, allowing  
442 their subsequent degradation by the HELZ2 3' to 5' exoribonuclease activity (**Fig. 7**). Indeed,  
443 a HELZ2 helicase double mutant (WA1&2), but not a putative RNase-deficient mutant

444 (dRNase), abolished the ability of HELZ2 to inhibit L1 retrotransposition (**Figs. 5b, 5c, 5d, and**  
445 **5e; Supplementary Figs. 5c and 5d**), suggesting the HELZ2 helicase activity likely functions  
446 upstream of the single-strand 3' to 5' exonuclease activity to degrade L1 RNA. Because  
447 ORF1p-binding to L1 RNA is proposed to stabilize L1 RNAs<sup>12,96</sup>, we speculate that some  
448 regions of L1 RNA might be protected from HELZ2 degradation because of ORF1p RNA  
449 binding, but that other regions that have complex RNA secondary structures may be  
450 preferential HELZ2 targets. If so, HELZ2 might primarily destabilize these regions of L1 RNA  
451 to inhibit retrotransposition.

452 Previous studies demonstrated CpG DNA methylation of the L1 5'UTR is a potent means  
453 to inhibit endogenous L1 transcription<sup>97-99</sup>. DNA sequences within the 5'UTRs of older L1s  
454 (e.g., members of the L1PA3 and L1PA4 subfamilies) also bind repressive Krüppel-associated  
455 Box-containing Zinc-Finger Protein 93 (ZNF93) to repress their transcription and deletion of  
456 these repressive sequences allowed the subsequent amplification of the L1PA2 and human-  
457 specific L1PA1 subfamilies in the human genome<sup>100,101</sup>. Notably, HELZ2 was discovered as a  
458 transcriptional co-activator of peroxisome proliferator-activated receptor alpha (PPAR- $\alpha$ )<sup>102</sup>  
459 and PPAR- $\gamma$ <sup>103</sup>. Because the L1 5'UTR also contains multiple transcription factor binding sites  
460 that drive L1 expression, it remains possible that HELZ2 might repress L1 transcription<sup>21,22,104-</sup>  
461 <sup>106</sup>.

462 Intriguingly, we found that L1 RNAs containing 5'UTR sequences are particularly  
463 susceptible to HELZ2-mediated RNA degradation (**Figs. 6e and 6f; Supplementary Fig. 6**),  
464 thereby representing a potential post-transcriptional mechanism by which RNA sequences  
465 and/or RNA structures within the 5'UTR are targeted by host proteins to inhibit L1  
466 retrotransposition. Future studies are needed to test whether HELZ2 acts to destabilize the  
467 polypurine tract within the L1 3'UTR (which is absent from our expression vectors)<sup>107</sup>.

468 The overexpression of a WT L1 construct led to a modest upregulation of IFN- $\alpha$  expression,  
469 which previously was reported to contribute to inflammation, autoimmunity, and aging  
470 phenotypes<sup>40,42-46</sup>. A similar upregulation of IFN- $\alpha$  expression was observed upon the  
471 overexpression of an RT-deficient L1, and was slightly more pronounced upon the

472 overexpression of the the ORF1p M8/RBM mutant. These data suggest that L1 RNA and or  
473 the L1-encoded proteins, but not intermediates generated during TPRT (*e.g.*, L1 cDNAs), are  
474 responsible for IFN- $\alpha$  upregulation in our experiments. Consistently, HELZ2 overexpression  
475 abolished L1-mediated IFN- $\alpha$  upregulation and also reduced IFN- $\alpha$  expression below baseline  
476 levels in our experiments, hinting that HELZ2 may also reduce the expression of endogenous  
477 immunogenic RNA(s).

478 Because L1s lack an extracellular phase in their replication cycle, one can posit that L1s  
479 would benefit from not triggering an innate immune response. That being stated, why the  
480 overexpression of the ORF1p M8/RBM mutant led to a more robust, yet modest, induction of  
481 IFN- $\alpha$  expression than the WT and RT-deficient L1s (**Fig. 2f**) requires further study. It is  
482 possible that ORF1p L1 RNA binding and/or the sequestration of L1 RNPs within cytoplasmic  
483 foci establishes effectively shields L1 RNAs from eliciting a interferon response and that the  
484 attenuated ability of the ORF1p M8/RBM mutant to bind L1 RNA could lead to higher levels of  
485 unprotected L1 RNA substrates that act as “triggers,” contributing to IFN- $\alpha$  expression (**Fig.**  
486 **7**). Indeed, these data are consistent with a recent study, which reported that depletion of the  
487 Human Silencing Hub (HUSH complex) correlates with the derepression of primate-specific  
488 L1s and that the resultant L1 double-stranded RNAs may drive physiological or  
489 autoinflammatory responses in human cells<sup>46</sup>. Clearly, future studies are necessary to  
490 elucidate how and if L1 double-stranded RNAs, or perhaps single-stranded cDNAs, play  
491 important contributory roles to innate immune activation and human autoimmune  
492 diseases<sup>108,109</sup>.

493

494

495

496

497

498

499

## 500 **Materials and Methods**

### 501 **Cell lines and cell culture conditions**

502 The human HeLa-JVM cervical cancer-derived<sup>17</sup>, U-2 OS osteosarcoma-derived, and  
503 HEK293T embryonic carcinoma-derived cell lines were grown in Dulbecco's Modified Eagle  
504 Medium (DMEM) (Nissui, Tokyo, Japan) supplemented with 10% fetal bovine serum (FBS)  
505 (Gibco, Amarillo, Texas, United States or Capricorn Scientific, Ebsdorfergrund, Germany),  
506 0.165% NaHCO<sub>3</sub>, 100 U/mL penicillin G (Sigma-Aldrich, St. Louis, MO, United States), 100  
507 µg/mL streptomycin (Sigma-Aldrich), and 2 mM L-glutamine (Sigma-Aldrich). HeLa-HA cells<sup>69</sup>  
508 were grown in Minimum Essential Medium (MEM) (Gibco) supplemented with 10% FBS  
509 (Capricorn Scientific), 0.165% NaHCO<sub>3</sub>, 100 U/mL penicillin G, 100 µg/mL streptomycin, 2  
510 mM L-glutamine, and 1x MEM Non-Essential Amino Acids Solution (Nacalai, Kyoto, Japan).  
511 The cell lines were grown at 37°C in 100% humidified incubators supplied with 5% CO<sub>2</sub>. The  
512 cell lines tested negative for mycoplasma contamination using a PCR-based method using  
513 the VenorGeM Classic Mycoplasma Detection Kit (Sigma-Aldrich). STR-genotyping was  
514 performed to confirm the identity of HeLa-JVM, HeLa-HA, U-2 OS, and HEK293T cells.

515

### 516 **Plasmid construction**

517 Creation of the ORF1p-FLAG mutant constructs: Briefly, the pJM101/L1.3FLAG<sup>7,50</sup> plasmid  
518 was used, unless otherwise indicated, to construct the plasmids in this study. Briefly,  
519 pJM101/L1.3FLAG DNA was used as a PCR template in conjunction with oligonucleotide  
520 primers containing the respective ORF1p mutations to generate the ORF1 mutants. The  
521 amplified PCR products and pJM101/L1.3FLAG plasmid DNA then were digested with *NotI*  
522 and *AgeI* and ligated using the DNA Ligation Kit Mighty Mix (TaKaRa Bio, Shiga, Japan) at  
523 16°C for 30 minutes. The resultant ligation products were transformed into *E. coli* XL1-Blue  
524 cells and plated on Luria Broth (LB) agar plates containing 50 µg/mL ampicillin. The resultant  
525 plasmids then were sequenced from the *NotI* to *AgeI* restriction sites to ensure the integrity of  
526 the mutants.

527 Creation of the mCherry/GeBP1, ISG fusion protein, and HELZ2 mutant constructs: The  
528 *G3BP1* cDNA sequence was amplified from a HeLa-JVM total cDNA library and concurrently  
529 inserted in-frame with a *mCherry*-coding sequence into a lentiviral vector (pCW)<sup>110</sup> using the  
530 in-Fusion Cloning Kit (TaKaRa Bio). The *HERC5*, *HELZ2*, *OASL*, *MOV10*, *IFIT1*, and *DDX60L*  
531 cDNAs were amplified from either a HeLa-JVM or HEK293T total cDNA library and inserted  
532 into the *NotI* and *XhoI* restriction sites in the pCMV-3Tag-9 vector (Agilent Technologies,  
533 Santa Clara, CA, United States) using either the Gibson Assembly Cloning Kit (New England  
534 Biolabs, Ipswich, MA, United States) or in-Fusion Cloning Kit. To generate *HELZ2* mutations,  
535 whole plasmid DNAs were amplified using primers harboring the intended mutations in  
536 separate reactions to avoid the formation of primer dimers. The template DNA then was  
537 digested with *DpnI* at 37°C for 1 hour followed by heat inactivation at 80°C for 20 minutes. The  
538 PCR amplified DNA fragments were, mixed, annealed, and transformed into *E. coli* XL1-Blue  
539 cells.

540

#### 541 **Plasmids used in this study**

542 For mammalian cell experiments, plasmids were purified using the GenElute HP Plasmid  
543 Midiprep Kit (Sigma-Aldrich). All of the L1 expression plasmids contain a retrotransposition-  
544 competent L1 (L1.3, Genbank: L19088). The amino acid residues of ORF1p or ORF2p were  
545 counted from the first methionine of the L1.3 ORF1p and L1.3 ORF2p, respectively. The  
546 plasmids used in the study are listed below:

547 *pCEP4 (Invitrogen)*: the mammalian expression vector backbone used for cloning  
548 pJM101/L1.3 and pJJ101/L1.3 variants.

549 *phrGFP-C (Agilent technology)*: contains a humanized Renilla *GFP* gene whose expression  
550 is driven by a cytomegalovirus immediate-early (CMV) promoter.

551 *pJM101/L1.3*: was described previously<sup>5,58</sup>. This plasmid contains the full-length L1.3, cloned  
552 into the pCEP4 vector plasmid. L1 expression is driven by the CMV and L1.3 5'UTR promoters.  
553 The *mneol* retrotransposition cassette was inserted into the L1.3 3'UTR as described

554 previously<sup>17</sup>.

555 pJM101/L1.3FLAG: was described previously<sup>50</sup>. This plasmid is a derivative of pJM101/L1.3  
556 that contain a single copy of the *FLAG* epitope tag fused in-frame to the 3' end of the L1.3  
557 *ORF1* sequence.

558 pJM105/L1.3: was described previously<sup>25</sup>. This plasmid is a derivative of pJM101/L1.3 that  
559 contains a D702A mutation in the ORF2p reverse transcriptase active site.

560 pTMF3: was described previously<sup>92</sup>. This plasmid is a derivative of pJM101/L1.3. A *T7 gene10*  
561 epitope tag was fused in-frame to the 3' end of the *ORF1* sequence and three copies of a  
562 *FLAG* epitope tag were fused to the 3' end of the *ORF2* sequence. This plasmid lacks the  
563 polypurine sequence in the L1 3'UTR.

564 pTMF3 Δ5UTR: is a derivative of pTMF3 that contains a deletion of the L1.3 5'UTR sequence.

565 pL1(5&3UTRs) Fluc: is a derivative of pTMF3 that contains a firefly luciferase gene in place  
566 of the L1.3-coding region.

567 pJJ101/L1.3: was described previously<sup>111</sup>. This plasmid is similar to pJM101/L1.3, but  
568 contains an *mblast1* retrotransposition indicator cassette within the L1.3 3'UTR.

569 pJJ105/L1.3: was described previously<sup>111</sup>. This plasmid is a derivative of pJJ101/L1.3 that  
570 contains a D702A mutation in the ORF2p reverse transcriptase active site.

571 pALAF001 L1.3FLAG M1: is a derivative of pJM101/L1.3FLAG that contains the N157A and  
572 R159A mutations in ORF1p, which abolished ORF1p cytoplasmic foci formation<sup>48</sup>.

573 pALAF002 L1.3FLAG M2: is a derivative of pJM101/L1.3FLAG that contains the R117A and  
574 E122A mutations in ORF1p, which are proposed to adversely affect ORF1p trimerization<sup>57</sup>.

575 pALAF003 L1.3FLAG M3: is a derivative of pJM101/L1.3FLAG that contains the N142A  
576 mutation in ORF1p, which is proposed to bind a chloride ion to stabilize ORF1p trimerization<sup>12</sup>.

577 pALAF004 L1.3FLAG M4: is a derivative of pJM101/L1.3FLAG that contains the R135A  
578 mutation in ORF1p, which is proposed to bind a chloride ion to stabilize ORF1p trimerization<sup>12</sup>.

579 *pALAF005 L1.3FLAG M5*: is a derivative of pJM101/L1.3FLAG that contains the E116A and  
580 D123A mutations in ORF1p, which are proposed to act as a binding site for host factors<sup>12</sup>.

581 *pALAF006 L1.3FLAG M6*: is a derivative of pJM101/L1.3FLAG that contains the K137A and  
582 K140A mutations in ORF1p, which reduces the ability of ORF1p to bind L1 RNA<sup>12</sup>.

583 *pALAF007 L1.3FLAG M7*: is a derivative of pJM101/L1.3FLAG that contains the R235A  
584 mutation in ORF1p, which reduces the ability of ORF1p to bind L1 RNA<sup>49</sup>.

585 *pALAF008 L1.3FLAG M8 (RBM)*: is a derivative of pJM101/L1.3FLAG that contains the  
586 R206A, R210A, and R211A mutations in ORF1p, which severely impair the ability of ORF1p  
587 to bind L1 RNA<sup>12</sup>.

588 *pALAF009 L1.3FLAG M9*: is a derivative of pJM101/L1.3FLAG that contains the R261A  
589 mutation in ORF1p, which reduces the ability of ORF1p to bind L1 RNA<sup>49</sup>.

590 *pALAF010 L1.3FLAG M10*: is a derivative of pJM101/L1.3FLAG that contains the Y282A  
591 mutation in ORF1p, which is proposed to reduce nucleic chaperone activity<sup>49</sup>.

592 *pALAF012 mCherry-G3BP1 pCW*: contains the *mCherry* sequence fused in frame to a  
593 human *G3BP1* cDNA in a lentiviral expression vector, pCW<sup>110</sup>. The puromycin resistant gene  
594 and reverse tetracycline-controlled trans-activator (rtTA) coding regions are in-frame and are  
595 expressed by a human PGK promoter; puromycin and rtTA are separated by a self-cleaving  
596 T2A peptide so that each protein can be expressed from the bicistronic transcript. The  
597 *mCherry-G3BP1* cDNA is expressed from a doxycycline inducible (Tet-On) promoter. In the  
598 presence of doxycycline, rtTA can adopt an altered confirmation that allows it to bind the Tet-  
599 On promoter to allow *mCherry-G3BP1* expression.

600 *pALAF015 hHELZ2L-3xMYC*: contains the canonical human *HELZ2* long isoform cDNA  
601 (2649 bps) cloned into pCMV-3Tag-9 (Agilent Technologies), which allows the expression of  
602 a *HELZ2-3xMYC* fusion protein. The CMV promoter drives *HELZ2-3xMYC* expression.

603 *pALAF016 hIFIT1-3xMYC*: contains the human *IFIT1* cDNA cloned into pCMV-3Tag-9, which  
604 allows the expression of a *hIFIT1-3xMYC* fusion protein. The CMV promoter drives *IFIT1-*



605 *3xMYC* expression.

606 *pALAF021\_hDDX60L-3xMYC*: contains the human *DDX60L* cDNA cloned into pCMV-3Tag-  
607 9, which allows the expression of a hDDX60L-3xMYC fusion protein. The CMV promoter  
608 drives *DDX60L-3xMYC* expression.

609 *pALAF022\_hOASL-3xMYC*: contains the human *OASL* cDNA cloned into pCMV-3Tag-9,  
610 which allows the expression of the *OASL-3xMYC* fusion protein. The CMV promoter drives  
611 *OASL-3xMYC* expression.

612 *pALAF023\_hHERC5-3xMYC*: contains the human *HERC5* cDNA cloned into pCMV-3Tag-9,  
613 which allows the expression of a *HERC5-3xMYC* fusion protein. The CMV promoter drives  
614 *HERC5-3xMYC* expression.

615 *pALAF024\_hMOV10-3xMYC*: contains the human *MOV10* cDNA cloned into pCMV-3Tag-9,  
616 which allows the expression of a *MOV10-3xMYC* fusion protein. The CMV promoter drives  
617 *MOV10-3xMYC* expression.

618 *cepB-gfp-L1.3*: was described previously<sup>92</sup>. The plasmid contains the full-length L1.3 with an  
619 *EGFP* retrotransposition reporter cassette, *mEGFP1*. L1.3 expression is augmented by the L1  
620 5'UTR promoter. The plasmid backbone also contains a *blasticidin S-deaminase (BSD)*  
621 selectable marker driven by the SV40 early promoter.

622 *cepB-gfp-L1.3RT(-)*: was described previously<sup>92</sup>. The plasmid is identical to *cepB-gfp-L1.3* but  
623 contains a D702A mutation in the ORF2p reverse transcriptase active site.

624 *cepB-gfp-L1.3RT(-) intronless*: was described previously<sup>92</sup>. The plasmid is similar to *cepB-gfp-*  
625 *L1.3RT(-)* except that the intron in the *mEGFP1* retrotransposition cassette was removed,  
626 allowing *EGFP* expression in the absence of L1.3 retrotransposition.

627 *cep99-gfp-L1.3*: was described previously<sup>92</sup>. The plasmid is similar to *cepB-gfp-L1.3* but  
628 contains the puromycin resistant gene instead of the blasticidin resistance gene as a  
629 selectable marker.

630 *cep99-gfp-L1.3RT(-) intronless*: was described previously<sup>92</sup>. The plasmid is similar to cep99-  
631 *gfp-L1.3* except that it contains the D702A mutation in the ORF2p reverse transcriptase  
632 domain and the intron in the *mEGFP1* retrotransposition cassette was removed, allowing  
633 EGFP expression in the absence of L1.3 retrotransposition.

634 *pALAF025 hHELZ2L-3xMYC WA1*: is a derivative of pALAF015\_hHELZ2L-3xMYC that  
635 contains the K550A mutation in the Walker A motif of the N-terminal HELZ2 helicase domain,  
636 which is predicted to inactivate the ATP binding ability of the helicase domain<sup>88</sup>.

637 *pALAF026 hHELZ2L-3xMYC WA2*: is a derivative of pALAF015\_hHELZ2L-3xMYC that  
638 contains the K2180A mutation in the Walker A motif of the carboxyl-terminal HELZ2 helicase  
639 domain, which is predicted to inactivate the ATP binding ability of the helicase domain<sup>88</sup>.

640 *pALAF027 hHELZ2L-3xMYC WA1&2*: is a derivative of pALAF015\_hHELZ2L-3xMYC that  
641 contains the K550A and K2180A mutations in the Walker A motifs of both HELZ2 helicase  
642 domains<sup>88</sup>.

643 *pALAF028 hHELZ2L-3xMYC WB1*: is a derivative of pALAF015\_hHELZ2L-3xMYC that  
644 contains the E668A mutation in the Walker B motif of the N-terminal helicase domain of HELZ2,  
645 which is predicted to inactivate the ATP hydrolysis activity of the helicase domain<sup>88</sup>.

646 *pALAF029 hHELZ2L-3xMYC WB2*: is a derivative of pALAF015\_hHELZ2L-3xMYC that  
647 contains the E2361A mutation in the Walker B motif of the C-terminal helicase domain of  
648 HELZ2, which is predicted to inactivate the ATP hydrolysis activity of the helicase domain<sup>88</sup>.

649 *pALAF030 hHELZ2L-3xMYC dRNase*: is a derivative of pALAF015\_hHELZ2L-3xMYC that  
650 contains the D1346N, D1354N, and D1355N mutations in the RNB domain of HELZ2, which  
651 is predicted to inactivate the RNase activity of the RNB domain<sup>87</sup>.

652 *psPAX2*: is a lentivirus packaging vector that was a gift from Didier Trono (Addgene plasmid  
653 # 12260). The plasmid expresses the HIV-1 gag and pol proteins.

654 *pMD2.G*: is a lentivirus envelope expression vector that was a gift from Didier Trono (Addgene  
655 plasmid # 12259). The plasmid expresses a viral envelope protein and the vesicular stomatitis

656 virus G glycoprotein (VSV-G).

657 pcDNA6: was described previously<sup>92</sup>. It is a derivative of pcDNA6/TR (Invitrogen, Carlsbad,  
658 CA, United States) and contains the *blasticidin S-deaminase (BSD)* selectable marker but  
659 lacks the TetR gene. This plasmid was made by Dr. John B. Moldovan (University of Michigan  
660 Medical School).

661 pCMV-3Tag-8-Barr: is a human  $\beta$ -*Arrestin* expression plasmid. The human *ARRB2* cDNA was  
662 cloned into pCMV-3Tag-8 (Agilent Technologies). The plasmid contains three copies of a  
663 *FLAG* epitope tag fused in-frame to the 3' end of the *ARRB2* cDNA. The CMV promoter drives  
664 *ARRB2-3xFLAG* expression.

665 pTMO2F3\_Alu: is plasmid that co-expresses Alu and a monocistronic version of L1 ORF2p  
666 that contains the L1 5'UTR. The monocistronic *ORF2* coding sequence contains three copies  
667 of an in-frame *FLAG* epitope tag sequence at its 3' end; the CMV promoter augments the  
668 expression of *ORF2-3xFLAG*. The plasmid also contains an AluY element whose expression  
669 is driven by a 7SL promoter. The Alu element contains the *neo*<sup>Tet</sup> retrotransposition indicator  
670 cassette<sup>91</sup>, which was inserted upstream of the Alu poly(dA) tract. This arrangement allows  
671 the quantification of Alu retrotransposition efficiency by counting the resultant number of G418-  
672 resistant foci. This plasmid lacks the polypurine sequence in the L1 3'UTR.

673 pTMO2F3D145AD702A\_Alu: is identical to pTMO2F3\_Alu but contains the D145A and D702A  
674 mutations, which inactivate the ORF2p endonuclease and reverse transcriptase activities,  
675 respectively.

676 pTMO2H3\_Alu: is a derivative of pTMO2F3\_Alu plasmid where the *FLAG* epitope tag was  
677 replaced with three copies of *HA* epitope tag sequence.

678 pSBtet-RN: was a gift from Eric Kowarz<sup>45,112</sup> (Addgene plasmid # 60503). The plasmid  
679 contains a firefly luciferase (*Fluc*) gene with an upstream Tet-On inducible promoter.

680 pDA093: was a gift from Kathleen Burns<sup>45</sup> (Addgene plasmid # 131390). This plasmid is similar  
681 to pSBtet-RN but the luciferase gene was replaced with the human L1 *ORFeus* (*ORF1* and

682 *ORF2*) sequence lacking the 5' or 3'UTR.

683 *pCMV(CAT)T7-SB100*: was a gift from Zsuzsanna Izsvak<sup>113</sup> (Addgene plasmid # 34879). This  
684 plasmid contains a hyperactive variant of the *Sleeping Beauty* transposase, whose expression  
685 is driven by the CMV promoter.

686

## 687 **Western blots**

688 HeLa-JVM, U-2 OS, or HEK293T cells were seeded in a 6-well tissue culture plate  
689 (Greiner, Frickenhausen, Germany) at  $2 \times 10^5$  cells per well. On the following day, the cells were  
690 transfected with 1  $\mu$ g of DNA (1  $\mu$ g of an L1-expressing plasmid or 0.5  $\mu$ g of the L1-expressing  
691 plasmid and 0.5  $\mu$ g of either a pCMV-3Tag-8-Barr control or ISG-expressing plasmid) using 3  
692  $\mu$ L of FuGENE HD transfection reagent (Promega, Madison, WI, United States) and 100  $\mu$ L  
693 of Opti-MEM (Gibco) according to the protocol provided by the manufacturer. The medium  
694 was replaced with fresh DMEM approximately 24 hours post-transfection (day 1). The cells  
695 were harvested using 0.25% trypsin (Gibco) at days 2 through 9 post-transfection (depending  
696 on the specific experiment). The transfected cells were enriched using 100  $\mu$ g/mL of  
697 hygromycin B (Wako, Osaka, Japan), which was added to the media two days post-  
698 transfection and replaced with fresh DMEM containing hygromycin B daily. After collection by  
699 trypsinization, the cells were pelleted by centrifugation at 300 x *g* for 5 minutes. Then, the cells  
700 were washed twice with cold 1x PBS, flash-frozen in liquid nitrogen, and kept at -80°C.

701 For cell lysis, the cells were incubated in Radio-ImmunoPrecipitation Assay (RIPA) buffer  
702 (10 mM Tris-HCl [pH 7.5], 1 mM EDTA, 1% TritonX-100, 0.1% sodium deoxycholate, 0.1%  
703 SDS, 140 mM NaCl, 1x cOmplete EDTA-free protease inhibitor cocktail [Roche, Mannheim,  
704 Germany]) at 4°C for 30 minutes. The cell debris was pelleted at 12,000 x *g* for 5 minutes and  
705 the supernatant was collected. The protein concentration was measured using the Protein  
706 Assay Dye Reagent Concentrate (Bio-Rad, Richmond, CA, United States) and all of the  
707 samples for each experiment were normalized to the same concentration. The protein lysate  
708 was mixed at an equal volume with 3x SDS sample buffer (187.5 mM Tris-HCl [pH 6.8], 30%

709 glycerol, 6% SDS, 0.3M DTT, 0.01% bromophenol blue) and boiled at 105°C for 5 minutes.  
710 Twenty micrograms of total protein lysates for all samples were separated using sodium  
711 dodecyl sulphate-polyacrylamide gel electrophoresis (SDS-PAGE). Proteins on the gel were  
712 transferred onto a Immobilon-P, 0.45 µm pore, polyvinylidene difluoride (PVDF) transfer  
713 membrane (Merck Millipore, Billerica, MA, United States) using 10 mM CAPS buffer (3-  
714 [cyclohexylamino]-1-propanesulfonic acid [pH 11]) in a Mini Trans-Blot Electrophoretic  
715 Transfer Cell tank (Bio-Rad) according to protocol provided by the manufacturer. The transfer  
716 was performed at 4°C at 50V for 16 hours. After the transfer was completed, the membrane  
717 was incubated with Tris-NaCl-Tween (TNT) buffer (0.1 M Tris-HCl [pH 7.5], 150 mM NaCl,  
718 0.1% Tween 20) containing 3% skim milk (Nacalai) for 30 minutes. The membranes then were  
719 washed with TNT buffer, cut into strips, and incubated with the relevant primary antibodies in  
720 TNT buffer at 4°C overnight. The next day, the membranes were washed four times with TNT  
721 buffer with five minutes interval at room temperature and incubated with HRP-conjugated  
722 secondary antibodies in TNT buffer containing 0.01% SDS at room temperature for an hour.  
723 The membranes were washed four times with TNT buffer with five minutes interval at room  
724 temperature and the signals were detected with the Chemi-Lumi One L (Nacalai)  
725 chemiluminescence reagent using a LAS-3000 Imager (Fujifilm, Tokyo, Japan), LAS-4000  
726 Imager (Fujifilm), or a FUSION Solo S Imager (Vilber-Lourmat, Marne-la-Vallee, France).

727 Primary antibodies and dilutions (in parentheses):

728 Mouse monoclonal anti-FLAG M2 antibody (1/5000), (Sigma-Aldrich, F1804, RRID:  
729 [AB\\_262044](#))

730 Mouse monoclonal anti-MYC antibody (1/5000), (Cell Signaling Technology, 9B11, RRID:  
731 [AB\\_331783](#))

732 Rabbit polyclonal anti-PABPC1 antibody (1/5000), (Abcam, ab21060, RRID: [AB\\_777008](#))

733 Mouse monoclonal anti-GAPDH antibody (1/5000), (Millipore, MAB374, RRID: [AB\\_2107445](#))

734 Mouse monoclonal anti-Actin antibody (1/5000), (Millipore, MAB1501, RRID: [AB\\_2223041](#))

735 Rabbit polyclonal anti-T7-tag antibody (1/5000), (Cell Signaling Technology, D9E1X, RRID:

736 AB\_2798161)

737 Goat polyclonal anti-Luciferase antibody (1/2000), (Promega, G7451, RRID: AB\_430862)

738 Mouse monoclonal anti-ORF1p (4H1) antibody (1/2000), (Millipore, MABC1152)

739 Mouse monoclonal anti-eIF3 p110 (B-6) antibody (1/5000), (Santa Cruz Biotechnology, sc-  
740 74507, RRID: AB\_1122487)

741 Secondary antibodies and dilutions (in parentheses):

742 Sheep polyclonal anti-mouse HRP-conjugated Whole antibody (1/5000), (GE Healthcare,  
743 NA931-1ML, RRID: AB\_772210)

744 Goat polyclonal anti-rabbit HRP-conjugated Whole antibody (1/5000), (Cell Signaling  
745 Technology, 7074, RRID: AB\_2099233)

746 Donkey polyclonal anti-rabbit HRP-conjugated Whole antibody (1/5000), (GE Healthcare,  
747 NA934-1ML, RRID: AB\_772206)

748 Donkey polyclonal anti-goat HRP-conjugated Whole antibody (1/5000), (Santa Cruz  
749 Biotechnology, sc-2020, RRID: AB\_631728)

750

## 751 **Immunofluorescence**

752 Cell transfection and fixation: HeLa-JVM or U-2 OS cells were plated on 18 mm glass  
753 coverslips (Matsunami Glass, Osaka, Japan) coated with Alcian Blue 8GX (Sigma-Aldrich) in  
754 12-well tissue culture plates (Greiner) at  $2.5 \times 10^4$  cells per well in DMEM (with 1.0  $\mu\text{g}/\text{mL}$  of  
755 doxycycline in mCherry-G3BP1-expressing U-2 OS cells). After 24 hours, the cells were  
756 transfected with 0.5  $\mu\text{g}$  of plasmid DNA (0.5  $\mu\text{g}$  of the L1-expressing plasmid  
757 [pJM101/L1.3FLAG, pALAF002, pALAF005, or pALAF008] or 0.25  $\mu\text{g}$  of pJM101/L1.3FLAG  
758 and 0.25  $\mu\text{g}$  of either a pCMV-3Tag-8-Barr control or ISG-expression plasmid) using 1.5  $\mu\text{L}$  of  
759 FuGENE HD transfection reagent and 50  $\mu\text{L}$  of Opti-MEM according to protocol provided by  
760 the manufacturer. Approximately 24 hours post-transfection, the medium was replaced with  
761 fresh DMEM and 1.0  $\mu\text{g}/\text{mL}$  of doxycycline was added into the medium for mCherry-G3BP1-  
762 expressing U-2 OS cells. Approximately 48 hours post-transfection, the cells were washed

763 with 1x PBS and fixed with 4% paraformaldehyde (PFA) at room temperature for 15 minutes.  
764 Prior to cell fixation, the cells were treated with DMSO (Sigma-Aldrich) or 0.5 mM sodium  
765 meta-arsenite (Sigma-Aldrich) for one hour. The fixed cells then were washed with 1x PBS  
766 three times and kept at 4°C until cell permeabilization.

767 Immunostaining: The resultant cells were permeabilized with 0.2% Triton X-100 and 0.5%  
768 normal donkey serum (NDS) for 5 minutes. The cells were washed once with 1x PBS and  
769 twice with PBST (1x PBS and 0.1% Tween 20) following permeabilization. The primary  
770 antibodies (1/1000 dilution in PBST) containing 0.5% NDS were applied onto the coverslip  
771 and incubated for 45 minutes at room temperature. The cells were washed with PBST three  
772 times after the primary antibody incubation. The secondary antibodies (1/250 dilution in PBST)  
773 containing 0.5% NDS and 0.1 µg/mL of 4', 6-diamidino-2-phenylindole (DAPI) were applied  
774 onto the coverslip and incubated for 45 minutes at room temperature. The cells were washed  
775 with PBST three times followed by multiple rinses with water. The excess liquid was removed,  
776 and the glass coverslips were fixed on glass slides with 3 µL of VECTASHIELD (Vector  
777 Laboratories, Burlingame, CA, United States).

778 Immunofluorescence: Images were captured using the DeltaVision Elite microscope (Cytiva,  
779 Marlborough, MA, United States). Six z-stack images with 1 µm thickness difference were  
780 captured and projected into a single image with the max intensity for each image. For ORF1p-  
781 FLAG probed with the Alexa 488-conjugated antibody or MYC-tagged proteins probed with  
782 the Cy5-conjugated antibody, the FITC/AF488 or Cy5/AF647 channel was used, respectively.  
783 mCherry-G3BP1 fluorescence was detected through the AF594/mCherry channel. In the  
784 ORF1p foci counting experiments, the same signal intensity threshold was applied to all  
785 samples and only cells with visible ORF1p signals were counted as positive cells. Only cells  
786 that displayed clear cytoplasmic ORF1p signals with foci distinguishable from the background  
787 were counted as an L1 foci-positive cells.

788 Primary antibodies and dilutions (in parentheses):

789 Mouse monoclonal anti-FLAG M2 antibody (1/1000), (Sigma-Aldrich, F3165, RRID:

790 AB\_259529)

791 Rabbit polyclonal anti-FLAG antibody (1/1000), (Sigma-Aldrich, F7425, RRID: AB\_439687)

792 Mouse monoclonal anti-MYC antibody (1/1000), (Cell Signaling Technology, 9B11, RRID:

793 AB\_331783)

794 Secondary antibodies and dilutions (in parentheses):

795 Donkey anti-mouse polyclonal Alexa Fluor 488 IgG (H+L) (1/250), (Thermo Fisher Scientific,

796 A-21202, RRID: AB\_141607)

797 Donkey anti-rabbit polyclonal Alexa Fluor 488 IgG (H+L) (1/250), (Thermo Fisher Scientific,

798 A-21206, RRID: AB\_2535792)

799 Goat polyclonal anti-mouse Cy5 (1/250), (Jackson ImmunoResearch Labs, 115-175-146,

800 RRID: AB\_2338713)

801

## 802 **Lentiviral transduction**

803 HEK293FT cells were plated in a 10-cm tissue culture dish at  $1 \times 10^6$  cells per plate. On the  
804 following day, the cells were transfected with 5  $\mu$ g plasmid DNA (2.5  $\mu$ g of pALAF012, 1.875  
805  $\mu$ g of psPAX2, and 0.625  $\mu$ g of pMD2.G) using 15  $\mu$ L of 1 mg/mL transfection grade linear  
806 polyethylenimine hydrochloride (MW 40,000) (PEI-MAX-40K) (Polysciences, Warrington, PA,  
807 United States) in 500  $\mu$ L of Opti-MEM. Approximately 24 hours post-transfection, the medium  
808 was replaced with fresh DMEM. The medium containing the virus was collected 48 hours post-  
809 transfection and filtered through a 0.45  $\mu$ m polyethersulfone (PES) filter (Merck Millipore,  
810 Billerica, MA).

811 To generate the inducible mCherry-G3BP1-expressing U-2 OS cell line,  $2 \times 10^5$  cells per  
812 well were plated in a 6-well tissue culture plate. On the next day, the medium was replaced  
813 with virus-containing medium supplemented with 8  $\mu$ g/mL of polybrene (Sigma-Aldrich).  
814 Approximately 24 hours post-viral treatment, the medium was replaced with fresh DMEM.  
815 From the second-day post-viral treatment onwards, the media was replaced with fresh DMEM  
816 containing 1  $\mu$ g/mL puromycin every three days until the non-transduced cells were dead.



817

## 818 **Construction of cell lines expressing Tet-On Luciferase and human L1 ORFeus**

819 HeLa-JVM cells were plated in 6-well plates at  $2 \times 10^5$  cells per well. On the following day,  
820 the cells were transfected with 500 ng of plasmid DNA (pSBtet-RN or pDA093) and 50 ng of  
821 a sleeping beauty plasmid (pCMV[CAT]T7-SB100) using 2.0  $\mu$ L of FuGENE HD transfection  
822 reagent and 100  $\mu$ L of Opti-MEM according to the protocol provided by the manufactures.  
823 After ~24 hours, the medium was replaced with fresh DMEM. G418 (Nacalai) selection (500  
824  $\mu$ g/mL) began ~48 hours post-transfection for 1 week; the G418 containing media was  
825 replaced daily. Five percent of the total living cells were transferred into 10-cm tissue culture  
826 dishes and the media was replaced daily with 500  $\mu$ g/mL G418 until the cells reached ~90%  
827 confluency. The cells then were trypsinized and resuspended in PBS containing 2% FBS and  
828 dTomato-positive cells were sorted using a BD FACSAria III flow cytometer (BD Biosciences,  
829 San Jose, CA, United States) to obtain clonal cell lines. Western blotting was used to screen  
830 the resultant cell lines for doxycycline dosage-dependent expression of Luciferase or human  
831 L1 ORFeus.

832

## 833 **L1 and Alu Retrotransposition Assays**

834 L1 or Alu cultured cell retrotransposition assays were performed as described with  
835 modifications<sup>17,54,58,59,91,114</sup>.

836 In retrotransposition assays using the *mneol* retrotransposition indicator cassette,  $2 \times 10^5$   
837 HeLa-JVM or HeLa-HA cells per well were seeded in 6-well tissue culture plates. On the  
838 following day, the cells were transfected with 1  $\mu$ g of DNA (0.5  $\mu$ g of pJM101L1.3/FLAG or its  
839 variants and 0.5  $\mu$ g of phrGFP-C for the L1 retrotransposition assay) or 1  $\mu$ g of DNA (0.5  $\mu$ g  
840 of pTMO2F3\_Alu or phrGFP-C and 0.5  $\mu$ g of pCMV-3Tag-8-Barr control, pALAF015 [HELZ2],  
841 or pALAF024 [MOV10] for the Alu retrotransposition assay) using 3  $\mu$ L FuGENE HD and 100  
842  $\mu$ L of Opti-MEM according to the protocol provided by the manufacturer. The medium was  
843 replaced with fresh DMEM (HeLa-JVM) or MEM (HeLa-HA), respectively ~24 hours post-  
844 transfection (day 1). On day 3 post-transfection, to check transfection efficiency, each

845 duplicate was collected, fixed with 0.5% paraformaldehyde, and subjected to flow cytometry  
846 analysis using BD Accuri C6 Plus Flow Cytometer (BD Biosciences). The FITC channel was  
847 used to determine the number of hrGFP-expressing cells out of 10, 000 cells as a transfection  
848 efficiency control. The medium in the remaining transfectants was replaced daily with fresh  
849 DMEM or MEM containing 500 µg/mL G418 from day 3 onwards. The resultant colonies were  
850 fixed at day 10-14 post-transfection using the fixation solution (1x PBS containing 0.2%  
851 glutaraldehyde and 2% formaldehyde). The cells were stained with 0.1% crystal violet. The  
852 resultant number of foci were counted and normalized to the transfection efficiency. Please  
853 note: the HEK293T cells are G418-resistant and could not be used in *mneol* based  
854 retrotransposition assays.

855 In retrotransposition assays using the *mblastl* retrotransposition indicator cassette,  $5 \times 10^4$   
856 HeLa-JVM cells per well were seeded in 6-well tissue culture plates. After ~24 hours, the cells  
857 were transfected with 1 µg of DNA (0.5 µg of pJJ101/L1.3 and 0.5 µg of an ISG-expressing  
858 plasmid or pCMV-3Tag-8-Barr) using 3 µL of FuGENE HD in 100 µL of Opti-MEM. For the  
859 viability control,  $5 \times 10^3$  HeLa-JVM cells per well were seeded in 6-well tissue culture plates.  
860 After ~24 hours, the cells were transfected with 1 µg of DNA (0.5 µg of pcDNA6 and 0.5 µg of  
861 an ISG-expressing plasmid or pCMV-3Tag-8-Barr) using 3 µL of FuGENE HD in 100 µL of  
862 Opti-MEM. Approximately 24 hours post-transfection (day 1), the medium was changed with  
863 fresh DMEM. Blasticidin selection (10 µg/mL of blasticidin S HCl) began from day 4 post-  
864 transfection and the media containing blasticidin was replaced every three days until day 8-  
865 10. The resultant colonies were fixed using the fixation solution and stained with 0.1% crystal  
866 violet. The resultant number of foci were counted and normalized to the resultant number of  
867 pcDNA6-transfected foci.

868 In retrotransposition assays using the *mEGFP1* retrotransposition indicator cassette,  $2 \times 10^5$   
869 HeLa-JVM or HEK293T cells per well were seeded in 6-well tissue culture plates. On the next  
870 day, the cells were transfected with 1 µg of DNA (0.5 µg of cepB-gfp-L1.3 or cepB-gfp-  
871 L1.3RT[-] intronless and 0.5 µg of a pCMV-3Tag-8-Barr control or ISG-expressing plasmid)  
872 using 3 µL of FuGENE HD in 100 µL of Opti-MEM. Approximately 24 hours post-transfection

873 (day 1), the medium was replaced with fresh DMEM. Transfected cells were selected using  
874 10 µg/mL blasticidin S HCl from day 2 post-transfection, changing the media every three days.  
875 The cells were collected on day 7-8 post-transfection and the resultant EGFP positive cells  
876 were analyzed using BD Accuri C6 Plus Flow Cytometer. The FITC channel was used to count  
877 the EGFP positive cells out of 30,000 cells. The number of the EGFP-positive cells was  
878 normalized to the transfection efficiency measured by counting the number of cepB-gfp-  
879 L1.3RT(-) intronless GFP-positive cells.

880

### 881 **siRNA treatment**

882 HeLa-JVM cells were plated in 6-well tissue culture plates at  $1 \times 10^5$  cells per well. After ~24  
883 hours, 25 nM of a Dharmacon siRNA mixture (non-targeting control: ON-TARGETplus Non-  
884 targeting Pool, D-001810-10-0020; HELZ2: ON-TARGETplus HELZ2 siRNA SMARTpool, L-  
885 019109-00-0005; or MOV10: ON-TARGETplus MOV10 siRNA SMARTpool, L-014162-00-  
886 0005) were transfected using 3.75 µL of Lipofectamine RNAiMAX (Thermo Fisher Scientific,  
887 Waltham, MA, United States). Approximately 24 hours post-siRNA treatment (day 1), the  
888 medium was replaced with fresh DMEM and the cells were transfected with 0.5 µg of cepB-  
889 gfp-L1.3 or cepB-gfp-L1.3RT(-) intronless using 1.5 µL of FuGENE HD in 100 µL of Opti-MEM.  
890 Transfected cells were selected using 10 µg/mL blasticidin S HCl from day 3 post-transfection  
891 with media changes every three days. On day 8 post-transfection, the cells were harvested,  
892 washed with cold 1x PBS twice, and analyzed for EGFP expression using BD Accuri C6 Plus  
893 Flow Cytometer out of 30,000 cells. The number of the EGFP-positive cells was normalized  
894 to the transfection efficiency measured by counting the number of cepB-gfp-L1.3RT(-)  
895 intronless GFP-positive cells.

896

### 897 **Immunoprecipitation of L1 ORF1p**

#### 898 Immunoprecipitation for IP-MS:

899 HeLa-JVM cells were plated in 15-cm tissue culture dishes containing DMEM medium at  
900  $1.5 \times 10^6$  cells per dish. Three 15-cm tissue culture dishes were used for each sample

901 preparation. After ~24 hours, the cells were transfected with 15 µg of an L1-expressing  
902 plasmid (pJM101/L1.3, pJM101/L1.3FLAG or pALAF008) using 45 µL of FuGENE HD  
903 (Promega) in 1,500 µL of Opti-MEM. On the following day (day 1), the medium was replaced  
904 with fresh DMEM. From day 2 post-transfection onwards, the medium was replaced daily with  
905 fresh DMEM containing 100 µg/ml hygromycin B. On day 6 post-transfection, the cells were  
906 harvested using trypsin, washed with 1x cold PBS twice, flash-frozen with liquid nitrogen, and  
907 stored at -80°C.

908 For IP reactions, one hundred fifty microliters of Dynabeads Protein G (Invitrogen) was  
909 washed twice with PBS containing 0.5% BSA and 0.1% Triton X-100. For each sample, the  
910 beads were incubated with 15 µg of mouse monoclonal anti-FLAG M2 antibody (Sigma-Aldrich,  
911 F1804, RRID: [AB\\_262044](#)) in 1 mL of PBS containing 0.5% BSA and 0.1% Triton X-100 at  
912 4°C for 2 hours. After incubation, the antibody-conjugated beads were washed with PBS  
913 containing 0.5% BSA and 0.1% Triton X-100 twice. The beads were resuspended in Lysis150  
914 buffer (20 mM Tris-HCl [pH 7.5], 2.5 mM MgCl<sub>2</sub>, 150 mM KCl, 0.5% IGEPAL CA-630, 1 mM  
915 DTT) containing 0.2 mM phenylmethylsulfonyl fluoride (PMSF) and 1x cOmplete EDTA-free  
916 protease inhibitor cocktail before immunoprecipitation. Each cell pellet was lysed using the  
917 Lysis150 buffer containing 0.2 mM PMSF and 1x cOmplete EDTA-free protease inhibitor  
918 cocktail. The resuspended cell pellets were incubated at 4°C for 30 minutes and centrifuged  
919 at 12,000 x *g* for 5 minutes to pellet the cell debris. The supernatant was collected and  
920 incubated with antibody non-conjugated Dynabeads Protein G at 4°C for 2 hours with gentle  
921 rotation to remove non-specific protein binding. The Dynabeads were removed and the protein  
922 concentration in the pre-cleared cell lysates was quantified using Protein Assay Dye Reagent  
923 Concentrate. The same total amount of protein was used for each immunoprecipitation.  
924 Dynabeads Protein G conjugated to the anti-FLAG antibody was added to the supernatant  
925 and incubated at 4°C for 3 hours with gentle rotation. The beads were then washed five times  
926 with 200 µL of the Lysis150 buffer. The ORF1p-FLAG protein complex bound was eluted using  
927 200 µg/mL of 3xFLAG peptide (Sigma-Aldrich) in the Lysis150 buffer containing 0.2 mM PMSF  
928 and 1x cOmplete EDTA-free protease inhibitor cocktail by incubation at 4°C for 1 hour with

929 gentle rotation. This step was repeated once and the protein was precipitated overnight using  
930 cold acetone. The protein was pelleted at 12,000 x *g* at 4°C for 30 minutes, resuspended in  
931 1x SDS sample buffer and boiled at 105°C for 5 minutes.

932 Immunoprecipitation for western blotting:

933 HEK293T cells were plated in 10-cm tissue culture dishes at 3x10<sup>6</sup> cells per dish.  
934 Approximately 24 hours after plating, the cells were transfected with 4 µg of  
935 pJM101/L1.3FLAG or pJM101/L1.3 and 2 µg of ISG-expressing plasmid (pALAF015,  
936 pALAF016, pALAF021, pALAF022, pALAF023, or pALAF024) using 18 µL of 1 mg/mL PEI-  
937 MAX-40K in 500 µL of Opti-MEM. Approximately 24 hours post-transfection, the media was  
938 changed with fresh DMEM. From day 2 post-transfection onwards, the medium was replaced  
939 daily with fresh DMEM containing 100 µg/ml hygromycin B. On day 4 post-transfection, the  
940 cells were harvested with pipetting, washed with 1x cold PBS twice, flash-frozen with liquid  
941 nitrogen, and stored at -80°C for subsequent experiments.

942 For each sample, ten microliters of the Dynabeads Protein G were incubated with 1 µg of  
943 anti-FLAG M2 antibody in 50 µL of PBS containing 0.5% BSA and 0.1% Triton X-100 at 4°C  
944 for 2 hours. After incubation, the antibody-conjugated beads were washed with PBS containing  
945 0.5% BSA and 0.1% Triton X-100 twice. The beads were resuspended in Lysis150 buffer  
946 containing 0.2 mM PMSF and 1x cOmplete EDTA-free protease inhibitor cocktail before  
947 immunoprecipitation. Each cell pellet was lysed in 500 µL of the Lysis150 buffer containing  
948 0.2 mM PMSF and 1x cOmplete EDTA-free protease inhibitor cocktail. The resuspended cell  
949 pellets were incubated at 4°C for 1 hour and centrifuged at 12,000 x *g* for 5 minutes to pellet  
950 the cell debris. The supernatant was collected and 10 µL of the supernatant was saved as  
951 input. Anti-FLAG antibody-conjugated Dynabeads were added to the samples and incubated  
952 at 4°C for 4 hours with gentle rotation.

953 The RNase treatment for HELZ2-expressed samples was performed after removal of the  
954 cell lysate using 20 µg/mL of RNase A (Nippongene, Tokyo, Japan) in 100 µL of the Lysis150  
955 buffer for five minutes at 37°C. The beads then were washed four times with 100 µL of the

956 Lysis150 buffer. The beads were resuspended directly in 1x SDS sample buffer and boiled at  
957 105°C for 5 minutes except for the HELZ2-expressed samples, where the ORF1p-FLAG  
958 protein complex was eluted using 20 µL of the Lysis150 buffer containing 0.2 mM PMSF, 1x  
959 cOmplete EDTA-free protease inhibitor cocktail, and 200 µg/mL 3xFLAG peptide by incubation  
960 at 4°C for 1 hour with gentle rotation. The eluted protein was resuspended in 1x SDS sample  
961 buffer and boiled at 105°C for 5 minutes.

962

### 963 **Proteomic analysis by LC-MS/MS**

964 Mass spectrometry analysis was performed by the proteomics facility in the Graduate  
965 School of Biostudies at Kyoto University. After SDS-PAGE and visualization of the gel using  
966 PlusOne Silver Staining Kit, Protein (Cytiva) according to the protocol provided by the  
967 manufacturer, the entire gel lane from each sample was excised into 15 components. The  
968 silver stain was then removed, and the excised gel slices were incubated with sequencing-  
969 grade modified trypsin (Promega) to extract the peptides. The purified peptides then were  
970 subjected to liquid chromatography-tandem mass spectrometry (LC-MS/MS) on nano-  
971 Advance (AMR, Tokyo, Japan) and Q Exactive Plus (Thermo Fisher Scientific). The MS/MS  
972 spectra and protein scores were analyzed using the Proteome Discoverer 1.4 (Thermo Fisher  
973 Scientific) and the MASCOT server 2.5.1 (Matrix Science: <https://www.matrixscience.com/>)  
974 against UniProt Knowledgebase (UniProtKB: <https://www.uniprot.org/help/uniprotkb>). Keratin  
975 proteins were removed from all the lists. To identify the ORF1p-FLAG interacting proteins, the  
976 peptide matches for each UniProt accession number obtained from the WT L1  
977 (pJM101/L1.3FLAG)-expressing cells were compared to that of the no tag control  
978 (pJM101/L1.3) or the RBM L1 (pALAF008)-expressing cells.

979

### 980 **ORF1p crystal structure analysis**

981 The crystal structure images of ORF1p and the mutations were created using UCSF  
982 ChimeraX software 1.2.5 for Windows<sup>115</sup> based on the 2ykp pdb file<sup>12</sup>.

983

984 **GO term analysis**

985 Protein hits obtained from IP-MS with five peptide matches or more were submitted for Gene  
986 Ontology (GO) analysis using the PANTHER statistical enrichment analysis tool<sup>55</sup>  
987 (<http://pantherdb.org>). The UniProt accession ID with the respective number of peptide  
988 matches was submitted for GO biological process complete annotation data set analysis. The  
989 FDR value was used for the correction.

990

991 **GSEA Leading Edge Analysis**

992 GSEA 4.1.0 for Windows software was used for the analysis<sup>56</sup>  
993 (<http://www.broad.mit.edu/GSEA>) using the hallmark gene sets from GSEA Molecular  
994 Signatures Database (MSigDB: <https://www.gsea-msigdb.org/gsea/msigdb/>). The leading  
995 edge analysis was performed on the GSEA results using the GSEA 4.1.0 software. Peptide  
996 matches of WT ORF1p-FLAG vs. M8/RBM-FLAG were compared and the enriched gene sets  
997 were subjected to leading edge analysis. All of the UniProt accession ID hits (1255 Uniprot  
998 accession numbers) from IP-MS with the respective number of peptide matches were included  
999 in the analysis.

1000

1001 **ImageJ quantification of western blot band intensity**

1002 Using the ImageJ software tool<sup>116</sup>, identical sized rectangles were drawn for each band. The  
1003 area of intensity of the bands were generated using Plot Lanes function and calculated using  
1004 a wand (tracing) tool. The intensity of each ORF1p-T7 band was normalized to that of the  
1005 GAPDH band with respective samples. The values were displayed as ratios in comparison to  
1006 the leftmost band in the western blot image (pTMF3 and pCMV-3Tag-8-Barr control co-  
1007 transfected cells).

1008

1009 **RNA extraction and RT-qPCR**

1010 HeLa-JVM or HEK293T at  $2 \times 10^5$  cells per well were seeded in 6-well tissue culture plates.  
1011 On the following day, the cells were transfected with 1  $\mu$ g of DNA (1  $\mu$ g of an L1-expressing

1012 plasmid or 0.5  $\mu$ g of the L1-expressing plasmid and 0.5  $\mu$ g of a pCMV-3Tag-8-Barr control or  
1013 an ISG-expressing plasmid). Approximately 24 hours post-transfection (day 1), the medium  
1014 was replaced with fresh DMEM. On day 2 (HeLa-JVM and HeLa-HA) or day 4 (HEK293T)  
1015 post-transfection, the cells were washed with 1x PBS and 0.9 mL TRIzol was added directly  
1016 to each well. The RNA extractions were performed according to the protocol provided by the  
1017 manufacturer. The cells were lysed with TRIzol and transferred into new 1.5 mL tubes. One  
1018 hundred eighty microliters of chloroform was added into each tube and shaken vigorously for  
1019 15 seconds. After incubation at room temperature for 5 minutes, the samples were centrifuged  
1020 at 12,000  $\times g$  for 15 minutes at 4°C. Three hundred sixty microliters of the upper layer were  
1021 transferred into a new 1.5 mL tube and 400  $\mu$ L of 100% isopropanol was added to precipitate  
1022 the RNA. The samples were incubated at room temperature for 10 minutes. Next, RNA was  
1023 pelleted at 12,000  $\times g$  for 30 minutes. The purified RNA then was washed with 75% cold  
1024 ethanol and centrifuged at 10,000  $\times g$  for 5 minutes. The RNA pellet was dried at room  
1025 temperature. Once dried, 30  $\mu$ L of RNase-free H<sub>2</sub>O was added and incubated at 55°C for 10  
1026 minutes to dissolve RNA. The resultant RNA was then treated with RNase-free DNase Set  
1027 (QIAGEN) according to the protocol provided by the manufacturer with some minor  
1028 modifications. Five microliters of DNase I (15 K units, TaKaRa Bio), 0.2 U/ $\mu$ L of ribonuclease  
1029 inhibitor (porcine liver) (TaKaRa Bio) in 44.5  $\mu$ L of the RNase-free Buffer RDD was added to  
1030 each sample. The samples were incubated at room temperature for 15 minutes and the RNA  
1031 then was pelleted after ethanol precipitation (incubation at -20°C overnight in 240  $\mu$ L of 100%  
1032 ethanol and 8  $\mu$ L of 3M NaOAc [pH 5.2]). The RNA pellets were washed with 75% cold ethanol,  
1033 dried at room temperature, resuspended in RNase-free water, and incubated at 75°C for 10  
1034 minutes to inactivate the DNase I. One microgram of total RNA was used as a template in  
1035 reverse transcription reactions using 0.2 mM dNTP (TakaRa Bio), 1 U/ $\mu$ L ribonuclease  
1036 inhibitor (porcine liver) (TaKaRa Bio), 0.25 U/ $\mu$ L AMV reverse transcriptase XL (TaKaRa Bio),  
1037 and 0.125  $\mu$ M of an oligo (dT) primer (Invitrogen) according to the protocol provided by the  
1038 manufacturer unless stated otherwise. Two negative controls were included for all instances:  
1039 no reverse transcriptase (reverse transcriptase was excluded during cDNA synthesis) and no



1040 template (cDNA was replaced with RNase-free water). The reverse transcription reaction was  
1041 performed as follows: 30°C for 10 minutes, 42°C for 30 minutes, and 95°C for 5 minutes. Prime  
1042 Script MMLV reverse transcriptase (TaKaRa Bio) and 0.125 µM of the oligo (dT) primer for  
1043 RNA-IP experiments (see below) or a HELZ2 specific primer (HELZ2\_R) for HELZ2 RNA  
1044 quantification were used to reverse transcribe instead. RNA was incubated at 65°C for 5  
1045 minutes before the addition of Prime Script MMLV reverse transcriptase and the reverse  
1046 transcription was performed as follows: 42°C for 60 minutes followed by 70°C for 15 minutes.  
1047 RT-qPCR was performed using Luna Universal qPCR Master Mix (New England Biolabs).  
1048 Amplification was performed using StepOnePlus Real-Time PCR System (Applied  
1049 Biosystems) using the following parameters: 15 seconds at 95°C; followed by 40 cycles of  
1050 denaturation (95°C for 15 seconds) and amplification (60°C for 60 seconds). Technical  
1051 duplicates were made for each sample. Quantification of cDNA for each reaction was  
1052 determined by comparing the cycle threshold (Ct) with a standard curve generated from one  
1053 of the samples using StepOne Software v2.2. All Ct readings fall within the range of the  
1054 standard curve generated.

1055 Primers used for RT-qPCR:

1056 L1 (SV40)\_F: 5'-TCCAGACATGATAAGATACATTGATGAG-3'

1057 L1 (SV40)\_R: 5'-GCAATAGCATCACAAATTTACAAA-3'

1058 L1 (FLAG)\_F: 5'- ATGGATTACAAGGACGACGATG-3'

1059 L1 (FLAG)\_R: 5'-TGTGTGAATTTGATCCTGTCAT-3'

1060 Luciferase\_F: 5'-CGAGGCTACAAACGCTCTCA-3'

1061 Luciferase\_R: 5'-CAGGATGCTCTCCAGTTCCGG-3'

1062 IFN-α\_F: 5'-CTGAATGACTTGGAAGCCTG-3'

1063 IFN-α\_R: 5'-ATTTCTGCTCTGACAACCTC-3'

1064 HELZ2\_F: 5'-GAGAAGGTGGTTCTTCTCGGAG-3'

1065 HELZ2\_R: 5'-CTCATGCATGCGGTACTIONGAG-3'

1066 MOV10\_F: 5'-CGTACCGGAAACAGGTGGAG-3'

1067 MOV10\_R: 5'- TGAACCCACCTTCAAGTCCTTG-3'  
1068 mneol (Alu or L1)\_F: 5'- ACCGGACAGGTCGGTCTTG-3'  
1069 mneol (Alu or L1)\_R: 5'- CTGGGCACAACAGACAATCG-3'  
1070 Beta-actin\_F: 5'-CCTTTTTTGTCCCCCAACTTG-3'  
1071 Beta-actin\_R: 5'-TGGCTGCCTCCACCCA-3'  
1072 GAPDH\_F: 5'-GGAGTCCCTGCCCACTCAG-3'  
1073 GAPDH\_R: 5'-GGTCTACATGGCAACTGTGAGG-3'  
1074 Oligo (dT): 5'-TTTTTTTTTTTTTTTTTTTTTTVN-3'

1075

## 1076 **RNA-IP**

1077 RNA immunoprecipitation (RNA-IP) experiments were carried out as described previously  
1078 with some modifications<sup>27</sup>. HeLa-JVM cells were plated in 10-cm tissue culture dishes at  
1079  $1.5 \times 10^6$  cells per dish. On the following day (day 0), the cells were transfected with 5  $\mu$ g of  
1080 plasmid DNA (pJM101/L1.3, pJM101/L1.3FLAG or pALAF008\_M8) using 15  $\mu$ L of PEI-MAX-  
1081 40K in 500  $\mu$ L of Opti-MEM. Approximately 24 hours post-transfection (day 1), the medium  
1082 was replaced with fresh DMEM. On the following day (day 2), the medium was replaced daily  
1083 with fresh DMEM containing 100  $\mu$ g/mL hygromycin B and the cells were collected at day 5  
1084 post-transfection. The whole cell extracts were prepared by incubation in the Lysis150 buffer  
1085 containing 0.2 mM PMSF and 1x cOmplete EDTA-free protease inhibitor cocktail for one hour  
1086 at 4°C. The lysate was separated from the insoluble fraction by centrifugation at 12, 000 x g  
1087 for five minutes and transferred to a new tube. Ten microliters of the lysate were saved as the  
1088 input fraction. Prior to immunoprecipitation, the anti-FLAG antibody-conjugated beads were  
1089 prepared as described in “immunoprecipitation and western blotting” section of the Methods.  
1090 The cleared lysate (input) was incubated with the anti-FLAG antibody-conjugated beads for 5  
1091 hours at 4°C. The beads were then washed four times with 150  $\mu$ L of Lysis150 buffer without  
1092 protease inhibitors. The RNA extraction was performed as described in “RNA extraction and  
1093 RT-qPCR” in the Methods section with a slight modification: 200  $\mu$ g/mL glycogen was added  
1094 to the immunoprecipitated RNA fraction before ethanol precipitation. All of the RNA samples

1095 were resuspended in 30  $\mu$ L of RNase-free water. Five microliters (one sixth) of the extracted  
1096 RNA from the input and IP fractions were used to synthesize cDNA using PrimeScript MMLV  
1097 reverse transcriptase as described in the previous section. The ORF1p-associated RNA  
1098 values were calculated by dividing the cDNA amount in the IP fraction by that in the input.

1099

### 1100 **Statistical analysis**

1101 One-way ANOVA followed by Bonferroni-Holm post hoc tests were performed for all statistical  
1102 analyses unless stated otherwise. All analyses were performed using online website statistical  
1103 calculator ASTATSA (<https://www.astatsa.com/>) or GraphPad Prism version 9.0.0 for  
1104 Windows (GraphPad Software, San Diego, California USA; [www.graphpad.com](http://www.graphpad.com)). The  
1105 numbers of biological replicates are indicated in the figure legends. Data are shown as the  
1106 mean  $\pm$  standard errors of the means (SEM). The *p*-value of each pair was indicated in the  
1107 figure legends. ns: not significant; \* *p*<0.05; \*\* *p*<0.01; \*\*\* *p*<0.001).

1108

### 1109 **Data availability**

1110 IP-MS data are available in the source data file.

1111

1112 **References**

- 1113 1. Lander, E. S. *et al.* Initial sequencing and analysis of the human genome. *Nature* **409**,  
1114 860–921 (2001).
- 1115 2. Grimaldi, G., Skowronski, J. & Singer, M. F. Defining the beginning and end of KpnI  
1116 family segments. *EMBO J.* **3**, 1753–1759 (1984).
- 1117 3. Ostertag, E. M. & Kazazian, H. H. Twin Priming: A Proposed Mechanism for the  
1118 Creation of Inversions in L1 Retrotransposition. *Genome Res.* **11**, 2059–2065 (2001).
- 1119 4. Richardson, S. R. *et al.* The Influence of LINE-1 and SINE Retrotransposons on  
1120 Mammalian Genomes. *Microbiol. Spectr.* **3**, (2015).
- 1121 5. Sassaman, D. M. *et al.* Many human L1 elements are capable of retrotransposition.  
1122 *Nat. Genet.* **16**, 37–43 (1997).
- 1123 6. Brouha, B. *et al.* Hot L1s account for the bulk of retrotransposition in the human  
1124 population. *Proc. Natl. Acad. Sci. USA* **100**, 5280–5285 (2003).
- 1125 7. Beck, C. R. *et al.* LINE-1 Retrotransposition Activity in Human Genomes. *Cell* **141**,  
1126 1159–1170 (2010).
- 1127 8. Chuang, N. T. *et al.* Mutagenesis of human genomes by endogenous mobile elements  
1128 on a population scale. *Genome Res.* **31**, 2225–2235 (2021).
- 1129 9. Scott, A. F. *et al.* Origin of the human L1 elements: Proposed progenitor genes  
1130 deduced from a consensus DNA sequence. *Genomics* **1**, 113–125 (1987).
- 1131 10. Dombroski, B. A., Mathias, S. L., Nanthakumar, E., Scott, A. F. & Kazazian, H. H.  
1132 Isolation of an Active Human Transposable Element. *Science* **254**, 1805–1808 (1991).
- 1133 11. Martin, S. L. & Bushman, F. D. Nucleic Acid Chaperone Activity of the ORF1 Protein  
1134 from the Mouse LINE-1 Retrotransposon. *Mol. Cell. Biol.* **21**, 467–475 (2001).
- 1135 12. Khazina, E. *et al.* Trimeric structure and flexibility of the L1ORF1 protein in human L1  
1136 retrotransposition. *Nat. Struct. Mol. Biol.* **18**, 1006–1014 (2011).
- 1137 13. Hohjoh, H. & Singer, M. F. Cytoplasmic ribonucleoprotein complexes containing human  
1138 LINE-1 protein and RNA. *EMBO J.* **15**, 630–639 (1996).
- 1139 14. Mathias, S. L., Scott, A. F., Kazazian, H. H., Boeke, J. D. & Gabriel, A. Reverse

- 1140 transcriptase encoded by a human transposable element. *Science* **254**, 1808–1810  
1141 (1991).
- 1142 15. Martín, F., Marañón, C., Olivares, M., Alonso, C. & López, M. C. Characterization of a  
1143 Non-long Terminal Repeat Retrotransposon cDNA (L1Tc) from *Trypanosoma cruzi*:  
1144 Homology of the First ORF with the Ape Family of DNA Repair Enzymes. *J. Mol. Biol.*  
1145 **247**, 49–59 (1995).
- 1146 16. Feng, Q., Moran, J. V., Kazazian, H. H. & Boeke, J. D. Human L1 Retrotransposon  
1147 Encodes a Conserved Endonuclease Required for Retrotransposition. *Cell* **87**, 905–  
1148 916 (1996).
- 1149 17. Moran, J. V. *et al.* High Frequency Retrotransposition in Cultured Mammalian Cells.  
1150 *Cell* **87**, 917–927 (1996).
- 1151 18. Luan, D. D., Korman, M. H., Jakubczak, J. L. & Eickbush, T. H. Reverse transcription of  
1152 R2Bm RNA is primed by a nick at the chromosomal target site: A mechanism for non-  
1153 LTR retrotransposition. *Cell* **72**, 595–605 (1993).
- 1154 19. Cost, G. J., Feng, Q., Jacquier, A. & Boeke, J. D. Human L1 element target-primed  
1155 reverse transcription in vitro. *EMBO J.* **21**, 5899–5910 (2002).
- 1156 20. Flasch, D. A. *et al.* Genome-wide de novo L1 Retrotransposition Connects  
1157 Endonuclease Activity with Replication. *Cell* **177**, 837-851.e28 (2019).
- 1158 21. Swergold, G. D. Identification, characterization, and cell specificity of a human LINE-1  
1159 promoter. *Mol. Cell. Biol.* **10**, 6718–6729 (1990).
- 1160 22. Athanikar, J. N., Badge, R. M. & Moran, J. V. A YY1-binding site is required for  
1161 accurate human LINE-1 transcription initiation. *Nucleic Acids Res.* **32**, 3846–3855  
1162 (2004).
- 1163 23. Olovnikov, I. A. *et al.* Key role of the internal 5'-UTR segment in the transcription  
1164 activity of the human L1 retrotransposon. *Mol. Biol.* **41**, 453–458 (2007).
- 1165 24. Esnault, C., Maestre, J. & Heidmann, T. Human LINE retrotransposons generate  
1166 processed pseudogenes. *Nat. Genet.* **24**, 363–367 (2000).
- 1167 25. Wei, W. *et al.* Human L1 Retrotransposition: cis Preference versus trans

- 1168           Complementation. *Mol. Cell. Biol.* **21**, 1429–1439 (2001).
- 1169   26. Kulpa, D. A. & Moran, J. V. Ribonucleoprotein particle formation is necessary but not  
1170       sufficient for LINE-1 retrotransposition. *Hum. Mol. Genet.* **14**, 3237–3248 (2005).
- 1171   27. Doucet, A. J., Wilusz, J. E., Miyoshi, T., Liu, Y. & Moran, J. V. A 3' Poly(A) Tract Is  
1172       Required for LINE-1 Retrotransposition. *Mol. Cell* **60**, 728–741 (2015).
- 1173   28. Kubo, S. *et al.* L1 retrotransposition in nondividing and primary human somatic cells.  
1174       *Proc. Natl. Acad. Sci. USA* **103**, 8036–8041 (2006).
- 1175   29. Mita, P. *et al.* LINE-1 protein localization and functional dynamics during the cell cycle.  
1176       *eLife* **7**, e30058 (2018).
- 1177   30. Cost, G. J. & Boeke, J. D. Targeting of Human Retrotransposon Integration Is Directed  
1178       by the Specificity of the L1 Endonuclease for Regions of Unusual DNA Structure.  
1179       *Biochemistry* **37**, 18081–18093 (1998).
- 1180   31. Morrish, T. A. *et al.* DNA repair mediated by endonuclease-independent LINE-1  
1181       retrotransposition. *Nat. Genet.* **31**, 159–165 (2002).
- 1182   32. Kulpa, D. A. & Moran, J. V. Cis-preferential LINE-1 reverse transcriptase activity in  
1183       ribonucleoprotein particles. *Nat. Struct. Mol. Biol.* **13**, 655–660 (2006).
- 1184   33. Gilbert, N., Lutz-Prigge, S. & Moran, J. V. Genomic Deletions Created upon LINE-1  
1185       Retrotransposition. *Cell* **110**, 315–325 (2002).
- 1186   34. Gilbert, N., Lutz, S., Morrish, T. A. & Moran, J. V. Multiple fates of L1 retrotransposition  
1187       intermediates in cultured human cells. *Mol. Cell. Biol.* **25**, 7780–7795 (2005).
- 1188   35. Piskareva, O. & Schmatchenko, V. DNA polymerization by the reverse transcriptase of  
1189       the human L1 retrotransposon on its own template in vitro. *FEBS Lett.* **580**, 661–668  
1190       (2006).
- 1191   36. Kazazian, H. H. *et al.* Haemophilia A resulting from de novo insertion of L1 sequences  
1192       represents a novel mechanism for mutation in man. *Nature* **332**, 164–166 (1988).
- 1193   37. Beck, C. R., Garcia-Perez, J. L., Badge, R. M. & Moran, J. V. LINE-1 Elements in  
1194       Structural Variation and Disease. *Annu. Rev. Genomics Hum. Genet.* **12**, 187–215  
1195       (2011).

- 1196 38. Hancks, D. C. & Kazazian, H. H. Roles for retrotransposon insertions in human  
1197 disease. *Mob. DNA* **7**, 9 (2016).
- 1198 39. Kazazian, H. H. & Moran, J. V. Mobile DNA in Health and Disease. *N. Engl. J. Med.*  
1199 **377**, 361–370 (2017).
- 1200 40. Mavragani, C. P. *et al.* Expression of Long Interspersed Nuclear Element 1  
1201 Retroelements and Induction of Type I Interferon in Patients With Systemic  
1202 Autoimmune Disease. *Arthritis Rheumatol. Hoboken NJ* **68**, 2686–2696 (2016).
- 1203 41. Li, P. *et al.* Aicardi–Goutières syndrome protein TREX1 suppresses L1 and maintains  
1204 genome integrity through exonuclease-independent ORF1p depletion. *Nucleic Acids*  
1205 *Res.* **45**, 4619–4631 (2017).
- 1206 42. Zhao, K. *et al.* LINE1 contributes to autoimmunity through both RIG-I- and MDA5-  
1207 mediated RNA sensing pathways. *J. Autoimmun.* **90**, 105–115 (2018).
- 1208 43. Cecco, M. D. *et al.* LINE-1 derepression in senescent cells triggers interferon and  
1209 inflammaging. *Nature* **566**, 73–78 (2019).
- 1210 44. Simon, M. *et al.* LINE1 Derepression in Aged Wild-Type and SIRT6-Deficient Mice  
1211 Drives Inflammation. *Cell Metab.* **29**, 871-885.e5 (2019).
- 1212 45. Ardeljan, D. *et al.* Cell fitness screens reveal a conflict between LINE-1  
1213 retrotransposition and DNA replication. *Nat. Struct. Mol. Biol.* **27**, 168–178 (2020).
- 1214 46. Tunbak, H. *et al.* The HUSH complex is a gatekeeper of type I interferon through  
1215 epigenetic regulation of LINE-1s. *Nat. Commun.* **11**, 5387 (2020).
- 1216 47. Anderson, P. & Kedersha, N. Stressful initiations. *J. Cell Sci.* **115**, 3227–3234 (2002).
- 1217 48. Goodier, J. L., Zhang, L., Vetter, M. R. & Kazazian, H. H. LINE-1 ORF1 protein  
1218 localizes in stress granules with other RNA-binding proteins, including components of  
1219 RNA interference RNA-induced silencing complex. *Mol. Cell. Biol.* **27**, 6469–6483  
1220 (2007).
- 1221 49. Doucet, A. J. *et al.* Characterization of LINE-1 Ribonucleoprotein Particles. *PLoS*  
1222 *Genet.* **6**, e1001150 (2010).
- 1223 50. Moldovan, J. B. & Moran, J. V. The Zinc-Finger Antiviral Protein ZAP Inhibits LINE and

- 1224 Alu Retrotransposition. *PLOS Genet.* **11**, e1005121 (2015).
- 1225 51. Kedersha, N., Ivanov, P. & Anderson, P. Stress granules and cell signaling: more than  
1226 just a passing phase? *Trends Biochem. Sci.* **38**, (2013).
- 1227 52. Protter, D. S. W. & Parker, R. Principles and Properties of Stress granules. *Trends Cell*  
1228 *Biol.* **26**, 668–679 (2016).
- 1229 53. Goodier, J. L., Cheung, L. E. & Kazazian, H. H. MOV10 RNA Helicase Is a Potent  
1230 Inhibitor of Retrotransposition in Cells. *PLoS Genet.* **8**, e1002941 (2012).
- 1231 54. Goodier, J. L., Pereira, G. C., Cheung, L. E., Rose, R. J. & Kazazian, H. H. The Broad-  
1232 Spectrum Antiviral Protein ZAP Restricts Human Retrotransposition. *PLoS Genet.* **11**,  
1233 (2015).
- 1234 55. Mi, H. *et al.* Protocol Update for large-scale genome and gene function analysis with  
1235 the PANTHER classification system (v.14.0). *Nat. Protoc.* **14**, 703–721 (2019).
- 1236 56. Subramanian, A. *et al.* Gene set enrichment analysis: A knowledge-based approach for  
1237 interpreting genome-wide expression profiles. *Proc. Natl. Acad. Sci. USA* **102**, 15545–  
1238 15550 (2005).
- 1239 57. Kammerer, R. A. *et al.* A conserved trimerization motif controls the topology of short  
1240 coiled coils. *Proc. Natl. Acad. Sci. USA* **102**, 13891–13896 (2005).
- 1241 58. Wei, W., Morrish, T. A., Alisch, R. S. & Moran, J. V. A Transient Assay Reveals That  
1242 Cultured Human Cells Can Accommodate Multiple LINE-1 Retrotransposition Events.  
1243 *Anal. Biochem.* **284**, 435–438 (2000).
- 1244 59. Kopera, H. C. *et al.* LINE-1 Cultured Cell Retrotransposition Assay. *Methods Mol. Biol.*  
1245 *Clifton NJ* **1400**, 139–156 (2016).
- 1246 60. Tourrière, H. *et al.* The RasGAP-associated endoribonuclease G3BP assembles stress  
1247 granules. *J. Cell Biol.* **160**, 823–831 (2003).
- 1248 61. Dai, L., Taylor, M. S., O'Donnell, K. A. & Boeke, J. D. Poly(A) Binding Protein C1 Is  
1249 Essential for Efficient L1 Retrotransposition and Affects L1 RNP Formation. *Mol. Cell.*  
1250 *Biol.* **32**, 4323–4336 (2012).
- 1251 62. Yu, Q. *et al.* Type I Interferon Controls Propagation of Long Interspersed Element-1. *J.*



- 1252 *Biol. Chem.* **290**, 10191–10199 (2015).
- 1253 63. Arjan-Odedra, S., Swanson, C. M., Sherer, N. M., Wolinsky, S. M. & Malim, M. H.  
1254 Endogenous MOV10 inhibits the retrotransposition of endogenous retroelements but  
1255 not the replication of exogenous retroviruses. *Retrovirology* **9**, 53 (2012).
- 1256 64. Li, X. *et al.* The MOV10 Helicase Inhibits LINE-1 Mobility. *J. Biol. Chem.* **288**, 21148–  
1257 21160 (2013).
- 1258 65. Orecchini, E. *et al.* ADAR1 restricts LINE-1 retrotransposition. *Nucleic Acids Res.* **45**,  
1259 155–168 (2017).
- 1260 66. Esnault, C. *et al.* APOBEC3G cytidine deaminase inhibits retrotransposition of  
1261 endogenous retroviruses. *Nature* **433**, 430–433 (2005).
- 1262 67. Bogerd, H. P. *et al.* Cellular inhibitors of long interspersed element 1 and Alu  
1263 retrotransposition. *Proc. Natl. Acad. Sci. USA* **103**, 8780–8785 (2006).
- 1264 68. Muckenfuss, H. *et al.* APOBEC3 Proteins Inhibit Human LINE-1 Retrotransposition. *J.*  
1265 *Biol. Chem.* **281**, 22161–22172 (2006).
- 1266 69. Hulme, A. E., Bogerd, H. P., Cullen, B. R. & Moran, J. V. Selective inhibition of Alu  
1267 retrotransposition by APOBEC3G. *Gene* **390**, 199–205 (2007).
- 1268 70. Lovšin, N. & Peterlin, B. M. APOBEC3 Proteins Inhibit LINE-1 Retrotransposition in the  
1269 Absence of ORF1p Binding. *Ann. N. Y. Acad. Sci.* **1178**, 268–275 (2009).
- 1270 71. Horn, A. V. *et al.* Human LINE-1 restriction by APOBEC3C is deaminase independent  
1271 and mediated by an ORF1p interaction that affects LINE reverse transcriptase activity.  
1272 *Nucleic Acids Res.* **42**, 396–416 (2014).
- 1273 72. Richardson, S. R., Narvaiza, I., Planegger, R. A., Weitzman, M. D. & Moran, J. V.  
1274 APOBEC3A deaminates transiently exposed single-strand DNA during LINE-1  
1275 retrotransposition. *eLife* **3**, e02008 (2014).
- 1276 73. Feng, Y., Goubran, M. H., Follack, T. B. & Chelico, L. Deamination-independent  
1277 restriction of LINE-1 retrotransposition by APOBEC3H. *Sci. Rep.* **7**, 10881 (2017).
- 1278 74. Stetson, D. B., Ko, J. S., Heidmann, T. & Medzhitov, R. Trex1 prevents cell-intrinsic  
1279 initiation of autoimmunity. *Cell* **134**, 587–598 (2008).

- 1280 75. Thomas, C. A. *et al.* Modeling of TREX1-dependent autoimmune disease using human  
1281 stem cells highlights L1 accumulation as a source of neuroinflammation. *Cell Stem Cell*  
1282 **21**, 319-331.e8 (2017).
- 1283 76. Zhao, K. *et al.* Modulation of LINE-1 and Alu/SVA Retrotransposition by Aicardi-  
1284 Goutières Syndrome-Related SAMHD1. *Cell Rep.* **4**, 1108–1115 (2013).
- 1285 77. Hu, S. *et al.* SAMHD1 Inhibits LINE-1 Retrotransposition by Promoting Stress Granule  
1286 Formation. *PLOS Genet.* **11**, e1005367 (2015).
- 1287 78. White, T. E. *et al.* Modulation of LINE-1 retrotransposition by a human SAMHD1  
1288 polymorphism. *Virology*. **6**, 53–60 (2016).
- 1289 79. Benitez-Guijarro, M. *et al.* RNase H2, mutated in Aicardi-Goutières syndrome,  
1290 promotes LINE-1 retrotransposition. *EMBO J.* **37**, e98506 (2018).
- 1291 80. Choi, J., Hwang, S.-Y. & Ahn, K. Interplay between RNASEH2 and MOV10 controls  
1292 LINE-1 retrotransposition. *Nucleic Acids Res.* **46**, 1912–1926 (2018).
- 1293 81. Zhang, A. *et al.* RNase L restricts the mobility of engineered retrotransposons in  
1294 cultured human cells. *Nucleic Acids Res.* **42**, 3803–3820 (2014).
- 1295 82. Rusinova, I. *et al.* INTERFEROME v2.0: an updated database of annotated interferon-  
1296 regulated genes. *Nucleic Acids Res.* **41**, D1040–D1046 (2013).
- 1297 83. Szklarczyk, D. *et al.* STRING v11: protein–protein association networks with increased  
1298 coverage, supporting functional discovery in genome-wide experimental datasets.  
1299 *Nucleic Acids Res.* **47**, D607–D613 (2019).
- 1300 84. Warkocki, Z. *et al.* Uridylation by TUT4/7 Restricts Retrotransposition of Human LINE-  
1301 1s. *Cell* **174**, 1537-1548.e29 (2018).
- 1302 85. Amblar, M., Barbas, A., Fialho, A. M. & Arraiano, C. M. Characterization of the  
1303 Functional Domains of Escherichia coli RNase II. *J. Mol. Biol.* **360**, 921–933 (2006).
- 1304 86. Frazão, C. *et al.* Unravelling the dynamics of RNA degradation by ribonuclease II and  
1305 its RNA-bound complex. *Nature* **443**, 110–114 (2006).
- 1306 87. Barbas, A. *et al.* New Insights into the Mechanism of RNA Degradation by  
1307 Ribonuclease II Identification of the Residue Responsible for Setting the RNase II End

- 1308 Product. *J. Biol. Chem.* **283**, 13070–13076 (2008).
- 1309 88. Walker, J. E., Saraste, M., Runswick, M. J. & Gay, N. J. Distantly related sequences in  
1310 the alpha- and beta-subunits of ATP synthase, myosin, kinases and other ATP-  
1311 requiring enzymes and a common nucleotide binding fold. *EMBO J.* **1**, 945–951 (1982).
- 1312 89. Finn, R. D. *et al.* Pfam: the protein families database. *Nucleic Acids Res.* **42**, D222–  
1313 D230 (2014).
- 1314 90. Miller, J. M. & Enemark, E. J. Fundamental Characteristics of AAA+ Protein Family  
1315 Structure and Function. *Archaea* **2016**, 9294307 (2016).
- 1316 91. Dewannieux, M., Esnault, C. & Heidmann, T. LINE-mediated retrotransposition of  
1317 marked Alu sequences. *Nat. Genet.* **35**, 41–48 (2003).
- 1318 92. Miyoshi, T., Makino, T. & Moran, J. V. Poly(ADP-Ribose) Polymerase 2 Recruits  
1319 Replication Protein A to Sites of LINE-1 Integration to Facilitate Retrotransposition. *Mol.*  
1320 *Cell* **75**, 1286-1298.e12 (2019).
- 1321 93. Chu, L.-Y. *et al.* Structural insights into RNA unwinding and degradation by RNase R.  
1322 *Nucleic Acids Res.* **45**, 12015–12024 (2017).
- 1323 94. Awano, N. *et al.* Escherichia coli RNase R Has Dual Activities, Helicase and RNase. *J.*  
1324 *Bacteriol.* **192**, 1344–1352 (2010).
- 1325 95. Hossain, S. T., Malhotra, A. & Deutscher, M. P. The Helicase Activity of Ribonuclease  
1326 R Is Essential for Efficient Nuclease Activity. *J. Biol. Chem.* **290**, 15697–15706 (2015).
- 1327 96. Naufer, M. N. *et al.* L1 retrotransposition requires rapid ORF1p oligomerization, a novel  
1328 coiled coil-dependent property conserved despite extensive remodeling. *Nucleic Acids*  
1329 *Res.* **44**, 281–293 (2016).
- 1330 97. Bourc’his, D. & Bestor, T. H. Meiotic catastrophe and retrotransposon reactivation in  
1331 male germ cells lacking Dnmt3L. *Nature* **431**, 96–99 (2004).
- 1332 98. Coufal, N. G. *et al.* L1 retrotransposition in human neural progenitor cells. *Nature* **460**,  
1333 1127–1131 (2009).
- 1334 99. Ewing, A. D. *et al.* Nanopore Sequencing Enables Comprehensive Transposable  
1335 Element Epigenomic Profiling. *Mol. Cell* **80**, 915-928.e5 (2020).

- 1336 100. Jacobs, F. M. J. *et al.* An evolutionary arms race between KRAB zinc-finger genes  
1337 ZNF91/93 and SVA/L1 retrotransposons. *Nature* **516**, 242–245 (2014).
- 1338 101. Larson, P. A. *et al.* Spliced integrated retrotransposed element (SpiRE) formation in the  
1339 human genome. *PLoS Biol.* **16**, e2003067 (2018).
- 1340 102. Surapureddi, S. *et al.* Identification of a transcriptionally active peroxisome proliferator-  
1341 activated receptor  $\alpha$ -interacting cofactor complex in rat liver and characterization of  
1342 PRIC285 as a coactivator. *Proc. Natl. Acad. Sci. USA* **99**, 11836–11841 (2002).
- 1343 103. Tomaru, T. *et al.* Isolation and Characterization of a Transcriptional Cofactor and Its  
1344 Novel Isoform that Bind the Deoxyribonucleic Acid-Binding Domain of Peroxisome  
1345 Proliferator-Activated Receptor- $\gamma$ . *Endocrinology* **147**, 377–388 (2006).
- 1346 104. Tchenio, T., Casella, J. F. & Heidmann, T. Members of the SRY family regulate the  
1347 human LINE retrotransposons. *Nucleic Acids Res.* **28**, 411–5 (2000).
- 1348 105. Yang, N., Zhang, L., Zhang, Y. & Kazazian Jr, H. H., Jr. An important role for RUNX3 in  
1349 human L1 transcription and retrotransposition. *Nucleic Acids Res.* **31**, 4929–4940  
1350 (2003).
- 1351 106. Sun, X. *et al.* Transcription factor profiling reveals molecular choreography and key  
1352 regulators of human retrotransposon expression. *Proc. Natl. Acad. Sci. USA* **115**,  
1353 E5526–E5535 (2018).
- 1354 107. Usdin, K. & Furano, A. V. The structure of the guanine-rich polypurine:polypyrimidine  
1355 sequence at the right end of the rat L1 (LINE) element. *J. Biol. Chem.* **264**, 15681–7  
1356 (1989).
- 1357 108. Crow, M. K. Long interspersed nuclear elements (LINE-1): Potential triggers of  
1358 systemic autoimmune disease. *Autoimmunity* **43**, 7–16 (2010).
- 1359 109. Volkman, H. E. & Stetson, D. B. The enemy within: endogenous retroelements and  
1360 autoimmune disease. *Nat. Immunol.* **15**, 415–422 (2014).
- 1361 110. Wang, T., Wei, J. J., Sabatini, D. M. & Lander, E. S. Genetic Screens in Human Cells  
1362 Using the CRISPR-Cas9 System. *Science* **343**, 80–84 (2014).
- 1363 111. Kopera, H. C., Moldovan, J. B., Morrish, T. A., Garcia-Perez, J. L. & Moran, J. V.

- 1364 Similarities between long interspersed element-1 (LINE-1) reverse transcriptase and  
1365 telomerase. *Proc. Natl. Acad. Sci. USA* **108**, 20345–20350 (2011).
- 1366 112. Kowarz, E., Löscher, D. & Marschalek, R. Optimized Sleeping Beauty transposons  
1367 rapidly generate stable transgenic cell lines. *Biotechnol. J.* **10**, 647–653 (2015).
- 1368 113. Mátés, L. *et al.* Molecular evolution of a novel hyperactive Sleeping Beauty  
1369 transposase enables robust stable gene transfer in vertebrates. *Nat. Genet.* **41**, 753–  
1370 761 (2009).
- 1371 114. Ostertag, E. M., Luning Prak, E. T., DeBerardinis, R. J., Moran, J. V. & Kazazian, H. H.  
1372 Determination of L1 retrotransposition kinetics in cultured cells. *Nucleic Acids Res.* **28**,  
1373 1418–1423 (2000).
- 1374 115. Pettersen, E. F. *et al.* UCSF ChimeraX: Structure visualization for researchers,  
1375 educators, and developers. *Protein Sci.* **30**, 70–82 (2021).
- 1376 116. Schneider, C. A., Rasband, W. S. & Eliceiri, K. W. NIH Image to ImageJ: 25 years of  
1377 image analysis. *Nat. Methods* **9**, 671–675 (2012).
- 1378

1379 **Acknowledgements**

1380 We thank K. H. Burns, D. Ardeljan, T. Heidmann, M. T. Hayashi, D. Trono, and Z. Izsvak for  
1381 valuable reagents, Ishikawa lab members, T. Makino, K. Sugino, S. Matsuo, K. Onishi, K.  
1382 Nishimori, S. Adachi, K. Yamaguchi, M. Miyoshi, and Dr. J. B. Moldovan for helpful discussions.  
1383 A.L-F. was supported by JASSO and MEXT Scholarships. F.I. was supported by JSPS  
1384 KAKENHI (Grant Number JP19H05655). J.V.M. was supported by NIH grant GM060518. T.M.  
1385 was supported by JSPS KAKENHI (Grant Number JP18K06180 and 21K19219), ISHIZUE  
1386 2021 of Kyoto University Research Development Programs, and research grants from the  
1387 Takeda Science Foundation, the Japan Foundation for Applied Enzymology, the Sumitomo  
1388 Foundation for Basic Science Research Projects, and Astellas Foundation for Research on  
1389 Metabolic Disorders.

1390 **Author information**

1391 Affiliations

1392 **Department of Gene Mechanisms, Graduate School of Biostudies, Kyoto University,**  
1393 **Kyoto 606-8501, Japan**

1394 Ahmad Luqman-Fatah, Fuyuki Ishikawa, Tomoichiro Miyoshi

1395 **Proteomics Facility, Graduate School of Biostudies, Kyoto University, Kyoto 606-8501,**  
1396 **Japan**

1397 Yuzo Watanabe

1398 **Radiation Biology Center, Graduate School of Biostudies, Kyoto University, Kyoto 606-**  
1399 **8501, Japan**

1400 Ahmad Luqman-Fatah, Fuyuki Ishikawa, Tomoichiro Miyoshi

1401 **Department of Human Genetics, University of Michigan Medical School, Ann Arbor, MI**  
1402 **48109-5618, USA**

1403 John V. Moran

1404 **Department of Internal Medicine, University of Michigan Medical School, Ann Arbor, MI**  
1405 **48109-5618, USA**

1406 John V. Moran

1407 **Contributions**

1408 A.L-F., J.V.M., and T.M. conceived, designed, analyzed data and prepared the manuscript.

1409 A.L-F. and T.M. performed experiments. Y.W. provided technical support and performed mass

1410 spectrometry. F.I., J.V.M., and T.M. contributed with critical discussion, reading and editing.

1411 All authors contributed to ideas.

1412 **Corresponding author**

1413 Please address correspondence to Tomoichiro Miyoshi ([miyoshi.tomoichiro.5e@kyoto-](mailto:miyoshi.tomoichiro.5e@kyoto-u.ac.jp)

1414 [u.ac.jp](mailto:miyoshi.tomoichiro.5e@kyoto-u.ac.jp)).

1415 **Ethics declaration**

1416 Competing interests

1417 J.V.M. is an inventor on patent US6150160, is a paid consultant for Gilead Sciences, serves

1418 on the scientific advisory board to Tessera Therapeutics Inc. (where he is paid as a consultant

1419 and has equity options), has licensed reagents to Merck Pharmaceutical, and recently served

1420 on the the American Society of Human Genetics Board of Directors. The other authors declare

1421 no competing interests.

1422

1423

1424 **Supplementary information**

1425 Supplementary Figures 1-6

1426 Supplementary Tables 1-3

1427 **Source data**

1428 Source data file

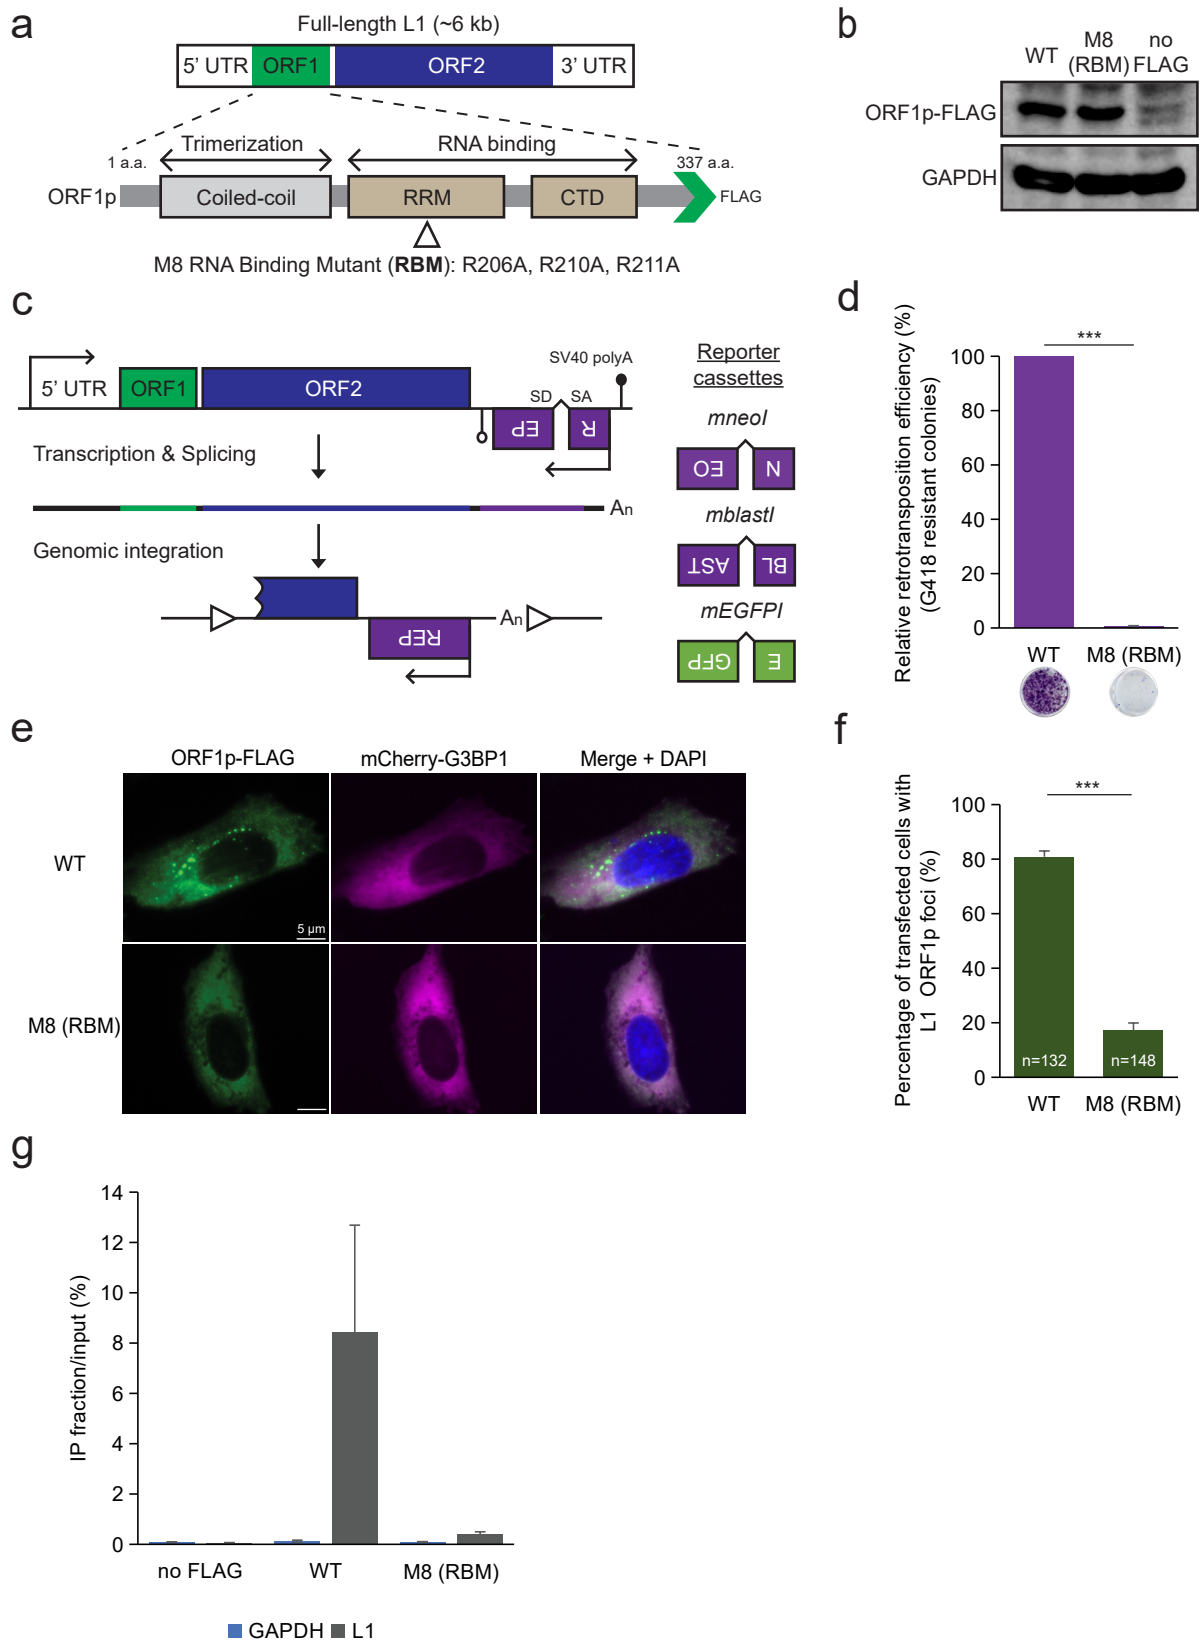

Figure 1. Luqman-Fatah A. *et al.*



1429 **Figure. 1: Identification of an ORF1p RNA-binding mutant critical for L1**  
1430 **retrotransposition and ORF1p cytoplasmic foci formation.**

1431 **(a)** Schematic of a full-length RC-L1 (L1.3: Genbank Accession #L19088). ORF1p functional  
1432 domains are noted below the schematic and include the coiled-coil domain, the RNA  
1433 recognition motif (RRM), and carboxyl-terminal domain (CTD). Green arrowhead, position of  
1434 the in-frame FLAG epitope tag. Open triangle, relative position of a triple mutant  
1435 (R206A/R210A/R211A) in the RRM domain. **(b)** WT ORF1p and the ORF1p-FLAG  
1436 R206A/R210A/R211A mutant are stably expressed in HeLa-JVM cells. Western blot with an  
1437 anti-FLAG antibody. A construct lacking the FLAG epitope tag (pJM101/L1.3 [no FLAG])  
1438 served as a negative control. GAPDH served as a loading control. **(c)** Schematics of the  
1439 retrotransposition indicator cassettes used in this study. A retrotransposition indicator cassette  
1440 (REP) was inserted into the 3'UTR of an L1 in the opposite orientation relative to sense strand  
1441 L1 transcription. The REP gene contains its own promoter (upside down arrow) and  
1442 polyadenylation signal (open lollipop). The REP gene is interrupted by intron in the same  
1443 orientation relative to sense strand L1 transcription. This arrangement ensures that REP  
1444 expression only will occur if the sense strand L1 transcript is spliced and successfully  
1445 integrated into genomic DNA by retrotransposition (bottom schematic, open triangles, target  
1446 site duplications that typically are generated upon L1 retrotransposition). Three  
1447 retrotransposition indicator cassettes are shown at the right of the figure: *mneol*, which confers  
1448 resistance to G418; *mblastl*, which confers resistance to blasticidin; and *mEGFPi*, which leads  
1449 to enhanced green fluorescent protein (EGFP) expression. **(d)** Results of a representative  
1450 *mneol*-based retrotransposition assay. HeLa-JVM cells were co-transfected with phrGFP-C  
1451 (transfection control) and either pJM101/L1.3FLAG (WT) or pALAF008 (M8 [RBM]). X-axis,  
1452 L1 construct names and representative retrotransposition assay results. Y-axis, relative  
1453 retrotransposition efficiency; the number of G418 resistant (retrotransposition-positive) foci  
1454 was normalized to the transfection efficiency (*i.e.*, the percentage of hrGFP-positive cells).  
1455 Pairwise comparison relative to the WT control:  $p = 2.1 \times 10^{-12***}$ . **(e)** The ORF1p-FLAG  
1456 R206A/R210A/R211A mutant (M8 [RBM]) reduces the number of ORF1p cytoplasmic foci.

1457 Representative immunofluorescence microscopy images of U-2 OS cells expressing either  
1458 WT ORF1p-FLAG (pJM101/L1.3-FLAG) or ORF1p-FLAG R206A/R210A/R211A mutant  
1459 (pALAF008 [M8 (RBM)]). The U-2 OS cells also expressed a doxycycline-inducible (Tet-On)  
1460 mCherry-G3BP1 protein. White scale bars, 5  $\mu$ m. **(f)** *Quantification of immunofluorescence*  
1461 *assays in U-2 OS cells.* X-axis, L1 construct names. Y-axis, percentage of transfected cells  
1462 containing ORF1p cytoplasmic foci. The number (n) inside the green bars indicates the  
1463 number of individual cells counted in the assay. Pairwise comparisons relative to the WT  
1464 control:  $p = 7.5 \times 10^{-11}$ \*\*\*. **(g)** *RNA-immunoprecipitation (RNA-IP) reveals an L1 RNA binding*  
1465 *defect in the ORF1p-FLAG R206A/R210A/R211A mutant (M8 [RBM]).* HeLa-JVM cells were  
1466 transfected with either pJM101/L1.3 (no FLAG), WT ORF1p-FLAG (pJM101/L1.3-FLAG), or  
1467 the ORF1p-FLAG R206A/R210A/R211A mutant (pALAF008 [M8 (RBM)]). An anti-FLAG  
1468 antibody was used to immunoprecipitate ORF1p-FLAG; reverse transcription-quantitative  
1469 PCR (RT-qPCR) using a primer set (L1 [SV40]) that amplifies RNAs derived from the  
1470 transfected L1 plasmid was used to quantify L1 RNA. X-axis, constructs name. Y-axis, the  
1471 enrichment of L1 RNA levels between the IP and input fractions. Blue rectangles, relative  
1472 levels of control GAPDH RNA (primer set: GAPDH). Gray rectangles, relative levels of L1 RNA.  
1473 In panels **(d)**, **(f)**, and **(g)**, values represent the mean  $\pm$  the standard error of the mean (SEM)  
1474 of three independent biological replicates. The  $p$ -values were calculated using a one-way  
1475 ANOVA followed by Bonferroni-Holm post-hoc tests; \*\*\*  $p < 0.001$ .

1476

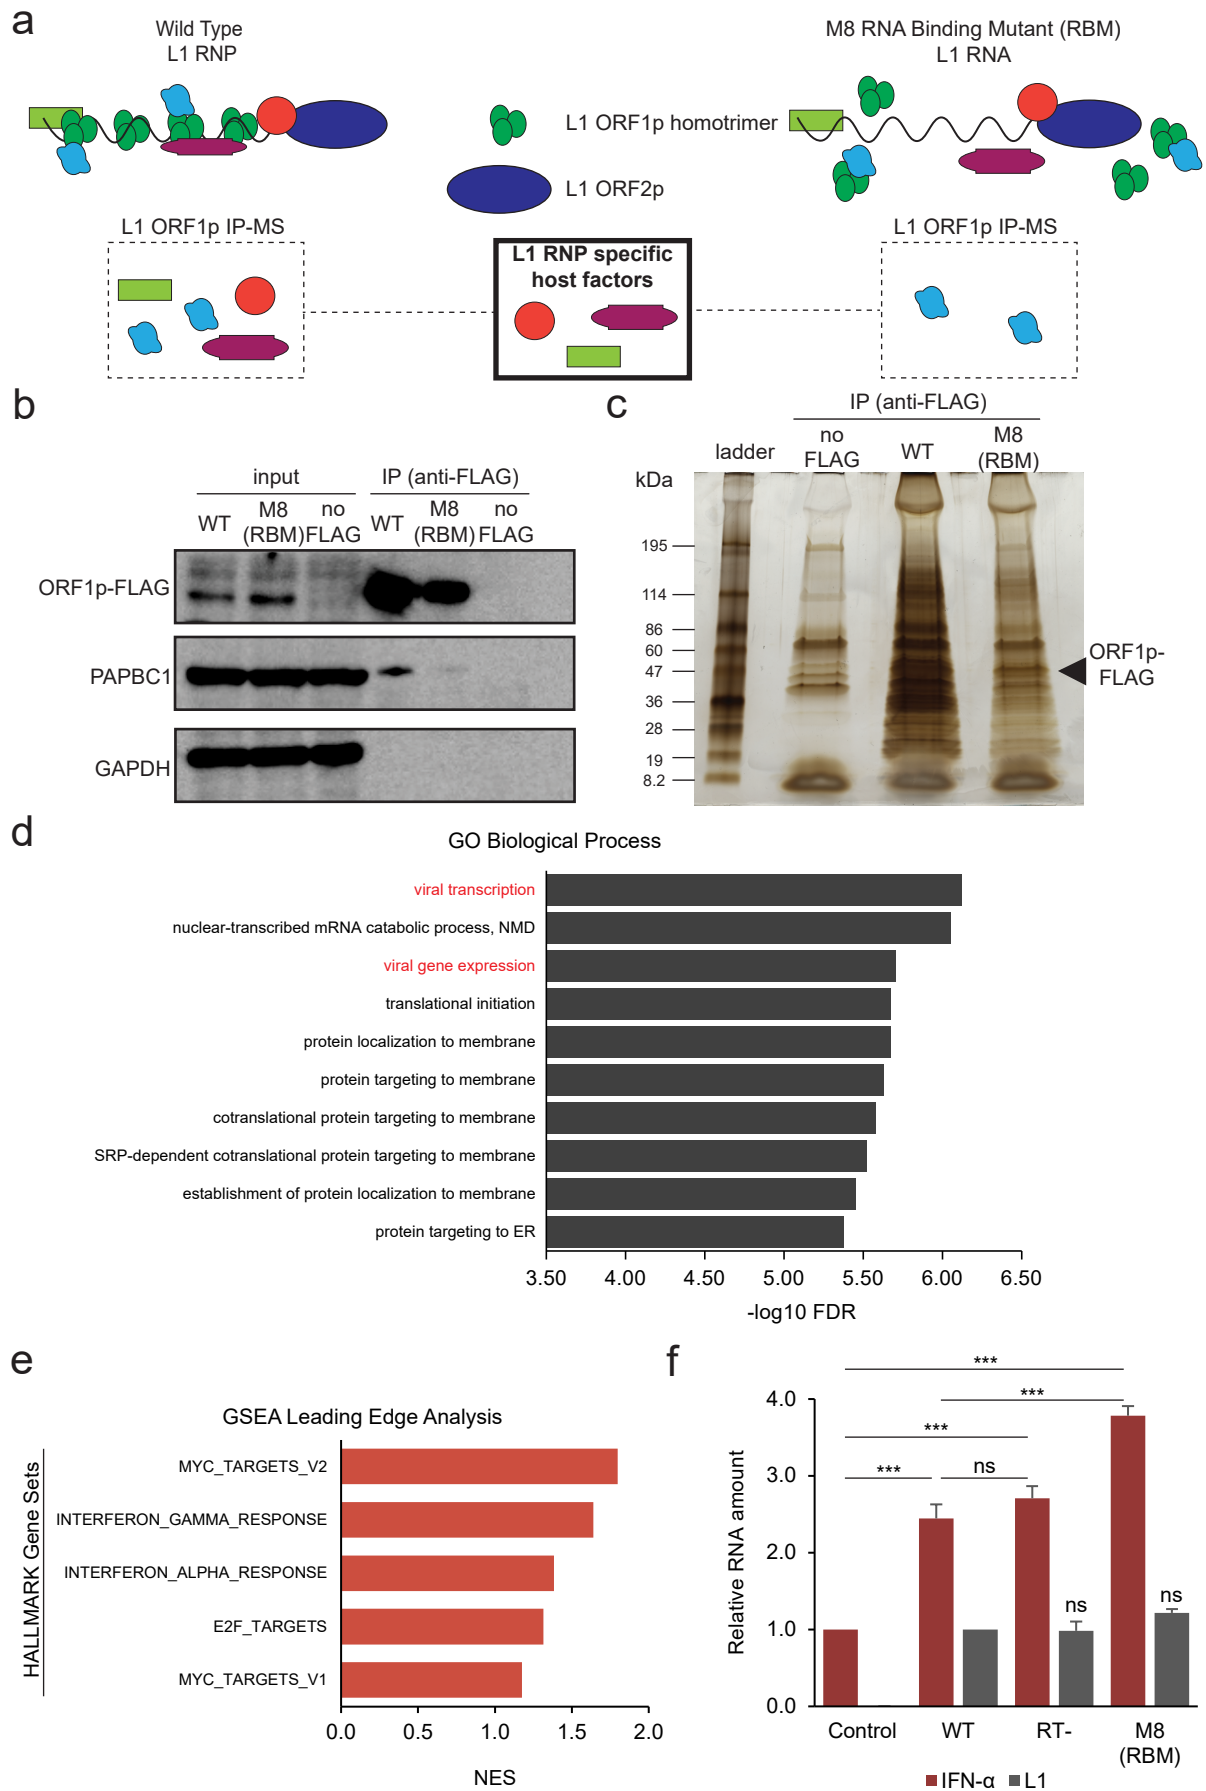

Figure 2. Luqman-Fatah A. *et al.*

1477 **Figure. 2: The proteins encoded by interferon-responsive genes are enriched in WT**  
1478 **ORF1p-FLAG, but not ORF1p-FLAG (M8 [RBM]) mutant complexes.**

1479 **(a) Experimental rationale for identifying host factors enriched in WT ORF1p-FLAG vs.**  
1480 **ORF1p-FLAG (M8 [RBM]) immunoprecipitation reactions.** Hypothetical diagrams of the  
1481 proteins associating with WT and M8 (RBM) mutant RNP particles. Green circles, ORF1p-  
1482 FLAG. Blue Oval, ORF2p. Red circle, purple squared oval, and green rectangle, host factors  
1483 that might associate with ORF1p-FLAG and/or L1 RNPs. **(b) The ORF1p (M8 [RBM]) mutant**  
1484 **does not efficiently interact with Poly(A) Binding Protein Cytoplasmic 1 (PABPC1).** HeLa-JVM  
1485 cells were transfected with either pJM101/L1.3 (no FLAG), pJM101/L1.3-FLAG (WT ORF1p-  
1486 FLAG), or pALAF008 (ORF1p-FLAG [M8 [RBM]] mutant). An anti-FLAG antibody was used to  
1487 immunoprecipitate ORF1p-FLAG. Western blots detected ORF1p (anti-FLAG), PABPC1 (anti-  
1488 PABPC1), and GAPDH (anti-GAPDH) in the input and IP fractions. GAPDH served as a loading  
1489 control for the input fractions and a negative control in the IP experiments. **(c) Separation of**  
1490 **proteins associated with the WT and mutant ORF1p-FLAG proteins.** The WT and M8 (RBM)  
1491 mutant ORF1p-FLAG IP complexes were separated by SDS-PAGE using a 4-15% gradient  
1492 gel and silver staining visualized the proteins. Protein size standards (kDa) are shown at the  
1493 left of the gel. Black arrowhead, the expected molecular weight of ORF1p-FLAG. **(d) Gene**  
1494 **Ontology (GO) analysis identifies cellular proteins enriched in IP WT ORF1p-FLAG vs. the**  
1495 **mutant ORF1p-FLAG complex.** Cellular proteins present in the WT ORF1p and (M8 [RBM])-  
1496 FLAG mutant IP complexes were identified using LC-MS/MS. Proteins having at least five  
1497 peptide matches to the UniProt database (<https://www.uniprot.org/>) were subjected to  
1498 PANTHER statistical enrichment analysis. The top 10 GO terms with the lowest false  
1499 discovery rates (FDRs) are sorted in descending values. X-axis,  $-\log_{10}$  FDR. Y-axis, GO term.  
1500 Red lettering, viral related GO terms. **(e) Leading Edge Analysis identifies interferon-related**  
1501 **gene sets enriched upon WT ORF1p-FLAG immunoprecipitation.** Gene Set Enrichment  
1502 Analysis (GSEA) of peptides immunoprecipitated in WT ORF1p-FLAG vs. (M8 [RBM])-FLAG  
1503 IP complexes was performed using hallmark gene sets in the Molecular Signatures Database  
1504 ([MSigDB: https://www.gsea-msigdb.org/gsea/msigdb/](https://www.gsea-msigdb.org/gsea/msigdb/)), followed by Leading Edge Analysis to

1505 determine gene set enrichment scores. The top five hallmark gene sets with the highest  
1506 normalized enrichment score (NES) are sorted in descending values. X-axis, NES. Y-axis,  
1507 hallmark gene sets. **(f) The expression of engineered L1s modestly up-regulates IFN- $\alpha$**   
1508 **expression.** HEK293T were transfected with either pCEP4 (an empty vector control),  
1509 pJM101/L1.3FLAG (WT), pJM105/L1.3 (RT-), or pALAF008 (M8 [RBM]). RT-qPCR was used  
1510 to quantify IFN- $\alpha$  (primer set: IFN- $\alpha$ ) and L1 expression (primer set: *mneol* [Alu or L1]) ~96  
1511 hours post-transfection. IFN- $\alpha$  and L1 expression levels were normalized using  $\beta$ -actin (*ACTB*)  
1512 as a control (primer set: Beta-actin). X-axis, name of constructs. Control, pCEP4. Y-axis,  
1513 relative RNA expression levels normalized to the pCEP4 empty vector control. Red bars,  
1514 normalized IFN- $\alpha$  expression levels. Gray bars, normalized L1 expression levels. Values from  
1515 three independent biological replicates  $\pm$  SEM are depicted in the graph. The  $p$ -values were  
1516 calculated using a one-way ANOVA followed by Bonferroni-Holm post-hoc tests: pairwise  
1517 comparisons of IFN- $\alpha$  relative to the pCEP4 control,  $p = 0.00028^{***}$  (WT);  $0.00011^{***}$  (RT-);  
1518  $3.14 \times 10^{-6^{***}}$  (M8 [RBM]). Pairwise comparisons of IFN- $\alpha$ : WT vs. RT-,  $p = 0.21^{ns}$ ; WT vs. M8  
1519 (RBM),  $p = 0.00036^{***}$ . Pairwise comparisons of L1 relative to WT,  $p = 0.87^{ns}$  (RT-),  $p = 0.10^{ns}$   
1520 (M8 [RBM]); ns: not significant; \*\*\*  $p < 0.001$ .

1521

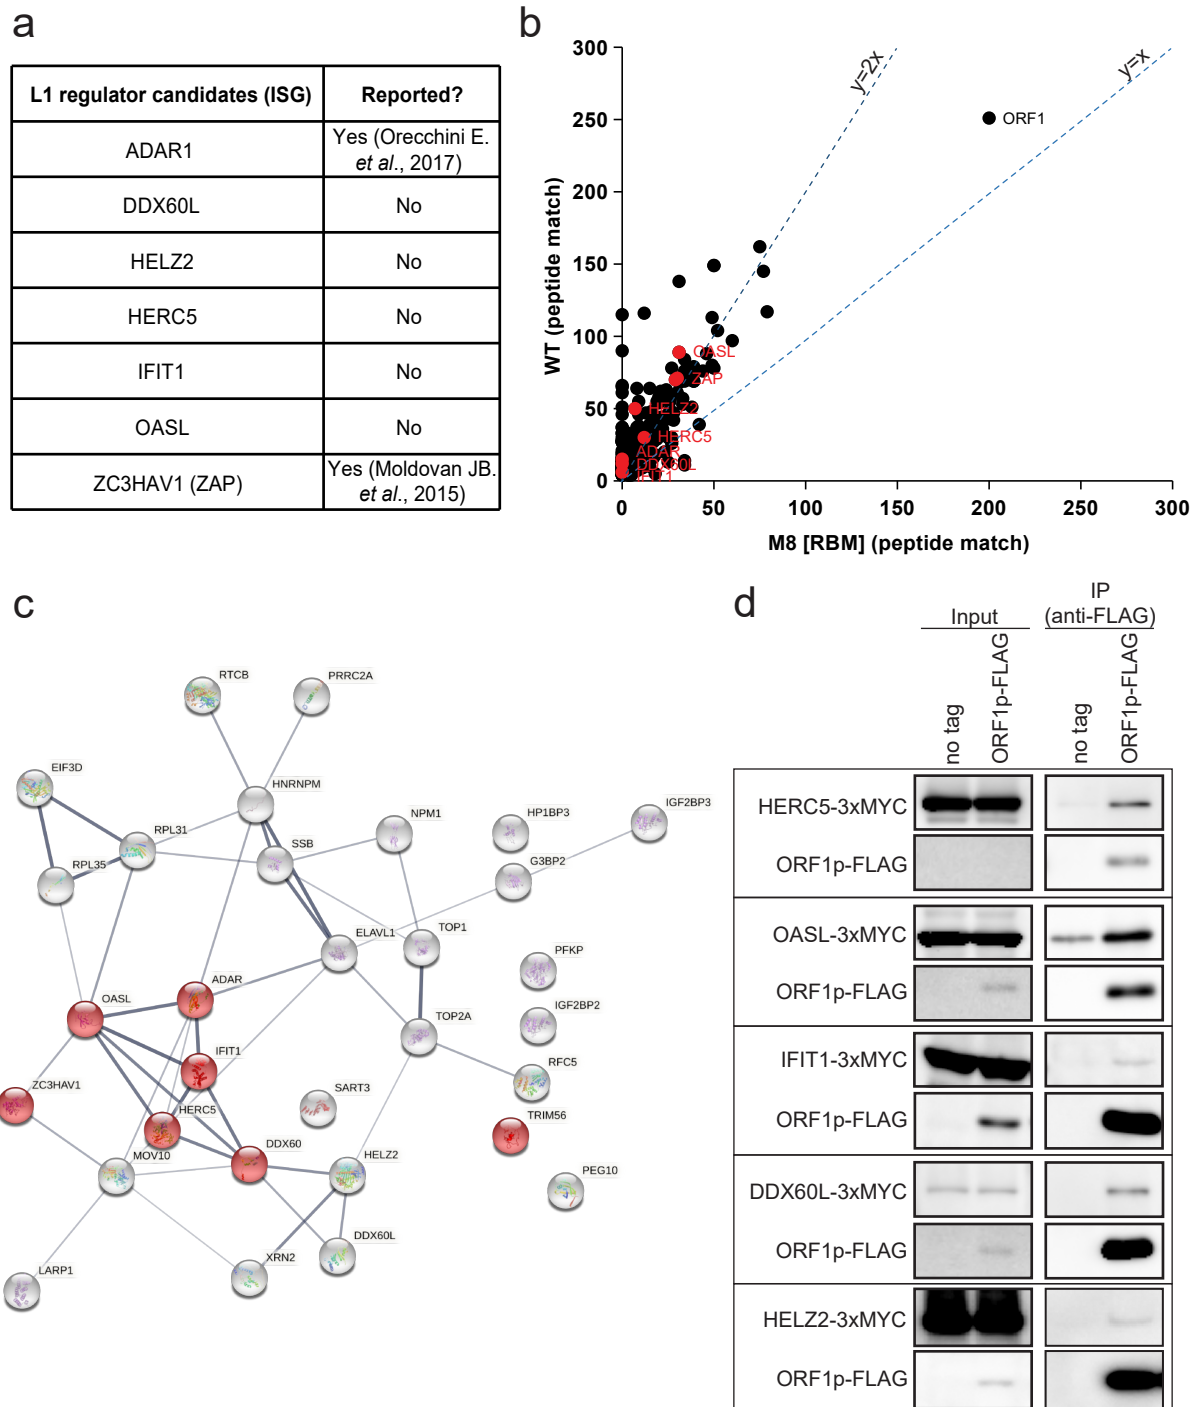

Figure 3. Luqman-Fatah A. *et al.*

1522 **Figure. 3: A network of ISGs that potentially affect WT L1 retrotransposition.**

1523 **(a)** *ISG candidate proteins that may affect L1 biology.* The top 300 proteins identified in the  
1524 WT ORF1p-FLAG complex were analyzed against the interferome database  
1525 (<http://www.interferome.org/interferome/home.jsp>) to identify proteins that exhibit a >10-fold  
1526 increase in expression upon type I interferon induction. ADAR1 and ZAP previously were  
1527 reported to inhibit L1 retrotransposition; DDX60L, HELZ2, HERC5, IFIT1, and OASL represent  
1528 candidate ISG proteins that may play a role in L1 biology. **(b)** *Scatter plot analysis of the top*  
1529 *300 proteins identified in the WT ORF1p-FLAG and ORF1p-FLAG (M8 [RBM]) mutant IP*  
1530 *complexes.* X-axis, the number of matching peptides to proteins in the UniProt database found  
1531 in the ORF1p-FLAG (M8 [RBM]) mutant IP complex. Y-axis, the number of matching peptides  
1532 to proteins in the UniProt database in the WT ORF1p-FLAG IP complex. Red dots, the proteins  
1533 enriched in the WT ORF1p-FLAG IP complexes listed in panel (a). **(c)** *String database analysis*  
1534 *of WT ORF1-FLAG associated proteins.* Proteins identified in the WT ORF1p-FLAG complex  
1535 that exhibited a >5-fold increase in expression upon type I IFN induction were subjected to  
1536 String analysis. Red spheres, proteins annotated as antiviral defense proteins in UniProt.  
1537 Thickness of the inter-connecting lines, the strength of association based on the number of  
1538 independent channels supporting the putative interactions. **(d)** *Independent confirmation that*  
1539 *ISG proteins interact with WT ORF1p-FLAG.* HEK293T cells were co-transfected with either  
1540 pJM101/L1.3 (no tag) or pJM101/L1.3-FLAG (ORF1p-FLAG) and the following individual  
1541 carboxyl-terminal 3xMYC epitope-tagged ISG expression vectors: pALAF015 (HELZ2),  
1542 pALAF016 (IFIT1), pALAF021 (DDX60L), pALAF022 (OASL), or pALAF023 (HERC5). The  
1543 input and anti-FLAG IP reactions were analyzed by western blotting using an anti-FLAG (to  
1544 detect ORF1p-FLAG) or an anti-MYC (to detect ISG proteins) antibody.

1545

1546

1547

1548

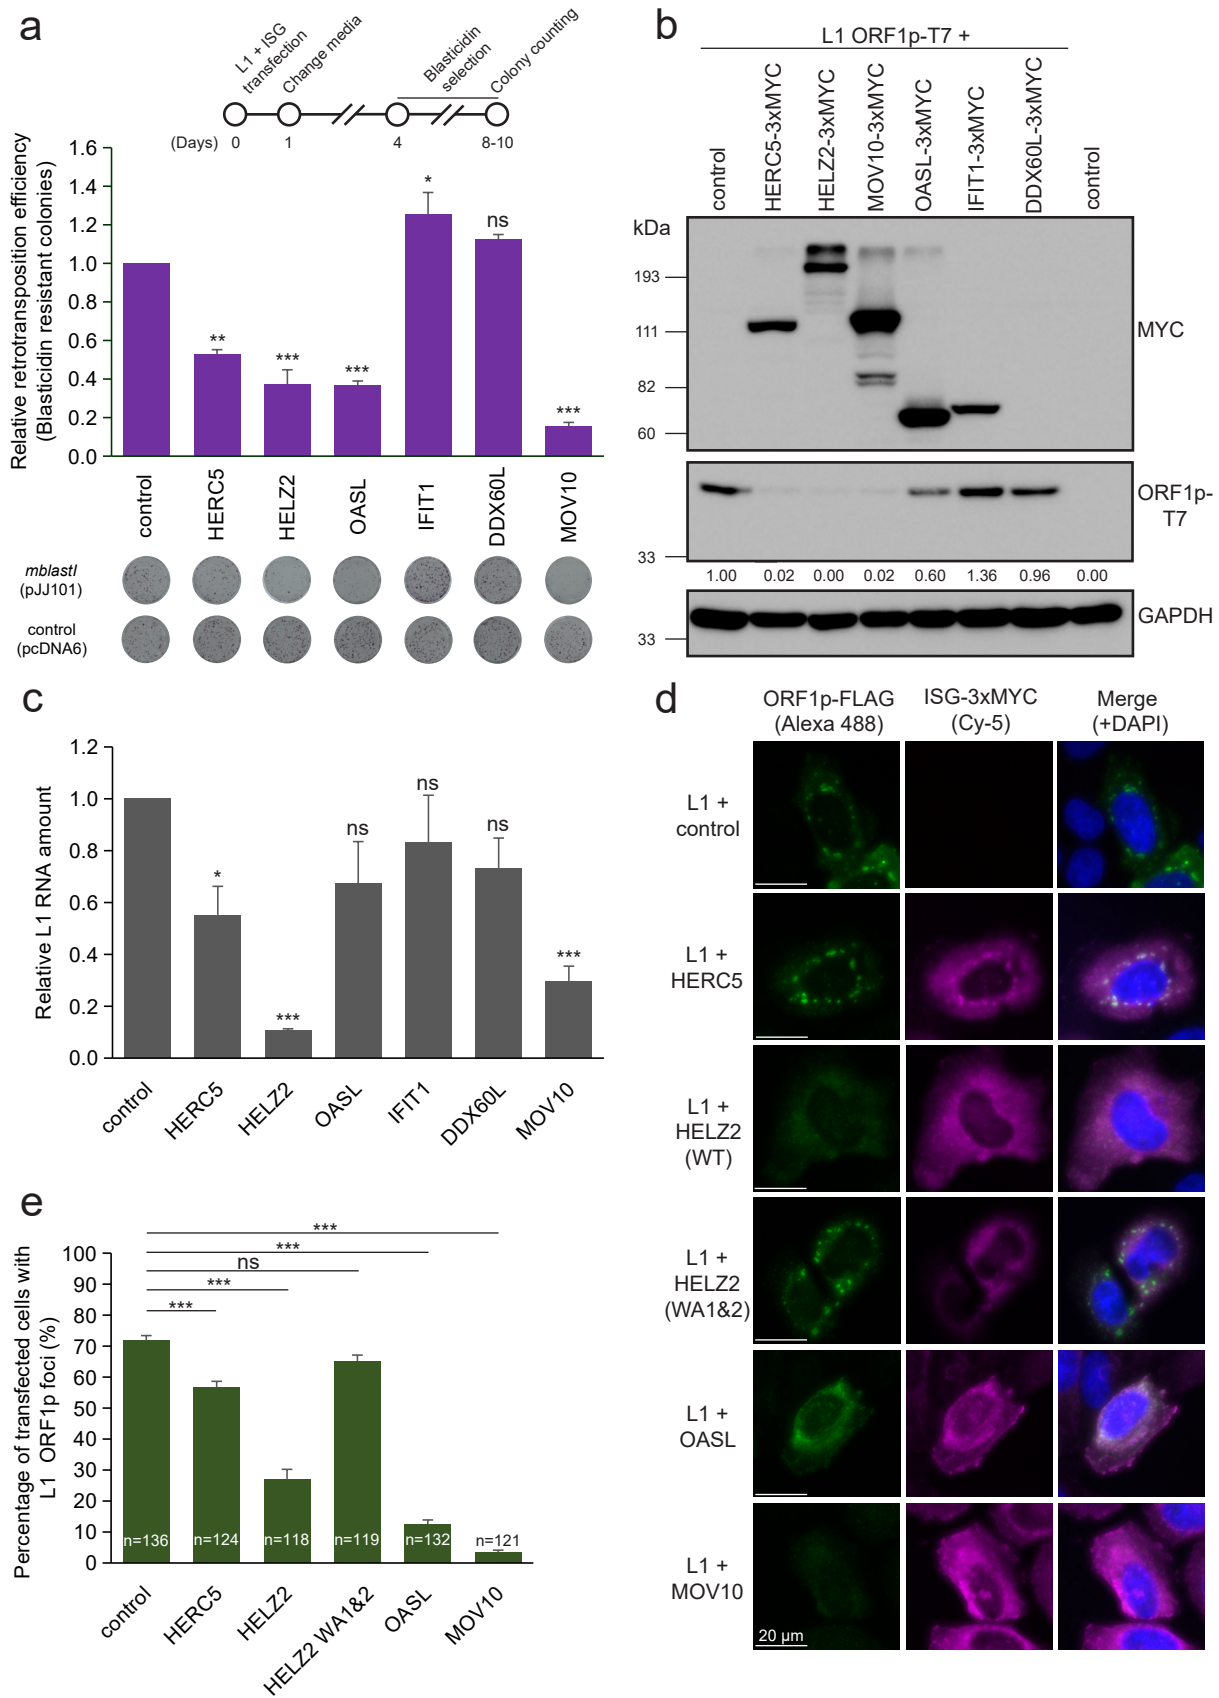

Figure 4. Luqman-Fatah A. *et al.*



1549 **Figure. 4: A subset of ISG proteins affect steady state L1 RNA levels, ORF1p**  
1550 **cytoplasmic foci formation, and/or L1 retrotransposition.**

1551 **(a) Overexpression of HERC5, HELZ2, or OASL inhibit L1 retrotransposition.** HeLa-JVM cells  
1552 were co-transfected with pJJ101/L1.3, which contains the *mblastI* retrotransposition indicator  
1553 cassette, and either pCMV-3Tag-8-Barr or one of the following carboxyl-terminal 3xMYC  
1554 epitope-tagged ISG protein expression plasmids: pALAF015 (HELZ2), pALAF016 (IFIT1),  
1555 pALAF021 (DDX60L), pALAF022 (OASL), pALAF023 (HERC5), or pALAF024 (MOV10)  
1556 according to the timeline shown at the top of the figure. A blasticidin expression vector  
1557 (pcDNA6) was co-transfected into cells with either pCMV-3Tag-8-Barr or an individual ISG  
1558 protein expression plasmid (see plates labeled control [pcDNA6]) to assess cell viability. The  
1559 retrotransposition efficiencies then were normalized to the respective toxicity control. X-axis,  
1560 name of the control (pCMV-3Tag-8-Barr) or ISG protein expression plasmid. Y-axis, relative  
1561 retrotransposition efficiency normalized to the pJJ101/L1.3/pCMV-3Tag-8-Barr co-transfected  
1562 control. Representative results of the retrotransposition (see plates labeled *mblastI* [pJJ101])  
1563 and toxicity (see plates labeled *control* [pcDNA6]) assays are shown below the graph. Pairwise  
1564 comparisons relative to the pJJ101/L1.3 + pCMV-3Tag-8-Barr control:  $p = 8.0 \times 10^{-5**}$   
1565 (HERC5);  $4.4 \times 10^{-6***}$  (HELZ2);  $4.9 \times 10^{-6***}$  (OASL);  $0.011^*$  (IFIT1);  $0.12^{ns}$  (DDX60L); and  
1566  $1.7 \times 10^{-7***}$  (MOV10). MOV10 served as a positive control in the assay. **(b) Expression of the**  
1567 **ISG proteins in HeLa-JVM cells.** HeLa-JVM cells were co-transfected with pTMF3, which  
1568 expresses a version of ORF1p containing a T7 gene 10 carboxyl epitope tag (ORF1p-T7), and  
1569 either a pCMV-3Tag-8-Barr (control) or the individual ISG-expressing plasmids used in panel  
1570 (a). Whole cell extracts were subjected to western blot analysis 48 hours post-transfection.  
1571 ISG proteins were detected using an anti-MYC antibody. ORF1p was detected using an anti-  
1572 T7 antibody. GAPDH served as a loading control. The relative band intensities of ORF1p-T7  
1573 are indicated under the ORF1p-T7 blot; they were calculated using ImageJ software and  
1574 normalized to the respective GAPDH bands. **(c) HELZ2 expression leads to a reduction in the**  
1575 **steady state level of L1 RNA.** HeLa-JVM cells were transfected as in panel (b). L1 RNA levels  
1576 were determined by performing RT-qPCR using a primer set specific to RNAs derived from

1577 the transfected L1 (primer set: L1 [SV40]) and then were normalized to *ACTB* RNA levels  
1578 (primer set: Beta-actin). X-axis, name of the constructs. Y-axis, relative level of L1 RNA  
1579 normalized to the ORF1-T7 + pCMV-3Tag-8-Barr control. Pairwise comparisons relative to the  
1580 control:  $p = 0.032^*$  (HERC5);  $1.7 \times 10^{-5***}$  (HELZ2);  $0.14^{ns}$  (OASL);  $0.29^{ns}$  (IFIT1);  $0.20^{ns}$   
1581 (DDX60L); and  $4.4 \times 10^{-4***}$  (MOV10). **(d) Differential effects of ISG proteins on ORF1p-FLAG**  
1582 **cytoplasmic foci formation.** HeLa-JVM cells were co-transfected with pJM101/L1.3FLAG (WT  
1583 ORF1p-FLAG) and either a pCEP4 empty vector (control) or one of the following carboxyl-  
1584 terminal 3xMYC epitope-tagged ISG protein expression plasmids: pALAF015 (HELZ2);  
1585 pALAF027 (HELZ2 WA1&2); pALAF022 (OASL); pALAF023 (HERC5); or pALAF024  
1586 (MOV10) to visualize WT ORF1p-FLAG cytoplasmic foci and co-localization between WT  
1587 ORF1p-FLAG and the candidate ISG protein. Shown are representative fluorescent  
1588 microscopy images. White scale bars, 20  $\mu$ m. **(e) Quantification of L1 cytoplasmic foci**  
1589 **formation.** X-axis, name of the constructs co-transfected with pJM101/L1.3FLAG (WT ORF1p-  
1590 FLAG); control, pCEP4. Y-axis, percentage of transfected cells with visible ORF1p signal  
1591 exhibiting ORF1p-FLAG cytoplasmic foci. The numbers (n) within the green rectangles  
1592 indicate the number of analyzed cells in each experiment. Pairwise comparisons relative to  
1593 the pJM101/L1.3FLAG (WT ORF1p-FLAG) + pCEP4 control:  $p = 8.6 \times 10^{-4***}$  (HERC5);  $1.2 \times$   
1594  $10^{-7***}$  (HELZ2);  $0.098^{ns}$  (HELZ2 WA1&2);  $1.0 \times 10^{-10***}$  (OASL);  $2.7 \times 10^{-9***}$  (MOV10).  
1595 Values represent the mean  $\pm$  SEM from three (in panels [a] and [e]) or six (in panel [c])  
1596 independent biological replicates. The  $p$ -values were calculated using one-way ANOVA  
1597 followed by Bonferroni-Holm post-hoc tests; ns: not significant; \*  $p < 0.05$ ; \*\*  $p < 0.01$ ; \*\*\*  
1598  $p < 0.001$ .

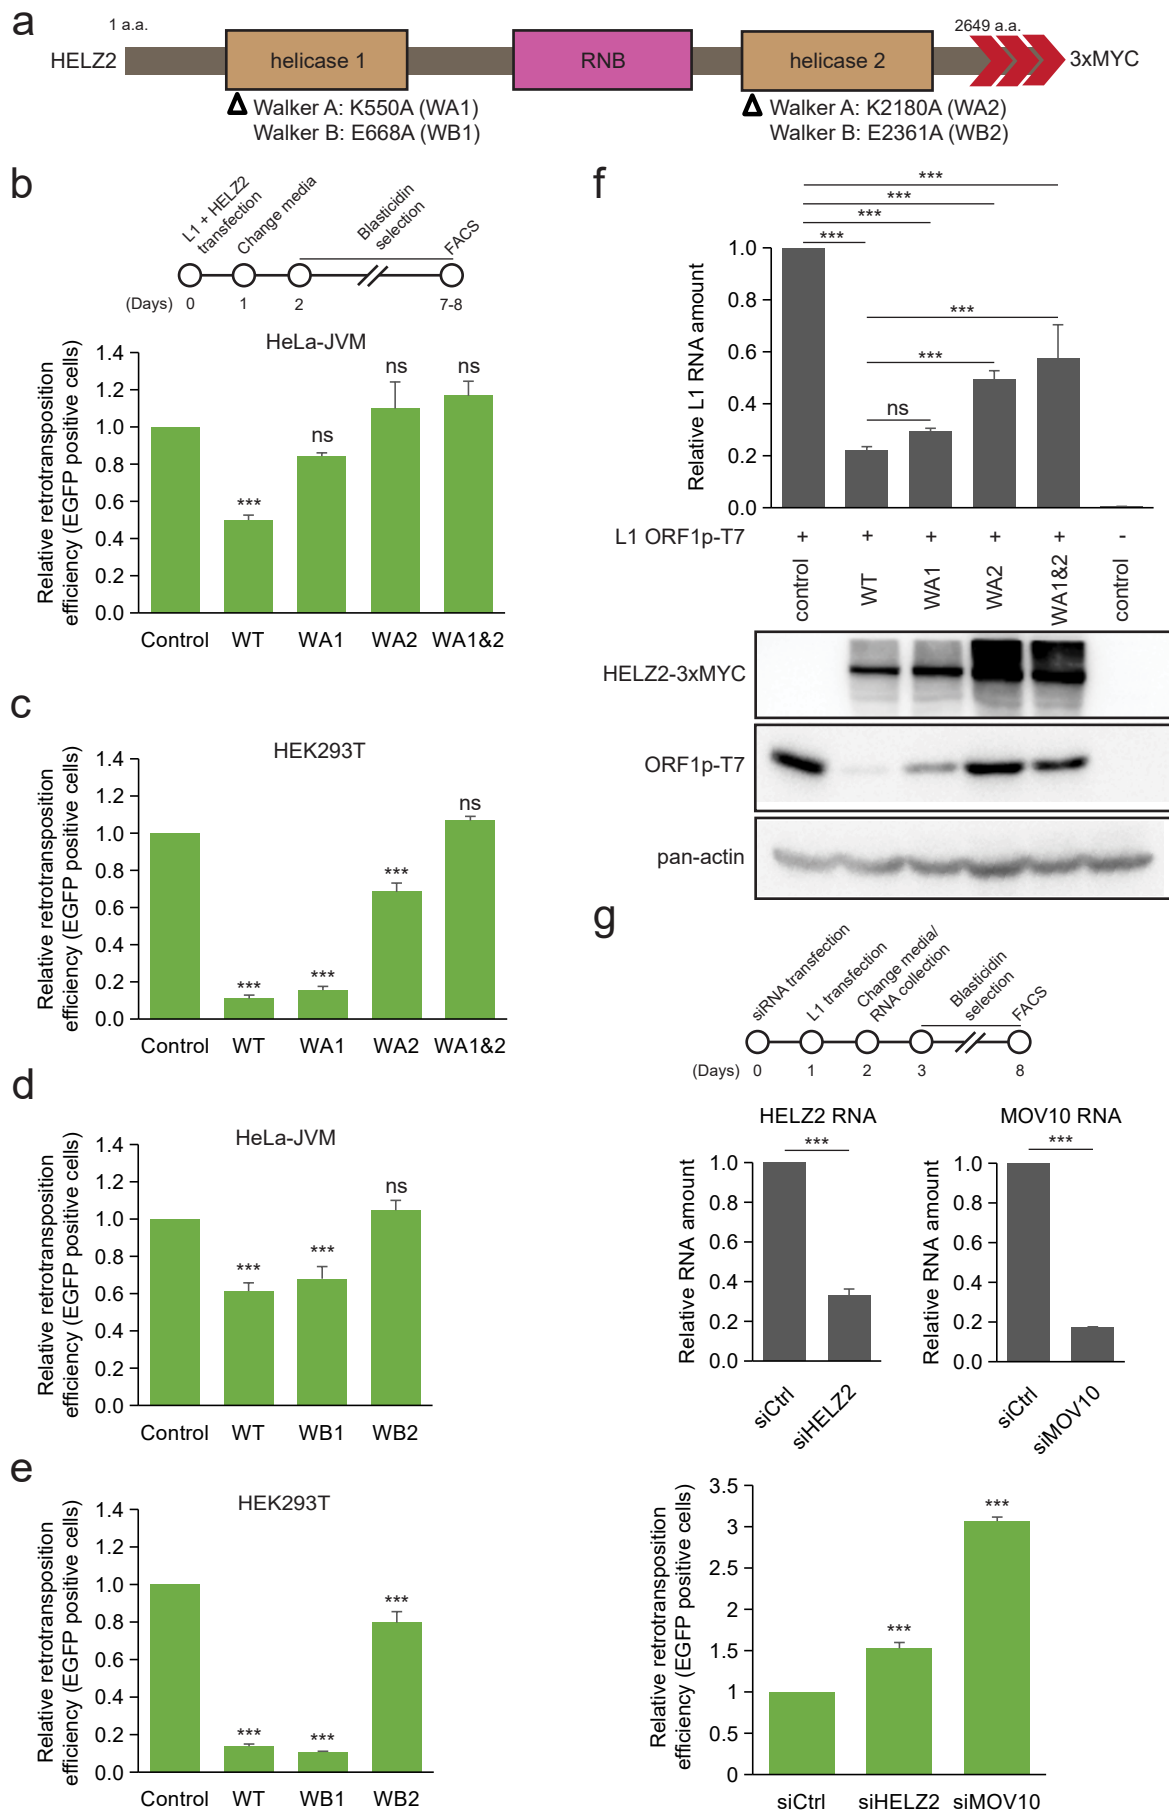

Figure 5. Luqman-Fatah A. *et al.*

1599 **Figure. 5: The HELZ2 helicase activity is critical for L1 inhibition.**

1600 **(a) Schematic of the HELZ2 protein domains.** HELZ2 contains two putative helicase domains  
1601 (helicase 1 and helicase 2), which surround a putative RNB exonuclease domain. Open  
1602 triangles, positions of missense mutation in conserved amino acids within the Walker A (WA)  
1603 and Walker B (WB) boxes in the helicase 1 and helicase 2 domains: K550A (WA1); K2180A  
1604 (WA2); E668A (WB1); and K2361A (WB2). Red arrowheads, relative positions of the 3xMYC  
1605 carboxyl-terminal epitope tag in the HELZ2 expression constructs. **(b) The effect of mutations**  
1606 *in the Walker A box on L1 retrotransposition.* HeLa-JVM cells were co-transfected with cepB-  
1607 gfp-L1.3, which contains a *mEGFP1* retrotransposition indicator cassette, and either pCMV-  
1608 3Tag-8-Barr (control), pALAF015 (WT HELZ2), or one of the following HELZ2 expression  
1609 plasmids that contain a mutation(s) in the Walker A box: pALAF025 (WA1); pALAF026 (WA2);  
1610 or pALAF027 (WA1&2). Cells co-transfected with cepB-gfp-L1.3RT(-) intronless and either  
1611 pCMV-3Tag-8-Barr, pALAF015 (WT HELZ2), or a mutant HELZ2 plasmid served as  
1612 transfection normalization and toxicity controls. Top, timeline of the assay for panels (b), (c),  
1613 (d), and (e). X-axis, name of HELZ2 expression constructs co-transfected into cells with cepB-  
1614 gfp-L1.3; control, pCMV-3Tag-8-Barr. Y-axis, relative retrotransposition efficiency normalized  
1615 to the cepB-gfp-L1.3 + pCMV-3Tag-8-Barr control. Pairwise comparisons relative to the  
1616 control:  $p = 0.00087^{***}$  (WT HELZ2);  $0.26^{ns}$  (WA1);  $0.32^{ns}$  (WA2); and  $0.32^{ns}$  (WA1&2). **(c)**  
1617 *The effect of mutations in the Walker A box on L1 retrotransposition in HEK293T cells.*  
1618 HEK293T cells were co-transfected as in panel (b). Retrotransposition efficiencies were  
1619 calculated as described in panel (b). Pairwise comparisons relative to the cepB-gfp-L1.3  
1620 (*mEGFP1*) + pCMV-3Tag-8-Barr control:  $p = 2.5 \times 10^{-11}^{***}$  (WT HELZ2);  $3.5 \times 10^{-11}^{***}$  (WA1);  
1621  $1.7 \times 10^{-6}^{***}$  (WA2); and  $0.070^{ns}$  (WA1&2). **(d) The effect of mutations in the Walker B box on**  
1622 *L1 retrotransposition in HeLa-JVM cells.* L1 retrotransposition assays were performed as in  
1623 panel (b). Co-transfections were performed using an individual HELZ2 expression plasmid  
1624 containing a mutation in the Walker B box: pALAF028 (WB1) or pALAF029 (WB2).  
1625 Retrotransposition efficiencies were calculated as described in panel (b). Pairwise  
1626 comparisons relative to the L1.3 + pCMV-3Tag-8-Barr control:  $p = 9.5 \times 10^{-5}^{***}$  (WT);  $0.0004^{***}$

1627 (WB1); and  $0.43^{ns}$  (WB2). **(e)** *The effect of mutations in the Walker B box on L1*  
1628 *retrotransposition in HEK293T cells.* HEK293T cells were co-transfected as in panel (b).  
1629 Retrotransposition efficiencies were calculated as described in panel (b). Pairwise  
1630 comparisons relative to the cepB-gfp-L1.3 (mEGFP1) + pCMV-3Tag-8-Barr control:  $p = 9.4 \times$   
1631  $10^{-10***}$  (WT);  $8.4 \times 10^{-10***}$  (WB1); and  $8.7 \times 10^{-4***}$  (WB2). **(f)** *Mutations in the HELZ2*  
1632 *helicase domains reduce the ability to inhibit L1 ORF1p and RNA.* HeLa-JVM cells were  
1633 transfected with pTMF3 (L1 ORF1p-T7), denoted by + symbol, and either pCMV-3Tag-8-Barr  
1634 (control), pALAF015 (WT HELZ2), or an individual HELZ2 expression plasmid containing a  
1635 mutation(s) in the Walker A box: pALAF025 (WA1), pALAF026 (WA2), or pALAF027 (WA1&2).  
1636 Top: L1 RNA levels were determined by RT-qPCR using primers directed against sequences  
1637 in the transfected L1 RNA (primer set: L1 [SV40]) and then were normalized to *ACTB* RNA  
1638 levels (primer set: Beta-actin). Pairwise comparisons relative to the pTMF3 (L1 ORF1p-T7) +  
1639 pCMV-3Tag-8-Barr control:  $p = 9.5 \times 10^{-9***}$  (WT);  $1.9 \times 10^{-8***}$  (WA1);  $7.3 \times 10^{-7***}$  (WA2);  
1640 and  $1.5 \times 10^{-6***}$  (WA1&2). Pairwise comparisons relative to the pTMF3 (L1 ORF1p-T7) + WT  
1641 HELZ2:  $p = 0.56^{ns}$  (WA1);  $5.9 \times 10^{-4***}$  (WA2);  $1.9 \times 10^{-4***}$  (WA1&2). Bottom: western blot  
1642 image displaying ORF1p-T7 bands. HELZ2 expression was detected using an anti-MYC  
1643 antibody. ORF1p was detected using an anti-T7 antibody. Pan-actin served as a loading  
1644 control. **(g)** *Short-interfering RNA (siRNA)-mediated knockdown of endogenous HELZ2*  
1645 *increases L1 retrotransposition.* Top, timeline of the assay conducted in HeLa-JVM cells. Cells  
1646 were transfected with a non-targeting siRNA control (siCtrl), siRNA targeting HELZ2  
1647 (siHELZ2), or siRNA targeting MOV10 (siMOV10). Middle left panel, HELZ2 RNA levels in  
1648 siRNA treated cells. Middle right panel, MOV10 RNA levels in siRNA treated cells. X-axes,  
1649 name of the siRNA. HELZ2 and MOV10 RNA levels were determined using RT-qPCR (primer  
1650 sets: HELZ2 and MOV10, respectively) and then were normalized to *ACTB* RNA levels (primer  
1651 set: Beta-actin). Y-axes, relative HELZ2 or MOV10 RNA levels normalized to the siCtrl. A two-  
1652 tailed, unpaired Student's t-test was used to calculate the  $p$ -values relative to the siRNA  
1653 control:  $p = 3.1 \times 10^{-5***}$  (siHELZ2); and  $5.2 \times 10^{-5***}$  (siMOV10). Bottom panel, HeLa-JVM  
1654 cells were transfected with either siCtrl, siHELZ2, or siMOV10, followed by transfection with

1655 either cepB-gfp-L1.3 or cepB-gfp-L1.3RT(-) intronless, which was used to normalize  
1656 transfection efficiencies. X-axis, name of the siRNA. Y-axis, relative retrotransposition  
1657 efficiency. Pairwise comparisons relative to the non-targeting siRNA control:  $p = 2.9 \times 10^{-4***}$   
1658 (siHELZ2); and  $2.0 \times 10^{-7***}$  (siMOV10). All the reported values represent the mean  $\pm$  SEM  
1659 from three independent biological replicates. The  $p$ -values, except for the RT-qPCR  
1660 experiment shown in panel (g), were calculated using a one-way ANOVA followed by a  
1661 Bonferroni-Holm post-hoc tests. ns: not significant; \*  $p < 0.05$ ; \*\*\*  $p < 0.001$ .

1662

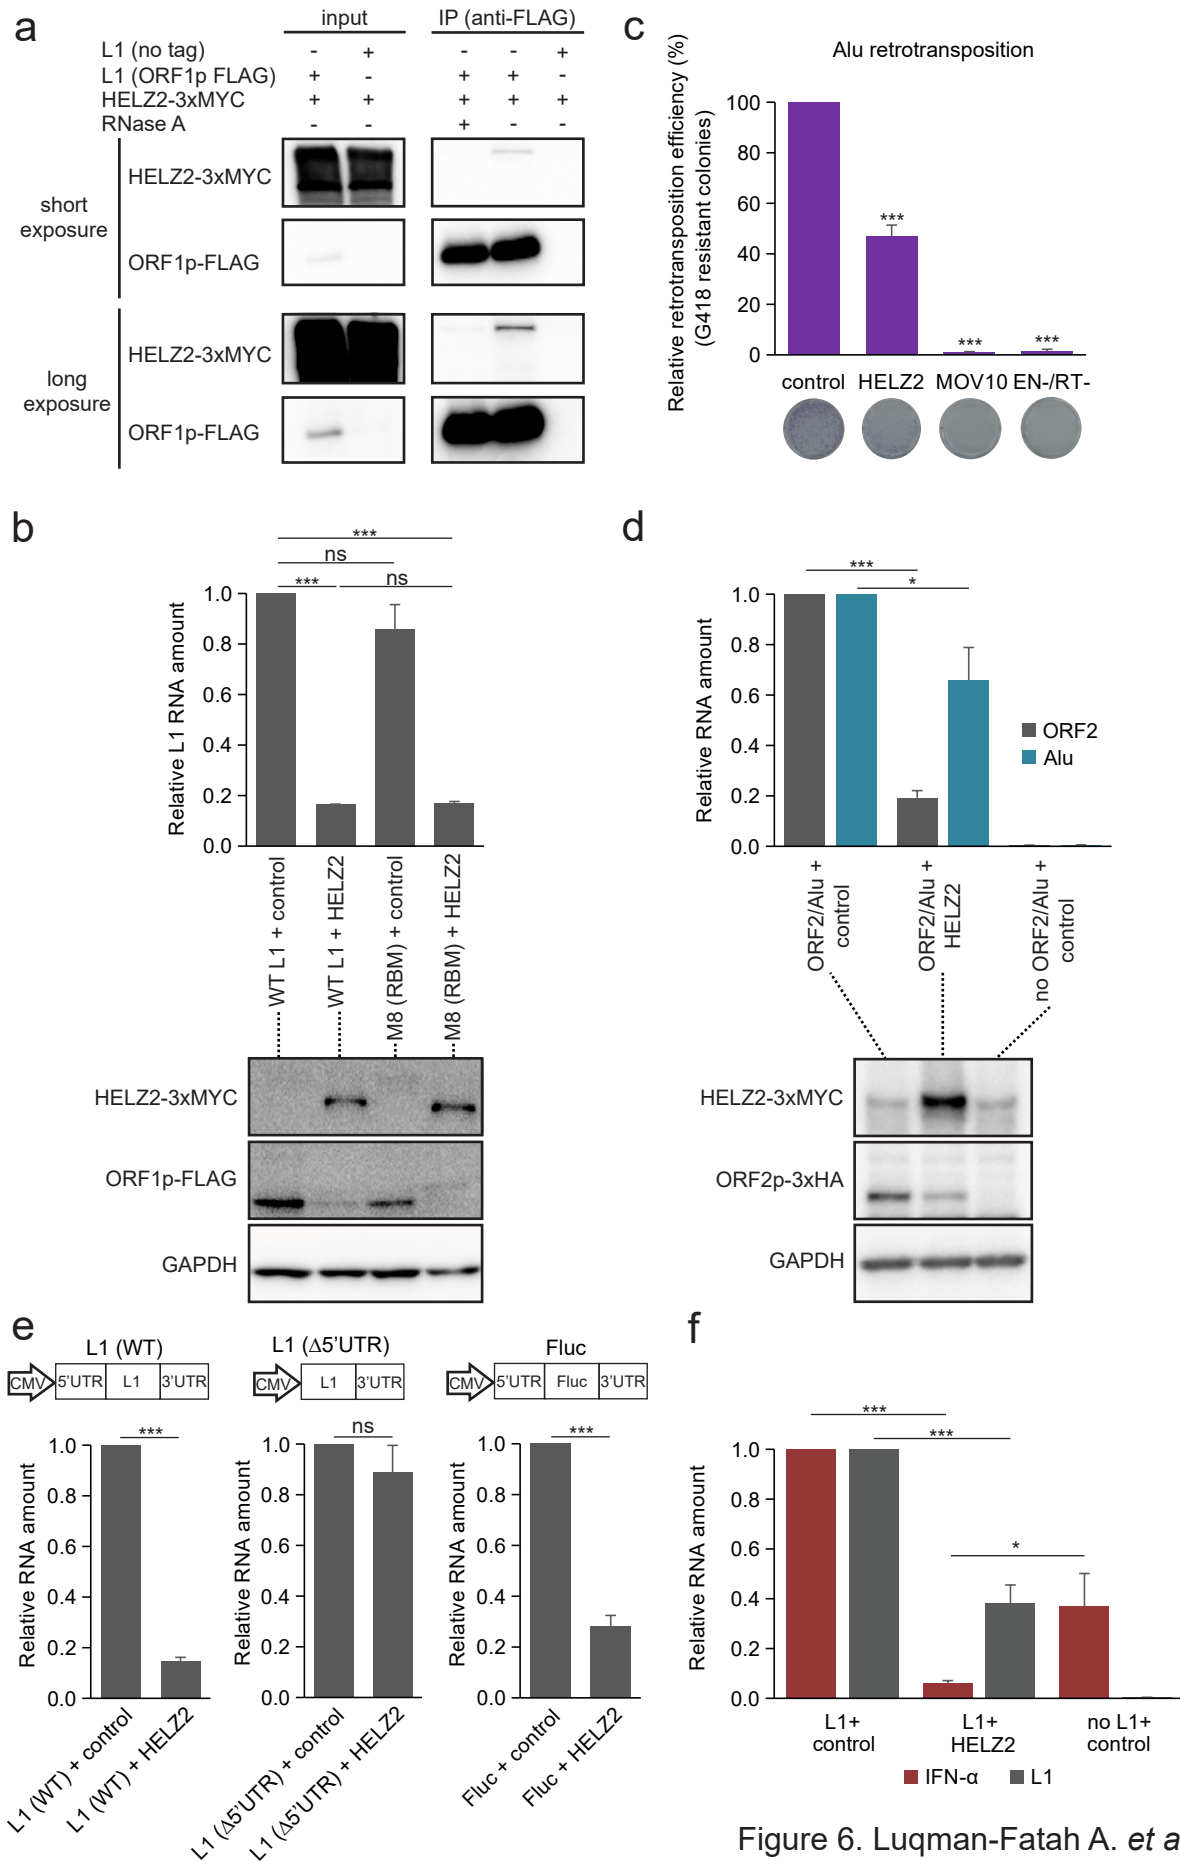

Figure 6. Luqman-Fatah A. *et al.*

1663 **Figure. 6: HELZ2 destabilizes L1 RNA through recognition of the L1 5'UTR sequence,**  
1664 **leading to attenuation of L1-mediated IFN- $\alpha$  induction.**

1665 **(a)** *The association between ORF1p and HELZ2 is RNA-dependent.* HEK293T cells were co-  
1666 transfected with pALAF015 (HELZ2-3xMYC) and either pJM101/L1.3FLAG (WT ORF1p-  
1667 FLAG) or pJM101/L1.3 (no tag). The input and anti-FLAG IP fractions were analyzed by  
1668 western blot using an anti-FLAG antibody to detect ORF1p-FLAG or an anti-MYC antibody to  
1669 detect HELZ2-3xMYC. Shown are short (top blots) and longer (bottom blots)  
1670 chemiluminescence western blot exposures. **(b)** *HELZ2 expression reduces steady state*  
1671 *levels of L1 RNA and ORF1p independent of ORF1p RNA-binding.* HeLa-JVM cells were co-  
1672 transfected with pJM101/L1.3FLAG (WT ORF1p-FLAG) or the pALAF008 ORF1p-FLAG (M8  
1673 [RBM]) mutant expression plasmid and either pCMV-3Tag-8-Barr (control) or pALAF015  
1674 (HELZ2). Top: L1 RNA amounts were determined by RT-qPCR (primer set: L1 [SV40]) and  
1675 then were normalized to *ACTB* RNA levels (primer set: Beta-actin). The L1 RNA values were  
1676 normalized to the WT L1 or ORF1p-FLAG (M8 [RBM]) + pCMV-3Tag-8-Barr control  
1677 transfections. Pairwise comparisons (in parentheses) relative to the (WT L1 + control) are  
1678 shown:  $p = 7.1 \times 10^{-7***}$  (WT L1 + HELZ2);  $0.090^{ns}$  (M8 [RBM] + control);  $6.7 \times 10^{-7***}$  (M8 [RBM]  
1679 + HELZ2). Pairwise comparisons of (WT L1 + HELZ2) vs. (M8 [RBM] + HELZ2),  $p = 0.92^{ns}$ .  
1680 Bottom: ORF1p-FLAG and HELZ2 protein levels were detected by western blot using anti-  
1681 MYC and anti-FLAG antibodies, respectively. GAPDH served as a loading control. **(c)** *HELZ2*  
1682 *expression inhibits Alu retrotransposition.* HeLa-HA cells were co-transfected with  
1683 pTMO2F3\_Alu (which expresses an Alu element marked with *neo*-based retrotransposition  
1684 indicator cassette and monocistronic version of L1 ORF2p [see Methods]),  
1685 pTMO2F3D145AD702A\_Alu (which expresses an Alu element marked with *neo*-based  
1686 retrotransposition indicator cassette and an EN-/RT- mutant version of L1 ORF2 [see  
1687 Methods]), or phrGFP-C (a transfection normalization control) and either pCMV-3Tag-8-Barr  
1688 (control), pALAF015 (WT HELZ2), or pALAF024 (WT MOV10). X-axis, name of constructs. Y-  
1689 axis, the percentage of G418-resistant foci, indicative of Alu retrotransposition, relative to the  
1690 pTMO2F3\_Alu + pCMV-3Tag-8-Barr control (see Methods for more detail). Representative



1691 images of G418-resistant foci are shown below graph. Pairwise comparisons relative to the  
1692 pTMO2F3\_Alu + pCMV-3Tag-8-Barr control:  $p = 7.8 \times 10^{-5***}$  (HELZ2);  $1.8 \times 10^{-7***}$  (MOV10);  
1693 and  $1.6 \times 10^{-7***}$  (EN-/RT-). **(d)** *HELZ2* expression leads to a reduction in monocistronic *ORF2*  
1694 *L1* RNA and *ORF2p* levels. HeLa-HA cells were co-transfected with pTMO2H3\_Alu (*ORF2p*-  
1695 3xHA and Alu) and either pCMV-3Tag-8-Barr (control) or pALAF015 (*HELZ2*). Top: *ORF2*  
1696 (gray bars) and Alu RNA (blue bars) levels were determined using RT-qPCR (primer sets: L1  
1697 [SV40] and mneol [Alu or L1], respectively) and normalized to *ACTB* RNA levels (primer set:  
1698 Beta-actin). X-axis, co-transfected constructs name. Y-axis, relative RNA level normalized to  
1699 the pTMO2H3\_Alu (*ORF2p*-3xHA and Alu) + pCMV-3Tag-8-Barr control. L1 *ORF2* RNA  
1700 pairwise comparison (*ORF2*/Alu + control vs. *ORF2*/Alu + *HELZ2*),  $p = 7.2 \times 10^{-8***}$ . Alu RNA  
1701 pairwise comparison (*ORF2*/Alu + control vs. *ORF2*/Alu + *HELZ2*),  $p = 0.018^*$ . Bottom:  
1702 Western blotting using an anti-HA antibody was used to detect *ORF2p*. GAPDH served as a  
1703 loading control. **(e)** *The L1 5'UTR is required for HELZ2-mediated reduction of L1 RNA levels.*  
1704 HeLa-JVM cells were co-transfected with L1 (WT), L1 ( $\Delta$ 5'UTR), or Fluc (a firefly luciferase  
1705 gene flanked by the L1 5' and 3'UTRs) and either pCMV-3Tag-8-barr (control) or pALAF015  
1706 (*HELZ2*). Schematics of the constructs are above the bar charts. RNA levels were determined  
1707 by RT-qPCR using the following primer sets: L1 (SV40) (for L1 WT and L1[ $\Delta$ 5'UTR]) or  
1708 Luciferase (for Fluc) and then were normalized to *GAPDH* RNA levels (primer set: *GAPDH*).  
1709 X-axis, name of respective constructs co-transfected with pCMV-3Tag-8-Barr (control) or  
1710 pALAF015 (*HELZ2*); Y-axis, the relative amount of L1 or Fluc-based RNA relative to the  
1711 relevant pairwise control (e.g., the L1 expression plasmid + pCMV-3Tag-8-Barr or the Fluc-  
1712 based plasmid + pCMV-3Tag-8-Barr). Two-tailed, unpaired Student's t-tests:  $p = 3.9 \times 10^{-7***}$   
1713 (left plot);  $0.35^{ns}$  (middle plot);  $7.1 \times 10^{-5***}$  (right plot). **(f)** *HELZ2* expression represses L1-  
1714 induced *IFN- $\alpha$*  expression. HEK293T cells were co-transfected with pJM101/L1.3FLAG and a  
1715 pCEP4 empty vector (left: L1 + control); pJM101/L1.3FLAG and pALAF015 (middle: L1 +  
1716 *HELZ2*); or only pCEP4 empty vector (right: no L1 + control). *IFN- $\alpha$*  (red bars) and L1 (gray  
1717 bars) RNA levels were determined by RT-qPCR (using primer sets [*IFN- $\alpha$* ] and L1 [FLAG],  
1718 respectively) and normalized to *ACTB* RNA levels (primer set: Beta-actin). The RNA levels

1719 then were normalized to the L1 + pCEP4 transfection (L1 + control). L1 RNA pairwise  
1720 comparison: (L1 + control vs. L1 + HELZ2),  $p = 9.6 \times 10^{-5***}$ . IFN- $\alpha$  RNA pairwise comparisons:  
1721 (L1 + control vs. L1 + HELZ2),  $p = 4.0 \times 10^{-4***}$ ; (L1 + HELZ2 vs. no L1 + control),  $p = 0.031^*$ .  
1722 With the exception of panel (e), values are reported as the mean  $\pm$  SEM of three independent  
1723 biological replicates. The  $p$ -values were calculated using a one-way ANOVA followed by  
1724 Bonferroni-Holm post-hoc tests. ns: not significant; \*  $p < 0.05$ ; \*\*\*  $p < 0.001$ .  
1725

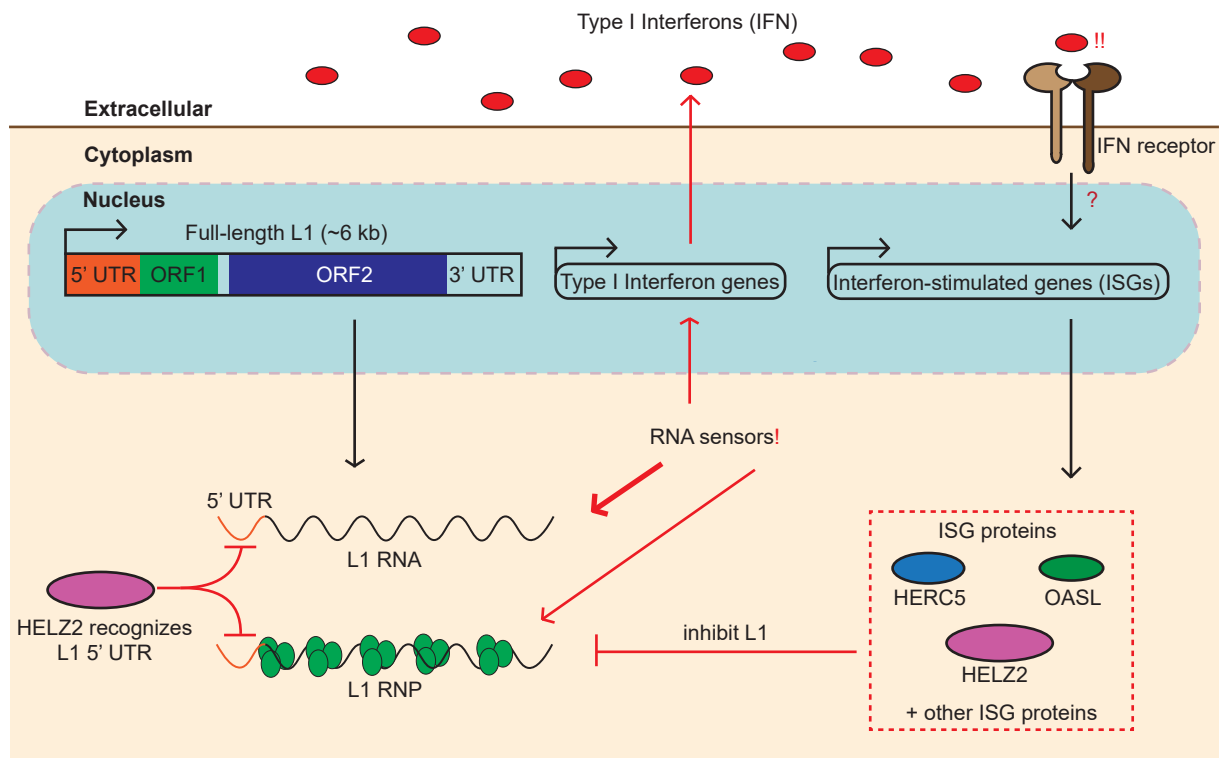

Figure 7. Luqman-Fatah A. *et al.*

1726 **Figure. 7: A working model hypothesizing a negative feedback loop between L1 RNA**  
1727 **levels and ISG proteins.**

1728 L1 RNAs and/or RNPs can be detected by cytoplasmic RNA sensors, which elicit the secretion  
1729 of type I interferons (IFNs); ORF1p RNA-binding might shield L1 RNA from the sensors. IFN-  
1730 binding to the extracellular IFN cell surface receptors then activates a signaling cascade,  
1731 which induces the expression of ISGs, including *HELZ2*, *HERC5*, and *OASL*. These ISG  
1732 proteins appear to inhibit L1 retrotransposition at different steps in the L1 retrotransposition  
1733 cycle. *HELZ2* appears to recognize RNA sequences and/or RNA structures within the L1  
1734 5'UTR, independently of ORF1p RNA binding, leading to the degradation of L1 RNA and  
1735 subsequent blunting of the IFN response.

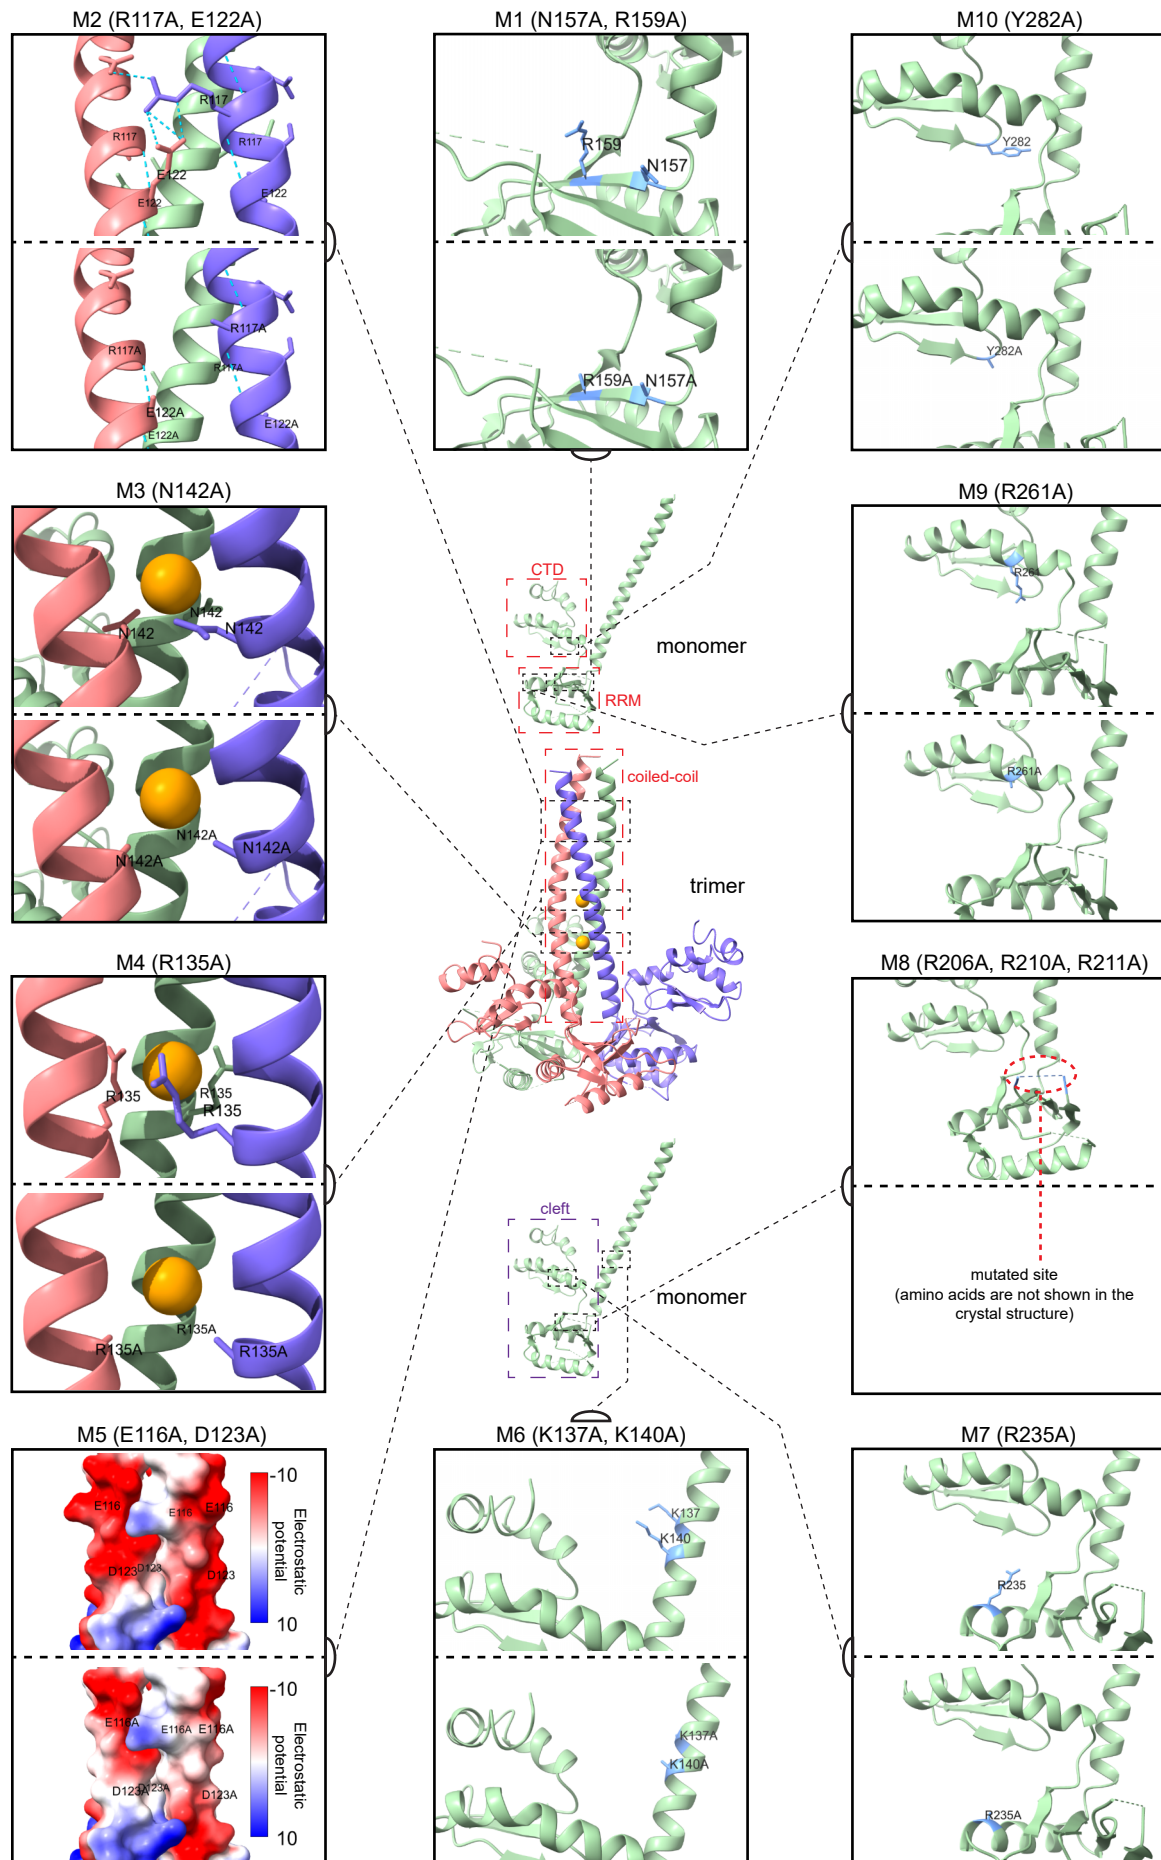

Supplementary Figure 1. Luqman-Fatah A. *et al.*

1736 **Supplementary Figure. 1 (supporting Fig. 1a and Supplementary Figs. 2a and 2b):**  
1737 **Crystal structure of L1 ORF1p mutants.**  
1738 **Center:** *Crystal structure of the ORF1p trimer (middle) and monomer (top and bottom).* Shown  
1739 is the crystal structure assembly of the ORF1p trimer from amino acid residues 107 to 323 in  
1740 the “lifted” conformation (Protein Data Bank ID: 2ykp); each monomer is annotated with distinct  
1741 colors (green, purple, and red colors). Two chloride ion residues (orange spheres) are shown  
1742 in the predicted position inside the coiled-coil domain (red-dotted box, top of the trimer). Each  
1743 monomer forms a flexible cleft (indicated in bottom monomer: purple-dotted box) made up of  
1744 an RNA recognition motif (top monomer: RRM, bottom of the cleft, red-dotted box) and a C-  
1745 terminal domain (top monomer: CTD, top of the cleft, red-dotted box) to bind RNA. Relative  
1746 positions of the mutated amino acids are indicated in black-dotted boxes connected with black-  
1747 dotted lines to the respective enlarged images of the mutated sites. **Periphery:** *Mutated sites*  
1748 *of the ORF1p mutants in this study.* Based on the number from lowest (e.g., M1 and M2) to  
1749 highest (e.g., M10), the ORF1p mutants were arranged in a counterclockwise direction  
1750 beginning from the top (middle), where each of the mutant is enclosed in black boxes with the  
1751 respective annotation noted at the top. Amino acids corresponding to the WT and alanine  
1752 missense mutations are indicated within each box, where the WT (upper) and the mutants  
1753 (lower) are separated by black-dotted lines. M1, M6, M7, M9 and M10: mutated amino acids  
1754 and side chains are indicated in blue. M2: blue-dotted lines indicate hydrogen bonds formed,  
1755 including between R117 and E122 side chains (different monomers) to stabilize the trimer. M3  
1756 and M4: depicted are the predicted side chains thought to stabilize the chloride ions. M5: a  
1757 relative electrostatic potential map of the ORF1p trimers surface, the mutated site was  
1758 suggested to be a potential recruitment site of host factors. Red indicates low positive  
1759 electrostatic potential (high acidity) and blue indicates high positive electrostatic potential (high  
1760 basicity). M8: the mutated site is shown in the red-dotted circle.

**a**

| Number             | M1                                   | M2                                  | M3                                    | M4                                    | M5                                                         | M6                                 | M7                                | M8                                | M9                                                | M10                               |
|--------------------|--------------------------------------|-------------------------------------|---------------------------------------|---------------------------------------|------------------------------------------------------------|------------------------------------|-----------------------------------|-----------------------------------|---------------------------------------------------|-----------------------------------|
| Mutational Sites   | N157A, R159A                         | R117A, E122A                        | N142A                                 | R135A                                 | E116A, D123A                                               | K137A, K140A                       | R235A                             | R206A, R210A, R211A               | R261A                                             | Y282A                             |
| Putative functions | Conserved site, abolished ORF1p foci | RhxxhE motif (trimerization)        | Chloride ion mediator (trimerization) | Chloride ion mediator (trimerization) | Putative protein binding site, does not affect RNA binding | Decrease RNA binding (coiled-coil) | Decrease RNA binding (RRM)        | Loss of RNA binding ability (RRM) | Decrease RNA binding and chaperone activity (CTD) | Decrease chaperone activity (CTD) |
| References         | Goodier, J.L. <i>et al.</i> , 2007   | Kammerer, R.A. <i>et al.</i> , 2005 | Khazina, E. <i>et al.</i> , 2011      | Khazina, E. <i>et al.</i> , 2011      | Khazina, E. <i>et al.</i> , 2011                           | Khazina, E. <i>et al.</i> , 2011   | Doucet, A.J. <i>et al.</i> , 2010 | Khazina, E. <i>et al.</i> , 2011  | Doucet, A.J. <i>et al.</i> , 2010                 | Doucet, A.J. <i>et al.</i> , 2010 |

**b**

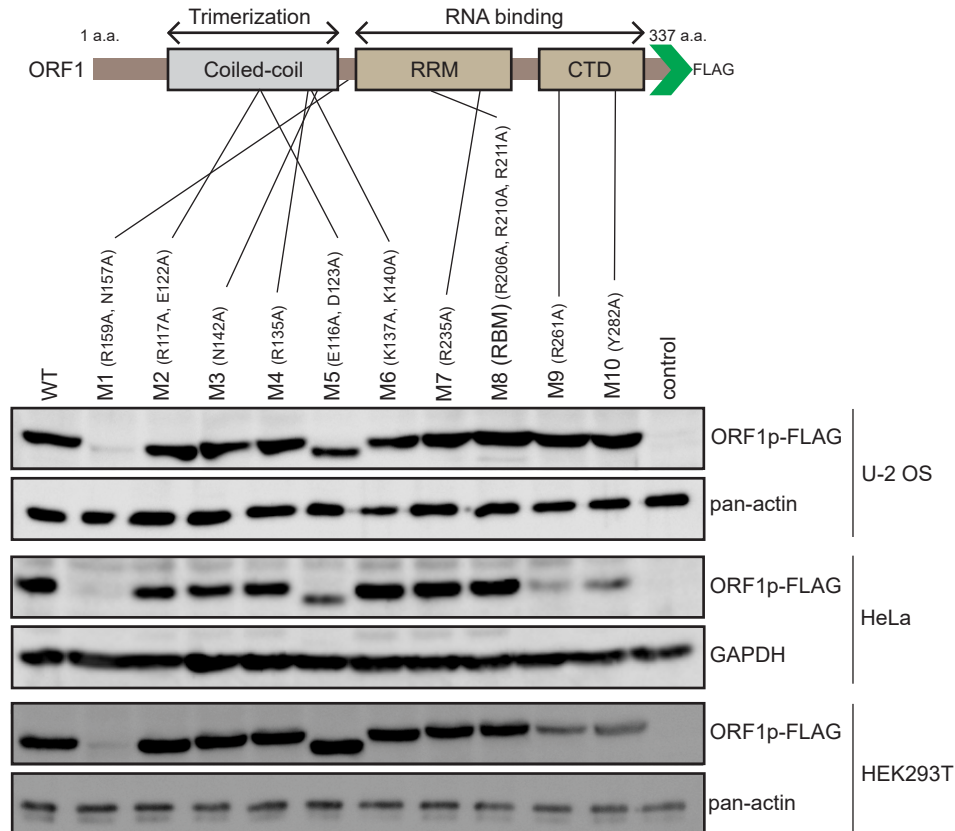

**c**

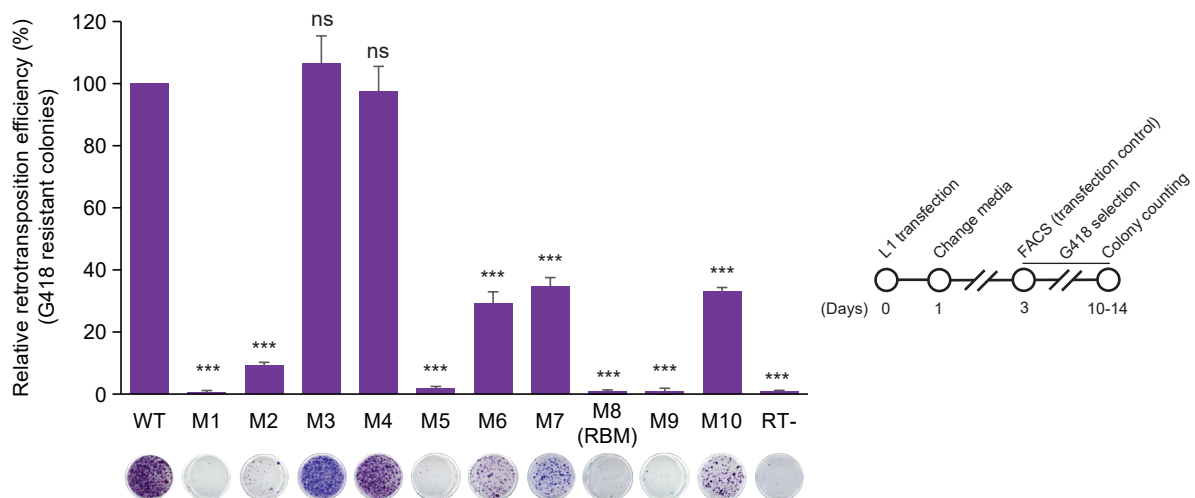

Supplementary Figure 2. Luqman-Fatah A. *et al.*

1761 **Supplementary Figure. 2 (supporting Figs. 1a, 1b, and 1d): L1 ORF1p mutational**  
1762 **analyses.**

1763 **(a)** *ORF1p mutants generated in this study.* Ten alanine missense ORF1p-FLAG mutants  
1764 (M1 to M10) were tested in various assays. Row 1, mutant number. Row 2, alanine mutations;  
1765 commas denote double (*i.e.*, M1, M2, M5, M6) or triple (*i.e.*, M8) mutants. Row 3, putative  
1766 functional domains affected by the alanine mutations. Row 4, references to previous studies  
1767 implicating the mutations in L1 biology. Some of the mutants were designed based upon the  
1768 ORF1p crystal structure. **(b)** *Schematic representation of ORF1p functional domains*  
1769 *containing the mutations noted in panel (a).* Top, relative positions of the respective mutated  
1770 amino acids. Bottom, western blots to test whether the relative mutations are expressed in U-  
1771 2 OS, HeLa-JVM, or HEK293T cells. The cells were transfected with: pJM101/L1.3FLAG (WT);  
1772 pALAF001 (M1); pALAF002 (M2); pALAF003 (M3); pALAF004 (M4); pALAF005 (M5);  
1773 pALAF006 (M6); pALAF007 (M7); pALAF008 (M8); pALAF009 (M9); or pALAF010 (M10). U-  
1774 2 OS, HeLa-JVM, or HEK293T cells were collected on day 5, day 9, or day 4 post-transfection,  
1775 respectively. An anti-FLAG antibody was used to detect ORF1p-FLAG. Pan-actin and GAPDH  
1776 served as loading controls. **(c)** *L1 retrotransposition efficiencies.* HeLa-JVM cells were co-  
1777 transfected with the plasmids used in panel (b) and a phrGFP-C plasmid to normalize for  
1778 transfection efficiencies and subjected to *mneol*-based retrotransposition assays (inset,  
1779 timeline of the assay). X-axis, mutant name and representative results from the assay; a  
1780 missense mutation in the ORF2p RT domain (RT-) served as a negative control. Y-axis, the  
1781 percentage of normalized G418-resistant foci compared to the WT (pJM101/L1.3FLAG)  
1782 control. Pairwise comparisons relative to the WT control:  $p = 1.8 \times 10^{-12***}$  (M1);  $7.6 \times 10^{-12***}$   
1783 (M2);  $0.56^{ns}$  (M3);  $0.67^{ns}$  (M4);  $2.1 \times 10^{-12***}$  (M5);  $5.7 \times 10^{-10***}$  (M6);  $1.4 \times 10^{-9***}$  (M7);  $2.1 \times$   
1784  $10^{-12***}$  (M8);  $2.0 \times 10^{-12***}$  (M9);  $1.3 \times 10^{-9***}$  (M10);  $2.0 \times 10^{-12***}$  (RT-). Values represent the  
1785 mean  $\pm$  SEM of three independent biological replicates. The  $p$ -values were calculated using a  
1786 one-way ANOVA followed by Bonferroni-Holm post-hoc tests: ns: not significant; \*\*\*  $p < 0.001$ .  
1787 The relative retrotransposition efficiencies and the representative results reported in Fig. 1d  
1788 were taken from this retrotransposition assay (WT and M8 [RBM]).



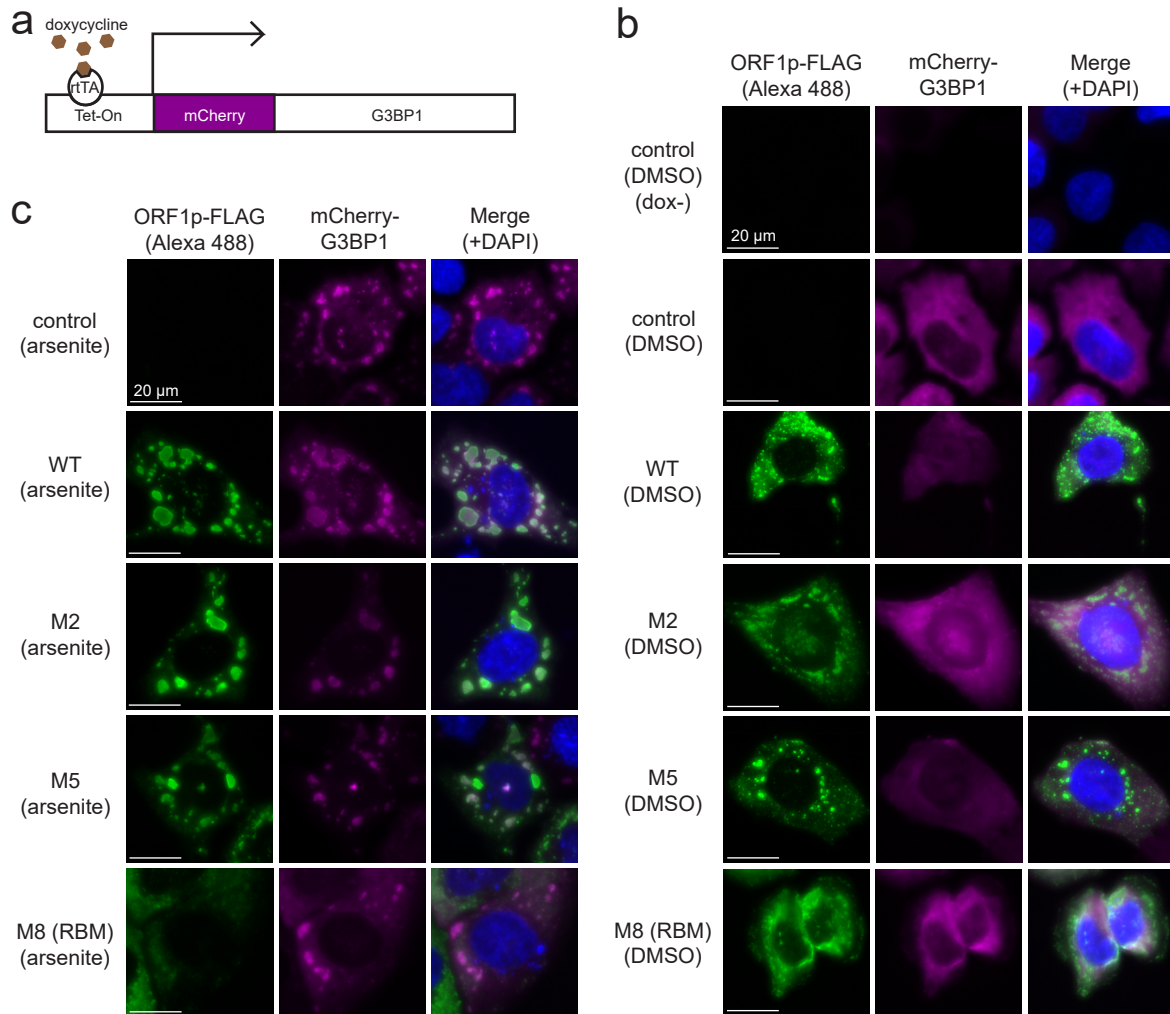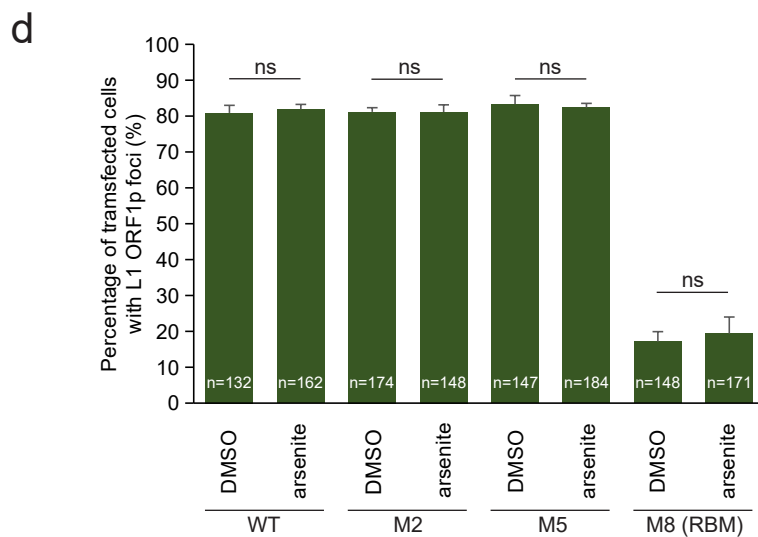

Supplementary Figure 3. Luqman-Fatah A. *et al.*

1789 **Supplementary Figure. 3 (supporting Figs. 1e and 1f): L1 cytoplasmic foci formation**  
1790 **with the ORF1p mutants.**

1791 **(a)** Schematic of the doxycycline inducible mCherry-G3BP1 expression plasmid. An mCherry-  
1792 G3BP1 fusion protein only will be expressed in U-2 OS cells when doxycycline binds to the  
1793 reverse tetracycline-controlled *trans*-activator protein (rtTA) and rtTA subsequently binds to  
1794 the Tet-On promoter to activate mCherry-G3BP1 transcription. **(b and c)** Representative  
1795 immunofluorescence images of WT, M2, M5, and M8 (RBM) ORF1p localization in the  
1796 absence (b) or presence (c) of arsenite. U-2 OS cells containing the inducible mCherry-G3BP1  
1797 expression cassette were transfected with pCEP4 (control), pJM101/L1.3FLAG (WT),  
1798 pALAF002 (M2), pALAF005 (M5), or pALAF008 (M8). Two days post-transfection, the cells  
1799 were treated with DMSO or 0.5 mM sodium arsenite for 1 hour prior to fixation. A mouse  
1800 primary anti-FLAG antibody and secondary anti-mouse-Alexa Fluor 488 fluorescent dye-  
1801 conjugated antibodies were used to visualize ORF1p. Cells not treated with doxycycline (dox-)  
1802 were included as a control in panel (b). White bars, 20  $\mu$ m. **(d)** Quantification of ORF1p-FLAG  
1803 cytoplasmic foci in U-2 OS cells transfected with WT, M2, M5, or M8 (RBM) ORF1p L1  
1804 expression constructs. X-axis, construct name and whether the cells were treated with vehicle  
1805 (DMSO) or arsenite. Y-axis, the percentage of transfected cells exhibiting ORF1p-FLAG  
1806 cytoplasmic foci. The numbers (n) within the green rectangles indicate the number of cells  
1807 analyzed in the experiment. The percentage of transfected cells with L1 ORF1p foci data in  
1808 Fig. 1f were taken from the WT (DMSO) and M8 (RBM) (DMSO) samples. Pairwise  
1809 comparisons between DMSO and arsenite-treated cells:  $p = 1.00^{\text{ns}}$  (WT);  $1.00^{\text{ns}}$  (M2);  $1.00^{\text{ns}}$   
1810 (M5);  $1.00^{\text{ns}}$  (M8 [RBM]). Values represent the mean  $\pm$  SEM of three independent biological  
1811 replicates. The  $p$ -values were calculated using a one-way ANOVA followed by Bonferroni-  
1812 Holm post-hoc tests. ns: not significant.

1813

1814

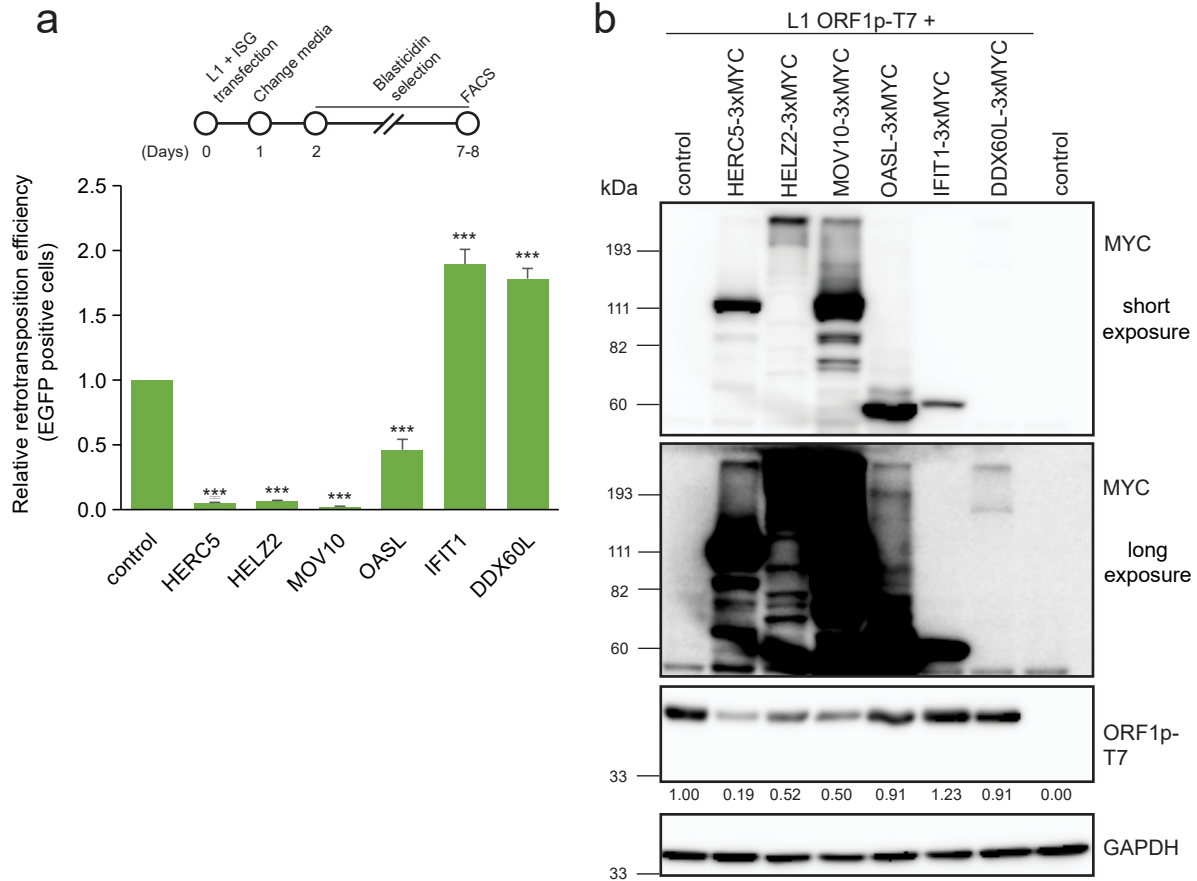

Supplementary Figure 4. Luqman-Fatah A. *et al.*

1815 **Supplementary Figure. 4 (supporting Figs. 4a and 4b): Functional analysis of the ISG**  
1816 **proteins in HEK293T cells.**

1817 **(a) Overexpression of HERC5, HELZ2, and OASL inhibit L1 retrotransposition in HEK293T.**

1818 Top: the timeline of the assay. HEK293T cells were co-transfected with cep99-gfp-L1.3 (which  
1819 has the *mEGFP1* retrotransposition indicator cassette) and either pCEP4 (control) or the  
1820 following individual ISG protein expression plasmids containing three copies of a MYC epitope  
1821 tag (3xMYC) at their respective carboxyl termini: pALAF015 (HELZ2); pALAF016 (IFIT1);  
1822 pALAF021 (DDX60L); pALAF022 (OASL); pALAF023 (HERC5); or pALAF024 (MOV10).  
1823 EGFP-positive cells transfected with cep99-gfp-L1.3 were counted using flow cytometry and  
1824 normalized to the number of EGFP-positive cells in the transfection control (*i.e.*, cells  
1825 independently transfected with the cep99-gfp-L1.3RT(-) intronless plasmid and each of the  
1826 above listed plasmids). X-axis, name of constructs co-transfected with cep99-gfp-L1.3. Y-axis,  
1827 relative percentage of EGFP-positive cells relative to the cep99-gfp-L1.3 + pCEP4 control.  
1828 Pairwise comparisons relative to the control:  $p = 4.8 \times 10^{-7***}$  (HERC5);  $4.6 \times 10^{-7***}$  (HELZ2);  
1829  $6.1 \times 10^{-7***}$  (MOV10);  $3.9 \times 10^{-5***}$  (OASL);  $6.2 \times 10^{-7***}$  (IFIT1);  $1.5 \times 10^{-6***}$  (DDX60L).  
1830 Values represent the mean  $\pm$  SEM from three independent biological replicates. The  $p$ -values  
1831 were calculated using a one-way ANOVA followed by Bonferroni-Holm post-hoc tests (\*\*  
1832  $p < 0.001$ ). **(b) Western blot detection of ORF1p in HEK293T cells co-transfected with ISG-**  
1833 **expressing plasmids.** HEK293T cells were co-transfected with pTMF3 (L1 containing T7  
1834 epitope-tagged ORF1p) and either pCMV-3Tag-8-Barr (control) or the individual ISG-  
1835 expressing plasmids used in panel (a). The relative band intensities of ORF1p-T7 are indicated  
1836 under the ORF1p-T7 blot. They were calculated using ImageJ software and are normalized to  
1837 the respective GAPDH band intensities. An anti-MYC antibody was used to detect the ISG  
1838 proteins, and the western blot was shown as the short (top) and long exposure (bottom)  
1839 images. An anti-T7 antibody was used to detect WT ORF1p-T7. GAPDH served as a loading  
1840 control. Molecular weight markers (kDa) are indicated at the left of the blots.

1841

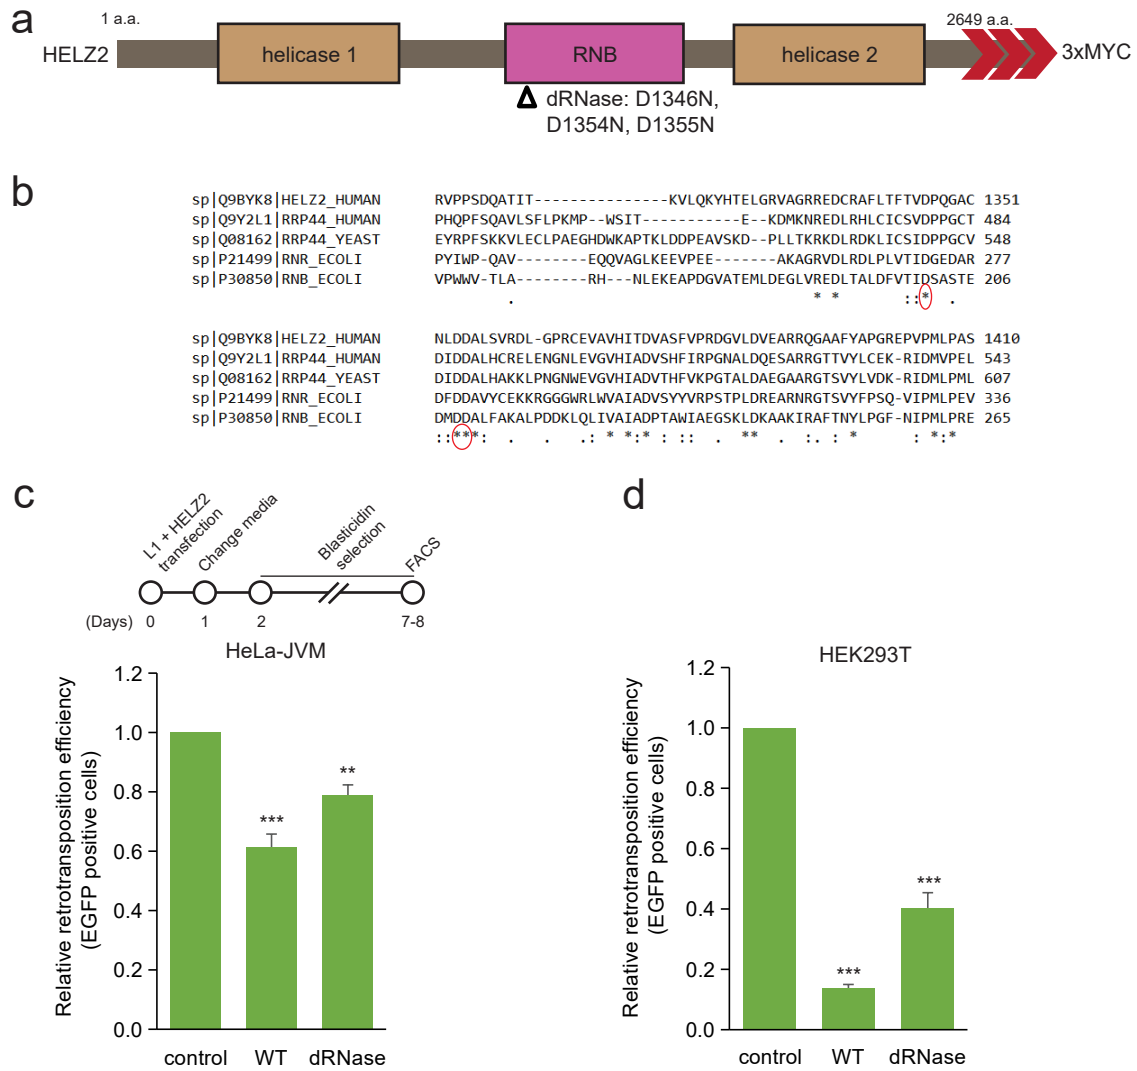

Supplementary Figure 5. Luqman-Fatah A. *et al.*

1842 **Supplementary Figure. 5 (supporting Figs. 5b, 5c, 5d, and 5e): Functional analyses of**  
1843 **the HELZ2 RNB domain.**

1844 **(a) Schematic of mutations in the HELZ2 RNB domain.** The HELZ2 protein contains two  
1845 putative helicase domains (helicase 1 and helicase 2), which surround a putative RNB  
1846 exonuclease domain. Open triangle, position of the missense mutations in conserved amino  
1847 acids within the RNB domain: D1346N/D1354N/D1355N (dRNase). Three red arrowheads,  
1848 relative positions of the 3xMYC carboxyl-terminal epitope tags. **(b) Identification of conserved**  
1849 **amino acids in the RNB domain.** Multiple sequence alignments of the following RNB-  
1850 containing proteins: *Homo sapiens* exosome complex exonuclease Rrp44 (RRP44\_HUMAN)  
1851 and HELZ2 (HELZ2\_HUMAN); *Saccharomyces cerevisiae* exosome complex exonuclease  
1852 Rrp44 (RRP44\_YEAST); and *Escherichia coli* RNase R (RNR\_ECOLI) and Exoribonuclease  
1853 2 (RNB\_ECOLI). Red circles, amino acids mutated in the D1346N/D1354N/D1355N (dRNase)  
1854 triple mutant. **(c) L1 retrotransposition efficiency in the presence of the**  
1855 **D1346N/D1354N/D1355N (dRNase) mutant in HeLa-JVM cells.** Top: the timeline for the  
1856 retrotransposition assays shown in panels (c) and (d). HeLa-JVM cells were co-transfected  
1857 with cepB-gfp-L1.3 (*mEGFP1*) and either pCMV-3Tag-8-Barr (control), pALAF015 (WT), or  
1858 pALAF030 (dRNase). The retrotransposition efficiency was normalized to the transfection  
1859 efficiency control (*i.e.*, cells co-transfected with cepB-gfp-L1.3RT(-) intronless and either  
1860 pCMV-3Tag-8-Barr (control), pALAF015 (WT), or pALAF030 (dRNase)). X-axis, name of the  
1861 plasmid co-transfected with cepB-gfp-L1.3 (*mEGFP1*). Y-axis, relative retrotransposition  
1862 efficiency relative to the cepB-gfp-L1.3 (*mEGFP1*) + pCMV-3Tag-8-Barr control. Pairwise  
1863 comparisons relative to the control:  $p = 9.5 \times 10^{-5***}$  (WT); 0.0073\*\* (dRNase). **(d) L1**  
1864 **retrotransposition efficiency in the presence of the D1346N/D1354N/D1355N (dRNase)**  
1865 **mutant in HEK293T cells.** Experiments were conducted as summarized in panel (c). Pairwise  
1866 comparisons relative to the cepB-gfp-L1.3 (*mEGFP1*) + pCMV-3Tag-8-Barr control:  $p = 9.4 \times$   
1867  $10^{-10***}$  (WT HELZ2),  $4.1 \times 10^{-8***}$  (dRNase). Values represent the mean  $\pm$  SEM of three  
1868 independent biological replicates. The  $p$ -values were calculated using a one-way ANOVA  
1869 followed by Bonferroni-Holm post-hoc tests. ns: not significant; \*\*\*  $p < 0.001$ .

1870

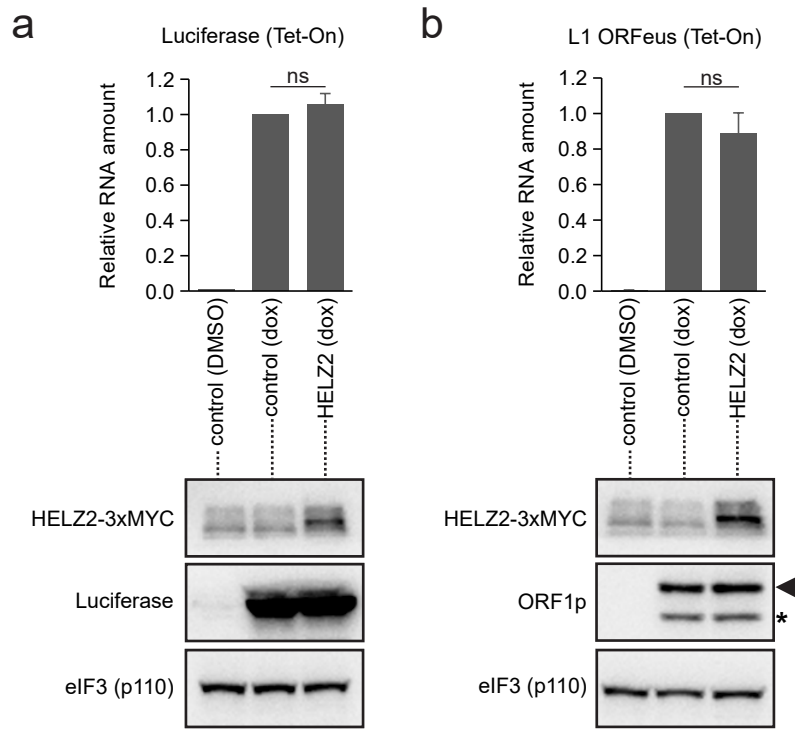

Supplementary Figure 6. Luqman-Fatah A. *et al.*

1871 **Supplementary Figure. 6 (supporting Figs. 6b, 6d, 6e, and 6f): The L1 5'UTR is required**  
1872 **for the HELZ2-mediated reduction in L1 RNA steady state levels.**

1873 **(a & b)** *The effect of HELZ2 on doxycycline inducible (Tet-On) luciferase (panel [a]) or human*  
1874 *L1 ORFeus (panel [b]) expression.* HeLa-JVM cells expressing inducible firefly luciferase  
1875 (pSBtet-RN) or human L1 ORFeus (pDA093) were treated with vehicle (DMSO) or doxycycline  
1876 (dox) and then transfected with either pCMV-3Tag-8-Barr (control) or pALAF015 (HELZ2).  
1877 Cells were collected 48 hours post-transfection. Top: Luciferase and L1 levels were quantified  
1878 using RT-qPCR (primer set: Luciferase and L1 [SV40], respectively) and normalized to  
1879 *GAPDH* RNA levels (primer set: *GAPDH*). X-axis, construct name and whether cells were  
1880 treated with vehicle (DMSO) or doxycycline (dox). Y-axis, RNA levels normalized to the  
1881 inducible firefly luciferase (pSBtet-RN) or human L1 ORFeus (pDA093) + pCMV-3Tag-8-Barr  
1882 control. Bottom: western blot analyses. An anti-MYC antibody was used to detect HELZ2, an  
1883 anti-luciferase antibody was used to detect luciferase, and an anti-ORF1p antibody was used  
1884 to detect ORF1p. Black arrowhead (middle right blot), the expected ORF1p band; asterisk  
1885 (middle right blot), unexpected lower molecular weight ORF1p band. The eIF3 subunit (p110)  
1886 served as a loading control. Values in the graphs represent the mean  $\pm$  SEM of three  
1887 independent biological replicates. The *p*-values were calculated using a one-way ANOVA  
1888 followed by Bonferroni-Holm post-hoc tests:  $p = 0.32^{\text{ns}}$  (Luciferase); and  $0.28^{\text{ns}}$  (L1); ns: not  
1889 significant.
